# Supplementary material for: Regulation of Early Host Immune Responses Shapes the Pathogenicity of Avian Influenza A Virus
Source: Front Microbiol. 2019 Sep 11;10:2007. doi: 10.3389/fmicb.2019.02007 (PMC6749051; doi:10.3389/fmicb.2019.02007)
Supplement: Supplementary file 2 [file Table_1.xlsx]

## Sheet: Table S1
Table S1. Microarry datasets used in this study
Group	GSE	Host	Stimulus	MOI	Platform	Hours post stimulatin
Interferon	GSE70217	Calu-3	IFNa	500U*	Agilent-026652 Whole Human Genome Microarray 4x44K v2 (Probe Name version)	6, 12, 18
Discovery	GSE80697	Calu-3	H1N1 (A/California/04/2009)	3	Agilent-026652 Whole Human Genome Microarray 4x44K v2 (Probe Name version)	0, 7, 12, 24, 36, 48
	GSE76599		H5N1 (A/Vietnam/1203/2004)	1	Agilent-026652 Whole Human Genome Microarray 4x44K v2 (Probe Name version)	0, 7, 12, 24
	GSE69026		H7N9(A/Anhui/1/2013)	1	Agilent-026652 Whole Human Genome Microarray 4x44K v2 (Probe Name version)	0, 7, 12, 24
Validation	GSE37571		H1N1(A/California/04/2009)	3	Agilent-014850 Whole Human Genome Microarray 4x44K G4112F (Probe Name version)	0, 3, 7, 12, 18, 24, 30, 36, 48
	GSE28166		H5N1(A/Vietnam/1203/2004)	1	Agilent-014850 Whole Human Genome Microarray 4x44K G4112F (Probe Name version)	0, 3, 7, 12, 18, 24
	GSE69026		H7N9(A/Anhui/1/2013 ferret adapted virus)	1	Agilent-026652 Whole Human Genome Microarray 4x44K v2 (Probe Name version)	0, 7, 12, 24
Mutation	GSE76599	Calu-3	H5N1(PB2-K627E)	1	Agilent-026652 Whole Human Genome Microarray 4x44K v2 (Probe Name version)	0, 7, 12, 24
	GSE76599		H5N1(NS1-trunc124)	1	Agilent-026652 Whole Human Genome Microarray 4x44K v2 (Probe Name version)	0, 7, 12, 24
	GSE69026		H7N9(NS1-103F/106M)	1	Agilent-026652 Whole Human Genome Microarray 4x44K v2 (Probe Name version)	0, 7, 12, 24

## Sheet: Table S2
Table S2. Transcription factor enrichment analysis
Motif Name	Website Link	IFNa_6h_up	IFNa_6h_down	IFNa_12h_up	IFNa_12h_down	IFNa_18h_up	IFNa_18h_down
STTTCRNTTT_IRF_Q6	http://www.broadinstitute.org/gsea/msigdb/cards/STTTCRNTTT_IRF_Q6	3.92189e-06	1	5.15744e-07	1	1	1
ICSBP_Q6	http://www.broadinstitute.org/gsea/msigdb/cards/ICSBP_Q6	5.58118e-05	1	0.000359934	1	1	1
ISRE_01	http://www.broadinstitute.org/gsea/msigdb/cards/ISRE_01	0.000217852	1	9.51967e-05	1	1	1
IRF_Q6	http://www.broadinstitute.org/gsea/msigdb/cards/IRF_Q6	0.0109272	1	3.78993e-07	1	1	1
IRF7_01	http://www.broadinstitute.org/gsea/msigdb/cards/IRF7_01	0.058664	1	0.000413776	1	1	1
GGGCGGR_SP1_Q6	http://www.broadinstitute.org/gsea/msigdb/cards/GGGCGGR_SP1_Q6	1	2.80969e-18	1	1	1	1
SCGGAAGY_ELK1_02	http://www.broadinstitute.org/gsea/msigdb/cards/SCGGAAGY_ELK1_02	1	4.07255e-10	1	1	1	1
CTTTGT_LEF1_Q2	http://www.broadinstitute.org/gsea/msigdb/cards/CTTTGT_LEF1_Q2	1	3.95677e-07	1	1	1	1
GTGACGY_E4F1_Q6	http://www.broadinstitute.org/gsea/msigdb/cards/GTGACGY_E4F1_Q6	1	6.99042e-07	1	1	1	1
MGGAAGTG_GABP_B	http://www.broadinstitute.org/gsea/msigdb/cards/MGGAAGTG_GABP_B	1	7.82633e-06	1	1	1	1
CETS1P54_01	http://www.broadinstitute.org/gsea/msigdb/cards/CETS1P54_01	1	7.84368e-06	1	1	1	1
RYTTCCTG_ETS2_B	http://www.broadinstitute.org/gsea/msigdb/cards/RYTTCCTG_ETS2_B	1	1.82755e-05	1	1	1	1
GGGYGTGNY_UNKNOWN	http://www.broadinstitute.org/gsea/msigdb/cards/GGGYGTGNY_UNKNOWN	1	8.06285e-05	1	1	1	1
GCCATNTTG_YY1_Q6	http://www.broadinstitute.org/gsea/msigdb/cards/GCCATNTTG_YY1_Q6	1	0.00015738	1	1	1	1
GGGAGGRR_MAZ_Q6	http://www.broadinstitute.org/gsea/msigdb/cards/GGGAGGRR_MAZ_Q6	1	0.000380208	1	1	1	1
GABP_B	http://www.broadinstitute.org/gsea/msigdb/cards/GABP_B	1	0.000790841	1	1	1	1
YY1_Q6	http://www.broadinstitute.org/gsea/msigdb/cards/YY1_Q6	1	0.00093436	1	1	1	1
AACTTT_UNKNOWN	http://www.broadinstitute.org/gsea/msigdb/cards/AACTTT_UNKNOWN	1	0.000935301	1	1	1	1
RCGCANGCGY_NRF1_Q6	http://www.broadinstitute.org/gsea/msigdb/cards/RCGCANGCGY_NRF1_Q6	1	0.00101977	1	1	1	1
YY1_02	http://www.broadinstitute.org/gsea/msigdb/cards/YY1_02	1	0.00207321	1	1	1	1
ELK1_02	http://www.broadinstitute.org/gsea/msigdb/cards/ELK1_02	1	0.00332556	1	1	1	1
STAT1_02	http://www.broadinstitute.org/gsea/msigdb/cards/STAT1_02	1	0.00355232	1	1	1	1
MYCMAX_B	http://www.broadinstitute.org/gsea/msigdb/cards/MYCMAX_B	1	0.0035761	1	1	1	1
BACH2_01	http://www.broadinstitute.org/gsea/msigdb/cards/BACH2_01	1	0.00459703	1	1	1	1
STAT1_03	http://www.broadinstitute.org/gsea/msigdb/cards/STAT1_03	1	0.00870225	1	1	1	1
CTTTAAR_UNKNOWN	http://www.broadinstitute.org/gsea/msigdb/cards/CTTTAAR_UNKNOWN	1	0.00876538	1	1	1	1
NRF2_01	http://www.broadinstitute.org/gsea/msigdb/cards/NRF2_01	1	0.0123227	1	1	1	1
E2F1_Q4	http://www.broadinstitute.org/gsea/msigdb/cards/E2F1_Q4	1	0.0153738	1	1	1	1
SMTTTTGT_UNKNOWN	http://www.broadinstitute.org/gsea/msigdb/cards/SMTTTTGT_UNKNOWN	1	0.0214872	1	1	1	1
SRF_01	http://www.broadinstitute.org/gsea/msigdb/cards/SRF_01	1	0.0271565	1	1	1	1
CREB_02	http://www.broadinstitute.org/gsea/msigdb/cards/CREB_02	1	0.0297035	1	1	1	1
ELK1_01	http://www.broadinstitute.org/gsea/msigdb/cards/ELK1_01	1	0.0319317	1	1	1	1
CAGGTG_E12_Q6	http://www.broadinstitute.org/gsea/msigdb/cards/CAGGTG_E12_Q6	1	0.0352593	1	1	1	1
SRF_C	http://www.broadinstitute.org/gsea/msigdb/cards/SRF_C	1	0.0484363	1	1	1	1
SP3_Q3	http://www.broadinstitute.org/gsea/msigdb/cards/SP3_Q3	1	0.0488106	0.156802	1	1	1
KCCGNSWTTT_UNKNOWN	http://www.broadinstitute.org/gsea/msigdb/cards/KCCGNSWTTT_UNKNOWN	1	0.0502802	1	1	1	1
YY1_01	http://www.broadinstitute.org/gsea/msigdb/cards/YY1_01	1	0.0516698	1	1	1	1
TGCGCANK_UNKNOWN	http://www.broadinstitute.org/gsea/msigdb/cards/TGCGCANK_UNKNOWN	1	0.0583546	1	1	1	1

## Sheet: Table S3
Table S3. Clusters of ISDEGs
Gene symbols	Clusters
CMPK2	cluster_8_1
DDX58	cluster_8_1
HELZ2	cluster_8_1
IFI27	cluster_8_1
IFI44	cluster_8_1
IFI44L	cluster_8_1
IFIT1	cluster_8_1
IFIT2	cluster_8_1
IFIT3	cluster_8_1
IFITM1	cluster_8_1
IRF7	cluster_8_1
MX1	cluster_8_1
MX2	cluster_8_1
OAS1	cluster_8_1
OASL	cluster_8_1
PARP4	cluster_8_1
RSAD2	cluster_8_1
SAMD9L	cluster_8_1
TRIM22	cluster_8_1
USP18	cluster_8_1
XAF1	cluster_8_1
BST2	cluster_7_2
DDX60L	cluster_7_2
EPSTI1	cluster_7_2
HERC5	cluster_7_2
IFI16	cluster_7_2
IFI6	cluster_7_2
IRF9	cluster_7_2
ISG15	cluster_7_2
SLC15A3	cluster_7_2
SP110	cluster_7_2
USP41	cluster_7_2
ARVCF	cluster_7_1
BATF2	cluster_7_1
BCL10	cluster_7_1
CEBPZOS	cluster_7_1
CRIM1	cluster_7_1
DHX58	cluster_7_1
GOLGA6C	cluster_7_1
GPR37	cluster_7_1
HIST1H3J	cluster_7_1
ICMT	cluster_7_1
IFIH1	cluster_7_1
IFIT5	cluster_7_1
LAMP3	cluster_7_1
LOC100128593	cluster_7_1
LOC100130171	cluster_7_1
LOC100131581	cluster_7_1
LRRD1	cluster_7_1
NACAP1	cluster_7_1
NR4A1	cluster_7_1
PARP10	cluster_7_1
PCMTD1	cluster_7_1
PIAS4	cluster_7_1
POFUT1	cluster_7_1
RASGRP3	cluster_7_1
REC8	cluster_7_1
RNASE13	cluster_7_1
RTP4	cluster_7_1
SNRPD2P2	cluster_7_1
STAT2	cluster_7_1
TGM6	cluster_7_1
TPT1P8	cluster_7_1
TRANK1	cluster_7_1
TRIM14	cluster_7_1
VCY	cluster_7_1
ZNF680	cluster_7_1
APOL4	cluster_6_3
BMP8B	cluster_6_3
BPNT1	cluster_6_3
CCL24	cluster_6_3
CCM2	cluster_6_3
CEACAM20	cluster_6_3
CT47A11	cluster_6_3
DNAJA1P5	cluster_6_3
DSTNP2	cluster_6_3
DTNA	cluster_6_3
DTX3L	cluster_6_3
ETV7	cluster_6_3
GBP4	cluster_6_3
GJB4	cluster_6_3
HCN2	cluster_6_3
HCRTR1	cluster_6_3
HERC3	cluster_6_3
HIST1H3D	cluster_6_3
HIST1H3F	cluster_6_3
HIST1H3H	cluster_6_3
HIST1H3I	cluster_6_3
HSH2D	cluster_6_3
HSP90AB6P	cluster_6_3
IDO1	cluster_6_3
IFITM2	cluster_6_3
IFITM3	cluster_6_3
JADE2	cluster_6_3
KCNT1	cluster_6_3
KIAA1524	cluster_6_3
KIRREL2	cluster_6_3
KRTAP10-10	cluster_6_3
KRTAP19-2	cluster_6_3
KRTAP5-2	cluster_6_3
LAP3	cluster_6_3
LGALS9C	cluster_6_3
LINC00924	cluster_6_3
LINC01101	cluster_6_3
LMX1B	cluster_6_3
LOC100130560	cluster_6_3
LOC100130654	cluster_6_3
LOC100506955	cluster_6_3
LOC146795	cluster_6_3
LOC1720	cluster_6_3
LOC646214	cluster_6_3
LOC729080	cluster_6_3
MED29	cluster_6_3
MT3	cluster_6_3
NFE2L2	cluster_6_3
NMI	cluster_6_3
OSTCP1	cluster_6_3
OTOF	cluster_6_3
PABPC3	cluster_6_3
PARP14	cluster_6_3
PHF11	cluster_6_3
PNPT1	cluster_6_3
PPIAL4G	cluster_6_3
QKI	cluster_6_3
RAB33B	cluster_6_3
RABL2B	cluster_6_3
RBM20	cluster_6_3
RHBDL1	cluster_6_3
SLC25A51	cluster_6_3
SMURF1	cluster_6_3
TAP1	cluster_6_3
TBC1D3B	cluster_6_3
TCEAL2	cluster_6_3
TLN2	cluster_6_3
TMEM27	cluster_6_3
TNFSF10	cluster_6_3
WDR17	cluster_6_3
ZNF808	cluster_6_3
ACTG1P4	cluster_6_2
APOL6	cluster_6_2
CAV3	cluster_6_2
DDX60	cluster_6_2
HERC6	cluster_6_2
IFITM4P	cluster_6_2
OAS2	cluster_6_2
OAS3	cluster_6_2
PARP12	cluster_6_2
PARP9	cluster_6_2
SAMD9	cluster_6_2
SAMHD1	cluster_6_2
SGSM2	cluster_6_2
STAT1	cluster_6_2
ABHD13	cluster_6_1
ACE2	cluster_6_1
ACKR1	cluster_6_1
ADPRH	cluster_6_1
AGAP7P	cluster_6_1
ALG10	cluster_6_1
AMPD3	cluster_6_1
ANK2	cluster_6_1
ANKFY1	cluster_6_1
ANKRD37	cluster_6_1
ANO8	cluster_6_1
AP5S1	cluster_6_1
APOL2	cluster_6_1
ARSJ	cluster_6_1
ASB10	cluster_6_1
ASTN2	cluster_6_1
ATP10A	cluster_6_1
B3GALT5-AS1	cluster_6_1
BCL7B	cluster_6_1
BMS1P6	cluster_6_1
BTN2A1	cluster_6_1
C17orf67	cluster_6_1
C18orf12	cluster_6_1
C20orf144	cluster_6_1
C5orf58	cluster_6_1
C6orf25	cluster_6_1
C8orf31	cluster_6_1
CABP7	cluster_6_1
CACNA1C	cluster_6_1
CAPN10	cluster_6_1
CARD16	cluster_6_1
CCDC68	cluster_6_1
CD79A	cluster_6_1
CHKB-AS1	cluster_6_1
CIITA	cluster_6_1
CLK3	cluster_6_1
CLN8	cluster_6_1
CMTM1	cluster_6_1
COX20	cluster_6_1
CRACR2B	cluster_6_1
CXCL8	cluster_6_1
CXorf38	cluster_6_1
CYP1A2	cluster_6_1
CYP2J2	cluster_6_1
DAGLA	cluster_6_1
DCHS2	cluster_6_1
DEFB132	cluster_6_1
DIS3L2	cluster_6_1
DNAJC18	cluster_6_1
DZIP1L	cluster_6_1
ERN2	cluster_6_1
F2RL3	cluster_6_1
FAM122C	cluster_6_1
FAM181A	cluster_6_1
FAM210A	cluster_6_1
FAM214B	cluster_6_1
FAM46A	cluster_6_1
FAM83H-AS1	cluster_6_1
FAM84A	cluster_6_1
FAP	cluster_6_1
FAT3	cluster_6_1
FBLL1	cluster_6_1
FBXL16	cluster_6_1
FCER1G	cluster_6_1
FGF2	cluster_6_1
FLYWCH2	cluster_6_1
FRS3	cluster_6_1
FSTL4	cluster_6_1
FZR1	cluster_6_1
GAS2L1P2	cluster_6_1
GEMIN2	cluster_6_1
GEMIN8P4	cluster_6_1
GGN	cluster_6_1
GGT1	cluster_6_1
GRIA4	cluster_6_1
GRID2IP	cluster_6_1
GRIN3B	cluster_6_1
GSDMC	cluster_6_1
HEXDC	cluster_6_1
HIF3A	cluster_6_1
HINT3	cluster_6_1
HMX1	cluster_6_1
HPCA	cluster_6_1
HRASLS2	cluster_6_1
IL1RN	cluster_6_1
IL22RA1	cluster_6_1
IL4I1	cluster_6_1
ISG20	cluster_6_1
JMJD1C-AS1	cluster_6_1
KIAA1217	cluster_6_1
KPNA1	cluster_6_1
KRTAP19-8	cluster_6_1
KRTAP3-3	cluster_6_1
KRTAP9-1	cluster_6_1
LINC00858	cluster_6_1
LINC00923	cluster_6_1
LINC00930	cluster_6_1
LINC00941	cluster_6_1
LINC01144	cluster_6_1
LINC01220	cluster_6_1
LINC01432	cluster_6_1
LINGO4	cluster_6_1
LMO2	cluster_6_1
LOC100128714	cluster_6_1
LOC100129596	cluster_6_1
LOC100130916	cluster_6_1
LOC100507431	cluster_6_1
LOC113230	cluster_6_1
LOC145474	cluster_6_1
LOC284014	cluster_6_1
LOC284080	cluster_6_1
LOC284379	cluster_6_1
LOC285095	cluster_6_1
LOC389641	cluster_6_1
LOC647086	cluster_6_1
LOC730020	cluster_6_1
LOC730338	cluster_6_1
LONP2	cluster_6_1
LRRC57	cluster_6_1
METTL25	cluster_6_1
MGC34796	cluster_6_1
MMP17	cluster_6_1
MMP28	cluster_6_1
MOP-1	cluster_6_1
MRPL42P5	cluster_6_1
MRPL57	cluster_6_1
MT1M	cluster_6_1
MT2A	cluster_6_1
MTERF1	cluster_6_1
MTMR9LP	cluster_6_1
NCOA7	cluster_6_1
NCS1	cluster_6_1
NDUFAF4P1	cluster_6_1
NECAB1	cluster_6_1
NEURL1	cluster_6_1
NEUROG3	cluster_6_1
NKAPL	cluster_6_1
NLRC5	cluster_6_1
NNAT	cluster_6_1
NOL6	cluster_6_1
NPHP4	cluster_6_1
NTRK3	cluster_6_1
NUDT16P1	cluster_6_1
ODF3B	cluster_6_1
OR10G2	cluster_6_1
OR5L2	cluster_6_1
OXTR	cluster_6_1
PATL2	cluster_6_1
PAX4	cluster_6_1
PAX9	cluster_6_1
PCBD2	cluster_6_1
PDGFRL	cluster_6_1
PEBP4	cluster_6_1
PF4	cluster_6_1
PHACTR2	cluster_6_1
PI15	cluster_6_1
PLCH2	cluster_6_1
PLEKHA4	cluster_6_1
PML	cluster_6_1
PPFIBP1	cluster_6_1
PPP1R14A	cluster_6_1
PRB1	cluster_6_1
PRSS36	cluster_6_1
RAB12	cluster_6_1
RANBP3	cluster_6_1
RBFOX2	cluster_6_1
RBM11	cluster_6_1
REREP3	cluster_6_1
RINT1	cluster_6_1
RMND5A	cluster_6_1
RNF113B	cluster_6_1
RNF224	cluster_6_1
RORB	cluster_6_1
RPL23AP64	cluster_6_1
RPL23AP87	cluster_6_1
S1PR3	cluster_6_1
SAA2	cluster_6_1
SDHAF4	cluster_6_1
SECTM1	cluster_6_1
SEL1L	cluster_6_1
SEPT7P2	cluster_6_1
SFTPA2	cluster_6_1
SIGLEC16	cluster_6_1
SIRPB1	cluster_6_1
SKA3	cluster_6_1
SLC25A22	cluster_6_1
SLC25A53	cluster_6_1
SLC30A6	cluster_6_1
SLC34A3	cluster_6_1
SMCR8	cluster_6_1
SMIM5	cluster_6_1
SMPD3	cluster_6_1
SNCB	cluster_6_1
SNHG10	cluster_6_1
SP140	cluster_6_1
SPIRE2	cluster_6_1
SPSB1	cluster_6_1
SPTBN2	cluster_6_1
SRP9	cluster_6_1
STX17-AS1	cluster_6_1
SULT1A2	cluster_6_1
SUSD3	cluster_6_1
SUSD4	cluster_6_1
TATDN3	cluster_6_1
TBC1D32	cluster_6_1
TBXA2R	cluster_6_1
TDRD7	cluster_6_1
THAP5	cluster_6_1
TLR3	cluster_6_1
TLX3	cluster_6_1
TMEM120B	cluster_6_1
TMEM121	cluster_6_1
TNFRSF25	cluster_6_1
TONSL	cluster_6_1
TPMT	cluster_6_1
TRAF7	cluster_6_1
TREX1	cluster_6_1
TRIM23	cluster_6_1
TRIM25	cluster_6_1
TSPAN12	cluster_6_1
TUBA8	cluster_6_1
TUBBP5	cluster_6_1
UBD	cluster_6_1
UBQLNL	cluster_6_1
UCP3	cluster_6_1
USP49	cluster_6_1
WASH3P	cluster_6_1
XDH	cluster_6_1
XRCC6P5	cluster_6_1
ZBTB3	cluster_6_1
ZBTB49	cluster_6_1
ZC3HAV1	cluster_6_1
ZCCHC2	cluster_6_1
ZCCHC4	cluster_6_1
ZHX1-C8orf76	cluster_6_1
ZIC4	cluster_6_1
ZNF319	cluster_6_1
ZNF367	cluster_6_1
ZNF43	cluster_6_1
ZNF844	cluster_6_1
ZNF90	cluster_6_1
ACBD4	cluster_5_2
ACER2	cluster_5_2
ACSL3	cluster_5_2
ADAM7	cluster_5_2
ADAR	cluster_5_2
AGPAT3	cluster_5_2
AKR1C4	cluster_5_2
ALPPL2	cluster_5_2
AMZ1	cluster_5_2
ANKRD45	cluster_5_2
ANXA2P3	cluster_5_2
ARHGAP4	cluster_5_2
ARHGEF15	cluster_5_2
ATOH8	cluster_5_2
BORCS8	cluster_5_2
C11orf42	cluster_5_2
C17orf50	cluster_5_2
C17orf74	cluster_5_2
C19orf66	cluster_5_2
C1orf123	cluster_5_2
C2	cluster_5_2
C2orf50	cluster_5_2
C5orf56	cluster_5_2
C8orf58	cluster_5_2
C9orf153	cluster_5_2
CBX2	cluster_5_2
CCDC129	cluster_5_2
CCDC61	cluster_5_2
CCR1	cluster_5_2
CD300LB	cluster_5_2
CD8A	cluster_5_2
CDCP2	cluster_5_2
CERS3	cluster_5_2
CHIT1	cluster_5_2
CLHC1	cluster_5_2
COL10A1	cluster_5_2
CPLX2	cluster_5_2
CREB3L1	cluster_5_2
CST3	cluster_5_2
CTAGE1	cluster_5_2
CYP4F30P	cluster_5_2
DCT	cluster_5_2
DIRC1	cluster_5_2
DNAJC5G	cluster_5_2
DPT	cluster_5_2
DSCR10	cluster_5_2
EDA2R	cluster_5_2
EIF1AY	cluster_5_2
EIF2AK2	cluster_5_2
EPHX3	cluster_5_2
ERVFRD-2	cluster_5_2
ERVH-3	cluster_5_2
FAM178B	cluster_5_2
FGF1	cluster_5_2
FLJ36000	cluster_5_2
FLJ37786	cluster_5_2
FMO1	cluster_5_2
FOXI2	cluster_5_2
FOXP1	cluster_5_2
GATSL3	cluster_5_2
GBGT1	cluster_5_2
GBP1	cluster_5_2
GBP3	cluster_5_2
GCLM	cluster_5_2
GP1BB	cluster_5_2
GPSM1	cluster_5_2
GRIK5	cluster_5_2
GRIN2A	cluster_5_2
GYPA	cluster_5_2
HCRT	cluster_5_2
HIST1H4D	cluster_5_2
HMP19	cluster_5_2
HRASLS5	cluster_5_2
HRH2	cluster_5_2
IFI35	cluster_5_2
IL18RAP	cluster_5_2
ILDR1	cluster_5_2
ITGB2	cluster_5_2
KANK3	cluster_5_2
KCNK15	cluster_5_2
KIF19	cluster_5_2
KIF21B	cluster_5_2
KLF17	cluster_5_2
KRBA2	cluster_5_2
KRT31	cluster_5_2
KRT73	cluster_5_2
KRT81	cluster_5_2
KRTAP10-12	cluster_5_2
KRTAP10-8	cluster_5_2
KRTAP19-5	cluster_5_2
KRTAP5-4	cluster_5_2
KRTAP6-3	cluster_5_2
KSR2	cluster_5_2
LANCL3	cluster_5_2
LAT2	cluster_5_2
LBX2-AS1	cluster_5_2
LENG8	cluster_5_2
LGALS3BP	cluster_5_2
LGALS9	cluster_5_2
LGR6	cluster_5_2
LILRB4	cluster_5_2
LINC00626	cluster_5_2
LINC00982	cluster_5_2
LMAN1L	cluster_5_2
LOC100128185	cluster_5_2
LOC100128843	cluster_5_2
LOC100131864	cluster_5_2
LOC100134868	cluster_5_2
LOC115110	cluster_5_2
LOC153811	cluster_5_2
LOC283270	cluster_5_2
LOC285957	cluster_5_2
LOC389033	cluster_5_2
LOC393078	cluster_5_2
LOC400662	cluster_5_2
LOC401557	cluster_5_2
LOC441666	cluster_5_2
LOC643802	cluster_5_2
LOC647070	cluster_5_2
LRCH4	cluster_5_2
LRP1	cluster_5_2
LRRC27	cluster_5_2
LYSMD3	cluster_5_2
MAP4	cluster_5_2
MOCS3	cluster_5_2
MRGPRX4	cluster_5_2
MST152	cluster_5_2
NAT8L	cluster_5_2
NEGR1	cluster_5_2
NKX1-2	cluster_5_2
NPHS2	cluster_5_2
NT5C3A	cluster_5_2
NUTM2D	cluster_5_2
NYX	cluster_5_2
OR10H2	cluster_5_2
OR1F2P	cluster_5_2
OR1J4	cluster_5_2
OR1S1	cluster_5_2
OR6K2	cluster_5_2
OTUD6A	cluster_5_2
P2RX3	cluster_5_2
PBOV1	cluster_5_2
PCED1B-AS1	cluster_5_2
PITX3	cluster_5_2
PLSCR1	cluster_5_2
PSMB9	cluster_5_2
PTK2B	cluster_5_2
RAPGEF3	cluster_5_2
RASD1	cluster_5_2
RASD2	cluster_5_2
RBM43	cluster_5_2
RBMXL1	cluster_5_2
RNF180	cluster_5_2
RNF213	cluster_5_2
RTBDN	cluster_5_2
SCARNA9L	cluster_5_2
SEMA4A	cluster_5_2
SETP20	cluster_5_2
SIGLEC15	cluster_5_2
SLC12A5	cluster_5_2
SLC14A2	cluster_5_2
SLC19A3	cluster_5_2
SLC22A17	cluster_5_2
SLC22A23	cluster_5_2
SLC22A31	cluster_5_2
SLC25A3P1	cluster_5_2
SLC5A6	cluster_5_2
SNORD12B	cluster_5_2
STAG3L2	cluster_5_2
STARD9	cluster_5_2
SVEP1	cluster_5_2
TACR2	cluster_5_2
TBKBP1	cluster_5_2
TCEANC2	cluster_5_2
TCF15	cluster_5_2
TEX41	cluster_5_2
TGFA	cluster_5_2
TLE6	cluster_5_2
TMED7-TICAM2	cluster_5_2
TMEM140	cluster_5_2
TMEM201	cluster_5_2
TMEM262	cluster_5_2
TNFAIP8L1	cluster_5_2
TNRC6C	cluster_5_2
TP53TG3	cluster_5_2
TPBGL	cluster_5_2
TRAPPC3L	cluster_5_2
TRIM34	cluster_5_2
TRIM5	cluster_5_2
TRPC6	cluster_5_2
TSNARE1	cluster_5_2
TTC36	cluster_5_2
TUBA3FP	cluster_5_2
UBE2L6	cluster_5_2
USF2	cluster_5_2
WNK4	cluster_5_2
ZAN	cluster_5_2
ZFP3	cluster_5_2
ZNF157	cluster_5_2
ZNF430	cluster_5_2
ZNF479	cluster_5_2
ZNF492	cluster_5_2
ZNF676	cluster_5_2
ZNF732	cluster_5_2
ZNF736	cluster_5_2
ZNF737	cluster_5_2
ZNF763	cluster_5_2
ZNF85	cluster_5_2
ZNFX1	cluster_5_2
ABCD3	cluster_5_1
ACTL8	cluster_5_1
ACTR3BP2	cluster_5_1
ADAM33	cluster_5_1
ADGRD2	cluster_5_1
AGRP	cluster_5_1
AMPH	cluster_5_1
AQP7P3	cluster_5_1
ARMC9	cluster_5_1
ART4	cluster_5_1
ASIC2	cluster_5_1
ATP2B1	cluster_5_1
ATP6V1E2	cluster_5_1
BAIAP2-AS1	cluster_5_1
BLOC1S1	cluster_5_1
C9orf131	cluster_5_1
C9orf173	cluster_5_1
CAPN5	cluster_5_1
CAPN7	cluster_5_1
CASC10	cluster_5_1
CASC22	cluster_5_1
CASQ1	cluster_5_1
CATSPERG	cluster_5_1
CCDC107	cluster_5_1
CCDC96	cluster_5_1
CCT6B	cluster_5_1
CD177	cluster_5_1
CDC14C	cluster_5_1
CDH2	cluster_5_1
CDK20	cluster_5_1
CDX4	cluster_5_1
CLEC11A	cluster_5_1
CNIH2	cluster_5_1
CNTNAP3B	cluster_5_1
CPEB1	cluster_5_1
CRABP1	cluster_5_1
CRHR2	cluster_5_1
CSTF3-AS1	cluster_5_1
CT55	cluster_5_1
CYP3A43	cluster_5_1
DAAM2	cluster_5_1
DHDH	cluster_5_1
DIO2	cluster_5_1
DISP2	cluster_5_1
DLG5-AS1	cluster_5_1
DNAJC22	cluster_5_1
DRD4	cluster_5_1
DUSP26	cluster_5_1
ENPP1	cluster_5_1
ERICH2	cluster_5_1
FAM13A-AS1	cluster_5_1
FAM156B	cluster_5_1
FAM71E1	cluster_5_1
FBP1	cluster_5_1
FCN3	cluster_5_1
FECH	cluster_5_1
FLJ46906	cluster_5_1
FLYWCH1	cluster_5_1
FMN1	cluster_5_1
FOXI3	cluster_5_1
FREM2	cluster_5_1
FRMD1	cluster_5_1
GABPB2	cluster_5_1
GALNT18	cluster_5_1
GAPT	cluster_5_1
GBA3	cluster_5_1
GCFC2	cluster_5_1
GCG	cluster_5_1
GLYCTK	cluster_5_1
GNAZ	cluster_5_1
GPAT2	cluster_5_1
GPR119	cluster_5_1
GPR88	cluster_5_1
GPX7	cluster_5_1
GRK5	cluster_5_1
HAP1	cluster_5_1
HCST	cluster_5_1
HEPH	cluster_5_1
HERC2P7	cluster_5_1
HHAT	cluster_5_1
HIST1H1C	cluster_5_1
HNRNPA0	cluster_5_1
HOXC4	cluster_5_1
HRH3	cluster_5_1
ICOSLG	cluster_5_1
IFFO1	cluster_5_1
IFT22	cluster_5_1
IKBKAP	cluster_5_1
IL17A	cluster_5_1
IL23A	cluster_5_1
IL34	cluster_5_1
INHBC	cluster_5_1
IPO9	cluster_5_1
IQSEC3	cluster_5_1
ISLR	cluster_5_1
ISLR2	cluster_5_1
ITGAM	cluster_5_1
KBTBD11	cluster_5_1
KLF8	cluster_5_1
KLK2	cluster_5_1
KRT32	cluster_5_1
KRTAP10-2	cluster_5_1
KRTAP10-5	cluster_5_1
KRTAP10-9	cluster_5_1
KRTAP11-1	cluster_5_1
KTN1-AS1	cluster_5_1
LCE1E	cluster_5_1
LDHD	cluster_5_1
LILRA1	cluster_5_1
LINC00106	cluster_5_1
LINC01124	cluster_5_1
LINC01160	cluster_5_1
LOC100128644	cluster_5_1
LOC100130276	cluster_5_1
LOC100130540	cluster_5_1
LOC100130691	cluster_5_1
LOC100130745	cluster_5_1
LOC100131150	cluster_5_1
LOC100131432	cluster_5_1
LOC100132790	cluster_5_1
LOC100291323	cluster_5_1
LOC145783	cluster_5_1
LOC221946	cluster_5_1
LOC389247	cluster_5_1
LOC400464	cluster_5_1
LOC440461	cluster_5_1
LOC642980	cluster_5_1
LOC644450	cluster_5_1
LOC649294	cluster_5_1
LRRC10	cluster_5_1
LRRN2	cluster_5_1
LRRTM1	cluster_5_1
LYG1	cluster_5_1
LZTS3	cluster_5_1
MAG	cluster_5_1
MAGEA6	cluster_5_1
MAP9	cluster_5_1
MFAP5	cluster_5_1
MGAT5B	cluster_5_1
MOG	cluster_5_1
MRGPRE	cluster_5_1
MS4A1	cluster_5_1
MS4A5	cluster_5_1
MTURN	cluster_5_1
MUSK	cluster_5_1
MYCNOS	cluster_5_1
NANOS1	cluster_5_1
NBPF6	cluster_5_1
NCALD	cluster_5_1
NCAM2	cluster_5_1
NDUFB2-AS1	cluster_5_1
NFE2	cluster_5_1
NGEF	cluster_5_1
NLRP14	cluster_5_1
NR5A1	cluster_5_1
NTNG1	cluster_5_1
OLFM4	cluster_5_1
OR10J5	cluster_5_1
OR2AG2	cluster_5_1
OR4A15	cluster_5_1
OR5K3	cluster_5_1
OR7A17	cluster_5_1
OR7C2	cluster_5_1
OR7G2	cluster_5_1
OR8D1	cluster_5_1
OR8D2	cluster_5_1
P2RY2	cluster_5_1
P3H2	cluster_5_1
PANX3	cluster_5_1
PCNXL2	cluster_5_1
PCSK4	cluster_5_1
PDGFA	cluster_5_1
PDZD4	cluster_5_1
PITPNM3	cluster_5_1
PP12613	cluster_5_1
PRR19	cluster_5_1
PRR21	cluster_5_1
RAB14	cluster_5_1
RADIL	cluster_5_1
RGMB-AS1	cluster_5_1
RGS5	cluster_5_1
RIN1	cluster_5_1
RLTPR	cluster_5_1
RNF216	cluster_5_1
ROM1	cluster_5_1
RPL27A	cluster_5_1
RPP30	cluster_5_1
SCG3	cluster_5_1
SIK2	cluster_5_1
SLC16A11	cluster_5_1
SLC18A3	cluster_5_1
SLC25A34	cluster_5_1
SLC45A2	cluster_5_1
SMIM12	cluster_5_1
SMR3A	cluster_5_1
SNAI3-AS1	cluster_5_1
SPINK13	cluster_5_1
SPRR2E	cluster_5_1
SRSF12	cluster_5_1
STEAP4	cluster_5_1
SUN3	cluster_5_1
SV2A	cluster_5_1
TAAR8	cluster_5_1
THEG	cluster_5_1
TMEM151A	cluster_5_1
TMEM170B	cluster_5_1
TMEM191A	cluster_5_1
TMEM211	cluster_5_1
TMEM221	cluster_5_1
TMEM40	cluster_5_1
TMEM52	cluster_5_1
TMPO-AS1	cluster_5_1
TOLLIP	cluster_5_1
TPD52	cluster_5_1
TRAF3IP3	cluster_5_1
TRIM10	cluster_5_1
TRIM77	cluster_5_1
TSSK1B	cluster_5_1
TTC12	cluster_5_1
TXNDC15	cluster_5_1
TYMSOS	cluster_5_1
UGT3A1	cluster_5_1
UMODL1	cluster_5_1
UPB1	cluster_5_1
USP9X	cluster_5_1
VASH2	cluster_5_1
VPS53	cluster_5_1
WAS	cluster_5_1
ZGLP1	cluster_5_1
ZNF469	cluster_5_1
ZNF527	cluster_5_1
ZNF639	cluster_5_1
BTN1A1	cluster_4_4
FAM172A	cluster_4_4
LMOD1	cluster_4_4
LONRF2	cluster_4_4
MZB1	cluster_4_4
NFYA	cluster_4_4
PLA2G2D	cluster_4_4
TNFRSF10D	cluster_4_4
APBB1	cluster_4_3
BTNL8	cluster_4_3
C1orf194	cluster_4_3
C7orf34	cluster_4_3
CGB2	cluster_4_3
CHRFAM7A	cluster_4_3
CRNN	cluster_4_3
CSN1S1	cluster_4_3
DAB1	cluster_4_3
DCST2	cluster_4_3
ELN	cluster_4_3
FAM182A	cluster_4_3
FCRL2	cluster_4_3
FLJ42393	cluster_4_3
GFRA4	cluster_4_3
GPR158-AS1	cluster_4_3
GPR55	cluster_4_3
HYOU1	cluster_4_3
IL9R	cluster_4_3
KCNQ2	cluster_4_3
KIAA1683	cluster_4_3
KIR3DX1	cluster_4_3
KLK3	cluster_4_3
KRTAP4-8	cluster_4_3
LDLRAD4	cluster_4_3
LOC100130920	cluster_4_3
LYRM4-AS1	cluster_4_3
MSX2	cluster_4_3
OPN1SW	cluster_4_3
OPRL1	cluster_4_3
OR10P1	cluster_4_3
OR1D2	cluster_4_3
OR2B2	cluster_4_3
OR4X2	cluster_4_3
OR51G1	cluster_4_3
OR52I1	cluster_4_3
PCDHGB1	cluster_4_3
PRRG4	cluster_4_3
PTCH2	cluster_4_3
RAD51AP2	cluster_4_3
SFXN4	cluster_4_3
SGTA	cluster_4_3
SLC17A7	cluster_4_3
SLC22A20	cluster_4_3
TNK1	cluster_4_3
TP53TG3C	cluster_4_3
TRHR	cluster_4_3
TRPM3	cluster_4_3
TTTY13	cluster_4_3
WFDC9	cluster_4_3
ZNF578	cluster_4_3
ACTN3	cluster_4_2
AGER	cluster_4_2
ANKRD36	cluster_4_2
ATF3	cluster_4_2
C10orf76	cluster_4_2
C6orf106	cluster_4_2
CDC34	cluster_4_2
CDH7	cluster_4_2
CDK14	cluster_4_2
CENPP	cluster_4_2
CHD1L	cluster_4_2
CNN3	cluster_4_2
COL27A1	cluster_4_2
DEFB129	cluster_4_2
FLJ30064	cluster_4_2
GJD4	cluster_4_2
GOLIM4	cluster_4_2
GPC3	cluster_4_2
HNRNPCL1	cluster_4_2
HNRNPL	cluster_4_2
JRK	cluster_4_2
KATNB1	cluster_4_2
KCNH2	cluster_4_2
KRTAP4-11	cluster_4_2
LINC00637	cluster_4_2
LOC100130430	cluster_4_2
LOC727721	cluster_4_2
LYNX1	cluster_4_2
MDGA1	cluster_4_2
MYO1F	cluster_4_2
NRSN2	cluster_4_2
OTOA	cluster_4_2
PCDHA7	cluster_4_2
PDS5A	cluster_4_2
PIKFYVE	cluster_4_2
RASGRP4	cluster_4_2
RERG	cluster_4_2
RNF19B	cluster_4_2
RTN3	cluster_4_2
SLC16A4	cluster_4_2
SPTBN4	cluster_4_2
SRSF9	cluster_4_2
TCAF1	cluster_4_2
TEAD1	cluster_4_2
TMA16	cluster_4_2
TMEM82	cluster_4_2
TRIM21	cluster_4_2
WBP2	cluster_4_2
WDR48	cluster_4_2
WSB1	cluster_4_2
ACP7	cluster_4_1
ADAT2	cluster_4_1
AIDA	cluster_4_1
ALPP	cluster_4_1
ANP32C	cluster_4_1
ARX	cluster_4_1
ASIC4	cluster_4_1
ASXL2	cluster_4_1
ATP8B5P	cluster_4_1
BBX	cluster_4_1
BCL2L11	cluster_4_1
BCORP1	cluster_4_1
CAND1	cluster_4_1
CCHCR1	cluster_4_1
CEPT1	cluster_4_1
CHSY3	cluster_4_1
COQ10B	cluster_4_1
CORO1C	cluster_4_1
CSNK1G2	cluster_4_1
DDX11	cluster_4_1
DNAJC27-AS1	cluster_4_1
DPYSL4	cluster_4_1
ELF2	cluster_4_1
EVPL	cluster_4_1
FAM131C	cluster_4_1
FAM21C	cluster_4_1
FBXW4	cluster_4_1
FTHL17	cluster_4_1
HHEX	cluster_4_1
HNRNPH2	cluster_4_1
HSP90AB4P	cluster_4_1
IQCJ-SCHIP1	cluster_4_1
ITSN2	cluster_4_1
KIF21A	cluster_4_1
LHB	cluster_4_1
LINC01126	cluster_4_1
LOC100128851	cluster_4_1
LRIF1	cluster_4_1
MCM3AP-AS1	cluster_4_1
MYH14	cluster_4_1
NAPA	cluster_4_1
NBPF3	cluster_4_1
ND1	cluster_4_1
NUTF2	cluster_4_1
PARP1	cluster_4_1
PCDHA5	cluster_4_1
PCDHB13	cluster_4_1
PCGF2	cluster_4_1
PLIN5	cluster_4_1
PNISR	cluster_4_1
PPIB	cluster_4_1
PPM1K	cluster_4_1
PSMB8	cluster_4_1
PTBP1	cluster_4_1
RAC2	cluster_4_1
RBMY1B	cluster_4_1
REXO1L1P	cluster_4_1
RREB1	cluster_4_1
SEPT7P9	cluster_4_1
SMIM10L2A	cluster_4_1
SND1-IT1	cluster_4_1
SP140L	cluster_4_1
SPTLC2	cluster_4_1
STAG1	cluster_4_1
SUMO1P3	cluster_4_1
TBC1D17	cluster_4_1
TDRD1	cluster_4_1
TERC	cluster_4_1
TFAP4	cluster_4_1
TFF1	cluster_4_1
TMIGD2	cluster_4_1
TOMM20L	cluster_4_1
TRA2A	cluster_4_1
TRIM38	cluster_4_1
TTLL4	cluster_4_1
UBE2G2	cluster_4_1
URM1	cluster_4_1
VBP1	cluster_4_1
ZNF254	cluster_4_1
ZNF281	cluster_4_1
ZNF418	cluster_4_1
ZNF429	cluster_4_1
ZNF675	cluster_4_1
ZNF709	cluster_4_1
ZNF714	cluster_4_1
ZNF727	cluster_4_1
ZNF738	cluster_4_1
CASP8	cluster_3_3
CDK2	cluster_3_3
DDX3X	cluster_3_3
LOC100131541	cluster_3_3
MFSD14B	cluster_3_3
MORF4L2	cluster_3_3
PJA2	cluster_3_3
RBM47	cluster_3_3
THBS1	cluster_3_3
TRPM7	cluster_3_3
ACTR1B	cluster_3_2
ADAMTS1	cluster_3_2
ADCK4	cluster_3_2
ADD1	cluster_3_2
ADNP	cluster_3_2
ADNP2	cluster_3_2
AFF1	cluster_3_2
AKT1S1	cluster_3_2
ALDH1A2	cluster_3_2
ANKLE2	cluster_3_2
APH1A	cluster_3_2
API5	cluster_3_2
ARHGAP35	cluster_3_2
ARHGEF2	cluster_3_2
ARID4B	cluster_3_2
ARIH1	cluster_3_2
ARPC1B	cluster_3_2
ATG9A	cluster_3_2
ATP11B	cluster_3_2
ATP6V1B2	cluster_3_2
ATPAF1	cluster_3_2
AUP1	cluster_3_2
AURKB	cluster_3_2
BAG3	cluster_3_2
BRMS1L	cluster_3_2
BTG1	cluster_3_2
C14orf1	cluster_3_2
C16orf87	cluster_3_2
C6orf223	cluster_3_2
CAPS	cluster_3_2
CDC42BPA	cluster_3_2
CDIPT	cluster_3_2
CDKN1A	cluster_3_2
CDR2	cluster_3_2
CERK	cluster_3_2
CHST14	cluster_3_2
CIC	cluster_3_2
CIRBP	cluster_3_2
CLDN7	cluster_3_2
CLUH	cluster_3_2
CNOT11	cluster_3_2
COMT	cluster_3_2
COPE	cluster_3_2
COPS8	cluster_3_2
CPNE2	cluster_3_2
CRIP2	cluster_3_2
CRLF3	cluster_3_2
CROT	cluster_3_2
CXorf40B	cluster_3_2
CYTH2	cluster_3_2
DBNDD1	cluster_3_2
DCAF8	cluster_3_2
DHRS11	cluster_3_2
DPH6	cluster_3_2
DTX2	cluster_3_2
DVL3	cluster_3_2
EFNB2	cluster_3_2
EHBP1L1	cluster_3_2
EHF	cluster_3_2
EIF3G	cluster_3_2
ELOVL1	cluster_3_2
EML3	cluster_3_2
ENO1	cluster_3_2
EPHB2	cluster_3_2
ERGIC3	cluster_3_2
ERLIN1	cluster_3_2
ERLIN2	cluster_3_2
ETF1	cluster_3_2
EXTL2	cluster_3_2
FAM131A	cluster_3_2
FAM91A1	cluster_3_2
FBXO18	cluster_3_2
FMNL2	cluster_3_2
G6PD	cluster_3_2
GLCE	cluster_3_2
GLMN	cluster_3_2
GLO1	cluster_3_2
GLUD2	cluster_3_2
GNAQ	cluster_3_2
GPATCH1	cluster_3_2
GPR160	cluster_3_2
HDHD3	cluster_3_2
HMGN4	cluster_3_2
HUWE1	cluster_3_2
IL1R1	cluster_3_2
INO80	cluster_3_2
INPPL1	cluster_3_2
INTS5	cluster_3_2
IPO7	cluster_3_2
IRAK1	cluster_3_2
ITGA3	cluster_3_2
JUP	cluster_3_2
KAT7	cluster_3_2
KCTD18	cluster_3_2
KCTD5	cluster_3_2
KDM2A	cluster_3_2
KDSR	cluster_3_2
KIF2A	cluster_3_2
KIFC1	cluster_3_2
KIFC3	cluster_3_2
KLHL22	cluster_3_2
KRAS	cluster_3_2
LASP1	cluster_3_2
LOC220729	cluster_3_2
LOC401357	cluster_3_2
LONRF1	cluster_3_2
LPCAT4	cluster_3_2
LRRC41	cluster_3_2
LTBP3	cluster_3_2
LUZP1	cluster_3_2
LUZP6	cluster_3_2
MAD2L1	cluster_3_2
MAN1B1	cluster_3_2
MAP4K3	cluster_3_2
MAPK9	cluster_3_2
MAPKAPK2	cluster_3_2
MAT2A	cluster_3_2
MATR3	cluster_3_2
MAZ	cluster_3_2
MCU	cluster_3_2
MED28	cluster_3_2
MKI67	cluster_3_2
MLLT10	cluster_3_2
MPDU1	cluster_3_2
MRPL38	cluster_3_2
MRPS27	cluster_3_2
MSANTD2	cluster_3_2
MSL2	cluster_3_2
NADK	cluster_3_2
NADK2	cluster_3_2
NCOA5	cluster_3_2
NECAP1	cluster_3_2
NEO1	cluster_3_2
NRBP1	cluster_3_2
NT5DC2	cluster_3_2
NUP98	cluster_3_2
OBSL1	cluster_3_2
OSBPL8	cluster_3_2
PAPOLA	cluster_3_2
PBXIP1	cluster_3_2
PGPEP1	cluster_3_2
PHB2	cluster_3_2
PHF20L1	cluster_3_2
PIAS1	cluster_3_2
PITPNM1	cluster_3_2
PLCB3	cluster_3_2
PNO1	cluster_3_2
PNRC2	cluster_3_2
PPFIA1	cluster_3_2
PPME1	cluster_3_2
PPP5C	cluster_3_2
PRKACA	cluster_3_2
PRKAG1	cluster_3_2
PRKRIR	cluster_3_2
PRMT1	cluster_3_2
PSMG3	cluster_3_2
PTGES2	cluster_3_2
PTK2	cluster_3_2
PUM2	cluster_3_2
R3HDM4	cluster_3_2
RAB40C	cluster_3_2
RAB4B	cluster_3_2
RAB5A	cluster_3_2
RAI14	cluster_3_2
RB1CC1	cluster_3_2
RBM15B	cluster_3_2
RCC2	cluster_3_2
RCN2	cluster_3_2
RDX	cluster_3_2
RGL2	cluster_3_2
RNASE4	cluster_3_2
RNF10	cluster_3_2
RNF169	cluster_3_2
SDC4	cluster_3_2
SEC61A1	cluster_3_2
SERINC2	cluster_3_2
SF3B1	cluster_3_2
SHQ1	cluster_3_2
SIRT2	cluster_3_2
SKIL	cluster_3_2
SLC2A10	cluster_3_2
SLC30A9	cluster_3_2
SLC35B3	cluster_3_2
SLC50A1	cluster_3_2
SNAPC3	cluster_3_2
SNORA62	cluster_3_2
SNX33	cluster_3_2
SPIN3	cluster_3_2
STIM2	cluster_3_2
STXBP2	cluster_3_2
SUPT20H	cluster_3_2
SYNJ2	cluster_3_2
SYTL2	cluster_3_2
TAF15	cluster_3_2
TAX1BP3	cluster_3_2
TAZ	cluster_3_2
TBC1D22B	cluster_3_2
TECR	cluster_3_2
TJP2	cluster_3_2
TM9SF1	cluster_3_2
TMUB2	cluster_3_2
TNKS1BP1	cluster_3_2
TOR4A	cluster_3_2
TPM1	cluster_3_2
TRAPPC11	cluster_3_2
TRPC4AP	cluster_3_2
TTC14	cluster_3_2
TUBB	cluster_3_2
TUBG2	cluster_3_2
UAP1	cluster_3_2
UBE2E1	cluster_3_2
UNC119	cluster_3_2
USP21	cluster_3_2
UTP4	cluster_3_2
VDAC3	cluster_3_2
WBSCR16	cluster_3_2
WNT7A	cluster_3_2
WRB	cluster_3_2
XPO6	cluster_3_2
ZBED1	cluster_3_2
ZMAT3	cluster_3_2
ZNF566	cluster_3_2
ZNF853	cluster_3_2
ABCA2	cluster_3_1
ABHD2	cluster_3_1
ABHD3	cluster_3_1
ABI2	cluster_3_1
ABL1	cluster_3_1
ACAP2	cluster_3_1
ACER3	cluster_3_1
ACIN1	cluster_3_1
ACLY	cluster_3_1
ACTBL2	cluster_3_1
ACTN1	cluster_3_1
ACTN4	cluster_3_1
ADCK2	cluster_3_1
ADSS	cluster_3_1
AGK	cluster_3_1
AKAP10	cluster_3_1
ALCAM	cluster_3_1
ALKBH8	cluster_3_1
ANKIB1	cluster_3_1
ANLN	cluster_3_1
ANP32D	cluster_3_1
AP1AR	cluster_3_1
APEH	cluster_3_1
APMAP	cluster_3_1
APPL1	cluster_3_1
ARCN1	cluster_3_1
ARF1	cluster_3_1
ARGLU1	cluster_3_1
ARHGEF1	cluster_3_1
ARHGEF28	cluster_3_1
ARID4A	cluster_3_1
ARNT	cluster_3_1
ARSK	cluster_3_1
ASAP1	cluster_3_1
ATG16L1	cluster_3_1
ATP2C1	cluster_3_1
ATXN7L3B	cluster_3_1
AXIN1	cluster_3_1
B4GALT1	cluster_3_1
B4GALT5	cluster_3_1
BAP1	cluster_3_1
BCL2L1	cluster_3_1
BCL9	cluster_3_1
BCL9L	cluster_3_1
BECN1	cluster_3_1
BSG	cluster_3_1
BTBD10	cluster_3_1
C1orf115	cluster_3_1
C5orf22	cluster_3_1
CAB39	cluster_3_1
CALU	cluster_3_1
CAMK2N1	cluster_3_1
CANT1	cluster_3_1
CASC3	cluster_3_1
CAV2	cluster_3_1
CCDC117	cluster_3_1
CCND1	cluster_3_1
CCNG1	cluster_3_1
CCNG2	cluster_3_1
CCNK	cluster_3_1
CCNY	cluster_3_1
CD74	cluster_3_1
CD9	cluster_3_1
CD99	cluster_3_1
CDC37	cluster_3_1
CDC42EP3	cluster_3_1
CDC73	cluster_3_1
CDKAL1	cluster_3_1
CDYL	cluster_3_1
CEP85	cluster_3_1
CERS2	cluster_3_1
CHD1	cluster_3_1
CHD2	cluster_3_1
CHD4	cluster_3_1
CHPF2	cluster_3_1
CLINT1	cluster_3_1
CLPTM1	cluster_3_1
CNTRL	cluster_3_1
COLGALT1	cluster_3_1
COMMD2	cluster_3_1
COPG1	cluster_3_1
COPS7B	cluster_3_1
CREB3	cluster_3_1
CRK	cluster_3_1
CTCF	cluster_3_1
CTGF	cluster_3_1
CTSD	cluster_3_1
CXADR	cluster_3_1
DAPK1	cluster_3_1
DBF4	cluster_3_1
DBNL	cluster_3_1
DBR1	cluster_3_1
DCAF12	cluster_3_1
DCTD	cluster_3_1
DDOST	cluster_3_1
DDX39B	cluster_3_1
DDX3Y	cluster_3_1
DEPDC1	cluster_3_1
DERL1	cluster_3_1
DHX40	cluster_3_1
DLG1	cluster_3_1
DNA2	cluster_3_1
DNAJB14	cluster_3_1
DNM2	cluster_3_1
DPY19L1P1	cluster_3_1
DPYSL2	cluster_3_1
DST	cluster_3_1
DUSP3	cluster_3_1
DUSP5	cluster_3_1
DYNC1LI2	cluster_3_1
ECE1	cluster_3_1
EDEM1	cluster_3_1
EEF2	cluster_3_1
EGLN2	cluster_3_1
EHBP1	cluster_3_1
EI24	cluster_3_1
EIF4G1	cluster_3_1
EIF5A	cluster_3_1
ELAVL1	cluster_3_1
ELF3	cluster_3_1
ELOF1	cluster_3_1
ENSA	cluster_3_1
EPB41L2	cluster_3_1
EPS8	cluster_3_1
ERMP1	cluster_3_1
ESRP1	cluster_3_1
ESYT1	cluster_3_1
ETV4	cluster_3_1
EXD2	cluster_3_1
EXOC6B	cluster_3_1
EXOSC6	cluster_3_1
FADS3	cluster_3_1
FAM135A	cluster_3_1
FAM168B	cluster_3_1
FAM193B	cluster_3_1
FAM3C	cluster_3_1
FAM72A	cluster_3_1
FAM72D	cluster_3_1
FAR1	cluster_3_1
FAT1	cluster_3_1
FAT4	cluster_3_1
FBXO3	cluster_3_1
FEM1A	cluster_3_1
FGFR4	cluster_3_1
FGFRL1	cluster_3_1
FIGNL1	cluster_3_1
FOXK1	cluster_3_1
FOXN3	cluster_3_1
FOXRED1	cluster_3_1
FRYL	cluster_3_1
FUBP3	cluster_3_1
FURIN	cluster_3_1
FUS	cluster_3_1
FXR2	cluster_3_1
FXYD5	cluster_3_1
GABARAP	cluster_3_1
GALNT11	cluster_3_1
GALNT12	cluster_3_1
GALNT2	cluster_3_1
GATAD2A	cluster_3_1
GCH1	cluster_3_1
GDI2	cluster_3_1
GEMIN5	cluster_3_1
GLE1	cluster_3_1
GLTP	cluster_3_1
GLUD1	cluster_3_1
GMPPA	cluster_3_1
GNA11	cluster_3_1
GNB1	cluster_3_1
GNB2	cluster_3_1
GOLGA8T	cluster_3_1
GOLPH3	cluster_3_1
GPRC5A	cluster_3_1
GRAMD1A	cluster_3_1
GRINA	cluster_3_1
GTF3C1	cluster_3_1
H1FX	cluster_3_1
H6PD	cluster_3_1
HES1	cluster_3_1
HIBADH	cluster_3_1
HIST1H4L	cluster_3_1
HMCES	cluster_3_1
HMGB1	cluster_3_1
HNRNPAB	cluster_3_1
HPCAL1	cluster_3_1
IDH3A	cluster_3_1
IGF2R	cluster_3_1
IGFBP3	cluster_3_1
IGFBP4	cluster_3_1
IRF2	cluster_3_1
IST1	cluster_3_1
KAT6B	cluster_3_1
KCTD14	cluster_3_1
KDELR1	cluster_3_1
KDM1A	cluster_3_1
KDM1B	cluster_3_1
KDM2B	cluster_3_1
KIAA0319L	cluster_3_1
KIAA0930	cluster_3_1
KLHDC3	cluster_3_1
KXD1	cluster_3_1
L1CAM	cluster_3_1
LARS	cluster_3_1
LBH	cluster_3_1
LDLRAD3	cluster_3_1
LGMN	cluster_3_1
LITAF	cluster_3_1
LMAN2	cluster_3_1
LOC100133050	cluster_3_1
LOC100190986	cluster_3_1
LOC148709	cluster_3_1
LOC441455	cluster_3_1
LRCH1	cluster_3_1
LRP10	cluster_3_1
LRP11	cluster_3_1
LRP12	cluster_3_1
LRRC58	cluster_3_1
LSM4	cluster_3_1
LTN1	cluster_3_1
LY6E	cluster_3_1
M6PR	cluster_3_1
MAFK	cluster_3_1
MAGED2	cluster_3_1
MAN2C1	cluster_3_1
MANSC1	cluster_3_1
MARCH7	cluster_3_1
MATN3	cluster_3_1
MDN1	cluster_3_1
MED1	cluster_3_1
MED23	cluster_3_1
METTL14	cluster_3_1
MFHAS1	cluster_3_1
MFSD9	cluster_3_1
MICALL1	cluster_3_1
MIF4GD	cluster_3_1
MINK1	cluster_3_1
MINPP1	cluster_3_1
MKL1	cluster_3_1
MKRN7P	cluster_3_1
MN1	cluster_3_1
MOV10	cluster_3_1
MRPS18A	cluster_3_1
MSMO1	cluster_3_1
MTA1	cluster_3_1
MTM1	cluster_3_1
MTPN	cluster_3_1
MYBL2	cluster_3_1
MYEF2	cluster_3_1
MYL9	cluster_3_1
NAA40	cluster_3_1
NAF1	cluster_3_1
NBN	cluster_3_1
NBPF10	cluster_3_1
NEDD9	cluster_3_1
NEK1	cluster_3_1
NEK2	cluster_3_1
NEK7	cluster_3_1
NFATC2IP	cluster_3_1
NFKBIZ	cluster_3_1
NFRKB	cluster_3_1
NMD3	cluster_3_1
NMUR2	cluster_3_1
NPEPPS	cluster_3_1
NPTN	cluster_3_1
NRBF2	cluster_3_1
NSMCE3	cluster_3_1
NUCB1	cluster_3_1
NUDT15	cluster_3_1
NUDT19	cluster_3_1
NUMA1	cluster_3_1
NUP210	cluster_3_1
OPN3	cluster_3_1
PACSIN2	cluster_3_1
PATZ1	cluster_3_1
PDIA3	cluster_3_1
PDIA6	cluster_3_1
PEA15	cluster_3_1
PEF1	cluster_3_1
PFKL	cluster_3_1
PFN2	cluster_3_1
PGRMC2	cluster_3_1
PIGY	cluster_3_1
PIK3AP1	cluster_3_1
PIK3CB	cluster_3_1
PIK3R1	cluster_3_1
PITHD1	cluster_3_1
PKN1	cluster_3_1
PKN2	cluster_3_1
POFUT2	cluster_3_1
POLD2	cluster_3_1
POT1	cluster_3_1
PPM1A	cluster_3_1
PPM1H	cluster_3_1
PPP1R11	cluster_3_1
PPP4C	cluster_3_1
PRCC	cluster_3_1
PRDX3	cluster_3_1
PRKCSH	cluster_3_1
PROSC	cluster_3_1
PRPF4	cluster_3_1
PRR16	cluster_3_1
PSAP	cluster_3_1
PSENEN	cluster_3_1
PSMA3-AS1	cluster_3_1
PSMD3	cluster_3_1
PTGES3	cluster_3_1
PTK7	cluster_3_1
PTP4A2	cluster_3_1
PTPN9	cluster_3_1
PXDC1	cluster_3_1
RAB11B	cluster_3_1
RAB29	cluster_3_1
RAB5B	cluster_3_1
RANBP6	cluster_3_1
RAP1BP1	cluster_3_1
RAP1GAP2	cluster_3_1
RAP2A	cluster_3_1
RARRES1	cluster_3_1
RASA1	cluster_3_1
RBM3	cluster_3_1
RDH13	cluster_3_1
RFC3	cluster_3_1
RFWD3	cluster_3_1
RHOC	cluster_3_1
RIC8A	cluster_3_1
RNF20	cluster_3_1
RNF40	cluster_3_1
RNF8	cluster_3_1
RPL7L1	cluster_3_1
RPN1	cluster_3_1
RRM2	cluster_3_1
RYBP	cluster_3_1
SAMD1	cluster_3_1
SCOC	cluster_3_1
SDF4	cluster_3_1
SEC16A	cluster_3_1
SEC24D	cluster_3_1
SECISBP2L	cluster_3_1
SELT	cluster_3_1
SEMA4B	cluster_3_1
SEPT6	cluster_3_1
SEPT7	cluster_3_1
SERPINE2	cluster_3_1
SF3B4	cluster_3_1
SGPP1	cluster_3_1
SH3BP4	cluster_3_1
SH3BP5	cluster_3_1
SH3GLB2	cluster_3_1
SHKBP1	cluster_3_1
SHOC2	cluster_3_1
SIAH1	cluster_3_1
SIRT7	cluster_3_1
SLC15A4	cluster_3_1
SLC1A5	cluster_3_1
SLC25A17	cluster_3_1
SLC30A7	cluster_3_1
SLC35A5	cluster_3_1
SLC35G1	cluster_3_1
SLC39A1	cluster_3_1
SLC39A6	cluster_3_1
SLC39A7	cluster_3_1
SLC3A2	cluster_3_1
SLC44A4	cluster_3_1
SLC4A2	cluster_3_1
SLC7A5	cluster_3_1
SMARCD2	cluster_3_1
SMS	cluster_3_1
SNRNP48	cluster_3_1
SNRNP70	cluster_3_1
SNRPB	cluster_3_1
SNX9	cluster_3_1
SOCS3	cluster_3_1
SOX4	cluster_3_1
SOX9	cluster_3_1
SPAG1	cluster_3_1
SPATS2	cluster_3_1
SRCAP	cluster_3_1
SRP68	cluster_3_1
SS18	cluster_3_1
SSR2	cluster_3_1
ST14	cluster_3_1
ST3GAL1	cluster_3_1
STAT3	cluster_3_1
STIL	cluster_3_1
STK38	cluster_3_1
STOML2	cluster_3_1
SUN2	cluster_3_1
SUPT16H	cluster_3_1
TAF11	cluster_3_1
TAF2	cluster_3_1
TBC1D4	cluster_3_1
TBL1XR1	cluster_3_1
TES	cluster_3_1
TFAM	cluster_3_1
TGIF2	cluster_3_1
THOC1	cluster_3_1
THOC6	cluster_3_1
TIFA	cluster_3_1
TIMM44	cluster_3_1
TINAGL1	cluster_3_1
TM2D3	cluster_3_1
TMCO3	cluster_3_1
TMED9	cluster_3_1
TMEM165	cluster_3_1
TMEM2	cluster_3_1
TMEM231	cluster_3_1
TMEM47	cluster_3_1
TMEM56	cluster_3_1
TMTC2	cluster_3_1
TNFRSF12A	cluster_3_1
TNKS2	cluster_3_1
TNPO3	cluster_3_1
TOB1	cluster_3_1
TOP1P2	cluster_3_1
TOP2A	cluster_3_1
TOX3	cluster_3_1
TP53INP2	cluster_3_1
TPBG	cluster_3_1
TRABD	cluster_3_1
TRIM2	cluster_3_1
TRIP10	cluster_3_1
TRNP1	cluster_3_1
TSPAN13	cluster_3_1
TTC31	cluster_3_1
TTC4	cluster_3_1
TTYH3	cluster_3_1
TYW1B	cluster_3_1
UBE2D1	cluster_3_1
UBE2E3	cluster_3_1
UBXN4	cluster_3_1
UGCG	cluster_3_1
UGT1A8	cluster_3_1
UHRF2	cluster_3_1
USP28	cluster_3_1
USP43	cluster_3_1
USP44	cluster_3_1
USP6	cluster_3_1
USP8	cluster_3_1
UTP20	cluster_3_1
UXS1	cluster_3_1
VEPH1	cluster_3_1
VPRBP	cluster_3_1
WDFY1	cluster_3_1
WDR1	cluster_3_1
WDR20	cluster_3_1
WDR82	cluster_3_1
XPO1	cluster_3_1
XPOT	cluster_3_1
XRN2	cluster_3_1
YARS	cluster_3_1
ZBTB6	cluster_3_1
ZC3H13	cluster_3_1
ZDHHC18	cluster_3_1
ZDHHC7	cluster_3_1
ZFP91	cluster_3_1
ZNF217	cluster_3_1
ZNF451	cluster_3_1
ZNF468	cluster_3_1
ZNF644	cluster_3_1
ZNF711	cluster_3_1
ZNF76	cluster_3_1
ZNF800	cluster_3_1
AHCY	cluster_2_2
AKAP2	cluster_2_2
ALKBH5	cluster_2_2
AP2A1	cluster_2_2
AP2B1	cluster_2_2
ARID1A	cluster_2_2
CAPN1	cluster_2_2
CAPZA2	cluster_2_2
CCDC47	cluster_2_2
CNN2	cluster_2_2
CSK	cluster_2_2
CYP24A1	cluster_2_2
DDX42	cluster_2_2
DSG2	cluster_2_2
E2F4	cluster_2_2
EDIL3	cluster_2_2
ELK1	cluster_2_2
ENC1	cluster_2_2
GNPDA1	cluster_2_2
HCFC1	cluster_2_2
HMGA1P8	cluster_2_2
HOXB3	cluster_2_2
HSP90AB2P	cluster_2_2
ITGB6	cluster_2_2
LOC401585	cluster_2_2
LOC645752	cluster_2_2
LSM12	cluster_2_2
MAF1	cluster_2_2
MARCKSL1	cluster_2_2
MAT2B	cluster_2_2
MLF2	cluster_2_2
MTMR12	cluster_2_2
NUP160	cluster_2_2
POLE	cluster_2_2
POTEKP	cluster_2_2
PPP1CA	cluster_2_2
PRKDC	cluster_2_2
PRMT3	cluster_2_2
PROM1	cluster_2_2
PRUNE	cluster_2_2
RBM25	cluster_2_2
SDCBPP2	cluster_2_2
SLC39A10	cluster_2_2
SLC6A6	cluster_2_2
SLC7A6	cluster_2_2
SMARCA2	cluster_2_2
SMARCC1	cluster_2_2
SPRED2	cluster_2_2
STIP1	cluster_2_2
TAGLN2	cluster_2_2
TOMM40	cluster_2_2
TOMM70A	cluster_2_2
TVP23C	cluster_2_2
UBQLN4	cluster_2_2
USP5	cluster_2_2
YWHAEP1	cluster_2_2
ACBD3	cluster_2_1
APAF1	cluster_2_1
BARX2	cluster_2_1
BAZ2A	cluster_2_1
CAP1	cluster_2_1
CDC14B	cluster_2_1
CFL1	cluster_2_1
CSNK1A1	cluster_2_1
CTSC	cluster_2_1
EP300	cluster_2_1
EPHA2	cluster_2_1
EXOC5	cluster_2_1
GLUL	cluster_2_1
GLYR1	cluster_2_1
LMAN1	cluster_2_1
NBPF14	cluster_2_1
POTEE	cluster_2_1
POTEM	cluster_2_1
PPP2R1A	cluster_2_1
PPTC7	cluster_2_1
PRRC2A	cluster_2_1
RARB	cluster_2_1
RNPS1	cluster_2_1
RPL36A-HNRNPH2	cluster_2_1
SMAD4	cluster_2_1
SRF	cluster_2_1
TMPO	cluster_2_1
TOP1	cluster_2_1
YWHAE	cluster_2_1
ARL6IP1	cluster_1_1
CD46	cluster_1_1
ETS1	cluster_1_1
GSPT1	cluster_1_1
HSP90AA2P	cluster_1_1
ITGB1	cluster_1_1
POTEF	cluster_1_1
TXNRD1	cluster_1_1
ZBTB18	cluster_1_1

## Sheet: Table S4
Table S4. Coefficients from LASSO model
Response gene symbols	TF gene symbols	LASSO coefficients
ABCA2	CIC	0.291895
ABCA2	ELK4	0.116845
ABCA2	FOXO4	0.00170279
ABCA2	IRF1	0.105222
ABCA2	KLF4	0.132455
ABCA2	NCOR1	0.0385607
ABCA2	STAT3	0.0670228
ABCA2	ZBTB18	0.138822
ABCA2	ZNF169	-0.326897
ABCA2	ZNF213	0.0089994
ABHD13	DAXX	-0.32305
ABHD13	MBD1	0.101514
ABHD13	NFE2L2	0.00868913
ABHD13	NONO	-0.143022
ABHD13	PGBD1	0.000697297
ABHD13	SP140	0.0206141
ABHD13	TBX3	3.19526e-05
ABHD13	ZNF367	0.227114
ABHD13	ZNF417	0.0786365
ABHD13	ZNF90	0.149661
ABHD13	ZNF92	0.00939572
ABHD13	ZSCAN9	-0.168814
ABHD2	HMGB2	-0.134399
ABHD2	KLLN	-0.0440771
ABHD2	LITAF	0.0217616
ABHD2	LRRFIP1	0.755565
ABHD2	MKL1	0.461463
ABHD2	YY2	-0.0217619
ABHD2	ZNF410	1.04237
ABHD3	CDC73	0.0572264
ABHD3	DMRTA1	0.0972697
ABHD3	EGR1	-0.0296273
ABHD3	HDAC8	0.00179712
ABHD3	HMGB1	0.1844
ABHD3	MTF2	0.0187014
ABHD3	MUC1	-0.00758702
ABHD3	PITX1	-0.296595
ABHD3	PLAGL1	0.0117133
ABHD3	RFXAP	0.0448339
ABHD3	SCP2	0.235433
ABHD3	SOX9	0.0304365
ABHD3	TADA3	-0.243828
ABHD3	VDR	-0.0109035
ABI2	BAZ2A	0.0887214
ABI2	CERS2	0.0149644
ABI2	CHD2	0.019296
ABI2	HMGB1	0.49443
ABI2	RBFOX2	-0.0147429
ABI2	RFXAP	0.180258
ABI2	SMAD4	0.130113
ABI2	TAF6	-0.24269
ABI2	TGIF2	4.54015e-05
ABI2	ZIC1	-0.0983582
ABI2	ZNF143	-0.0144039
ACAP2	CNBP	0.709467
ACAP2	CTCF	0.24198
ACAP2	FOXK2	-0.000164707
ACAP2	FOXN3	0.246329
ACAP2	LHX2	-0.0382035
ACAP2	NFKB2	0.014206
ACAP2	PITX1	-0.0346101
ACAP2	SCP2	0.236524
ACAP2	SMC3	0.00141723
ACAP2	STIL	0.0492956
ACAP2	SUPT4H1	-0.0122201
ACAP2	YAP1	0.136724
ACAP2	ZBTB33	0.117502
ACAP2	ZNF3	0.172979
ACBD3	BCL11A	-0.000702225
ACBD3	CREB3	0.149564
ACBD3	EGFR	-0.313013
ACBD3	EP300	0.0802913
ACBD3	FOXK1	0.426445
ACBD3	HMGB1	0.099035
ACBD3	HNRNPD	0.401331
ACBD3	MAF1	0.154216
ACBD3	MKL1	0.0412691
ACBD3	MYNN	0.224156
ACBD3	PHC1	-0.285773
ACBD3	PITX1	-0.127568
ACBD3	SMAD4	0.076214
ACBD3	TAF11	0.000257109
ACBD3	VDR	-0.000422958
ACBD3	ZGLP1	-0.000404519
ACE2	BATF2	0.0553192
ACE2	FOXO3	0.760588
ACE2	LMO2	0.365351
ACE2	MSL3	-0.0434027
ACE2	STAT4	0.0368384
ACE2	ZKSCAN7	0.267189
ACER3	ETS1	0.0120595
ACER3	HOXA3	-0.403915
ACER3	HOXC6	-0.503913
ACER3	MUC1	-0.0392384
ACER3	RFX1	-0.167775
ACER3	RHOXF1	-0.0376025
ACER3	SRF	0.13622
ACER3	TFAM	0.0468105
ACER3	ZBTB2	0.00432113
ACER3	ZNF18	-0.208937
ACER3	ZNF444	-0.0726633
ACIN1	BRF2	1.34952
ACIN1	CEBPZ	-0.235628
ACIN1	DMBX1	0.136009
ACIN1	GTF2H3	-0.000623248
ACIN1	HINFP	0.228953
ACIN1	NFE2L1	0.962203
ACIN1	NOTO	-0.415732
ACIN1	RXRG	-0.00445076
ACIN1	TPRX1	-0.601316
ACIN1	TRIM28	0.159688
ACKR1	FOXJ2	-0.0445356
ACKR1	IRF5	0.00841877
ACKR1	LHX1	0.308489
ACKR1	NCL	-0.28062
ACKR1	NOTO	0.352325
ACKR1	NR5A1	0.191349
ACKR1	SUPT4H1	0.242018
ACKR1	TPRX1	0.0630149
ACKR1	ZNF71	0.261897
ACKR1	ZNF93	-0.4925
ACLY	AFF1	0.016988
ACLY	ATF2	0.0124592
ACLY	BARX2	0.102119
ACLY	FBXW7	-0.0528376
ACLY	HDAC8	0.000675041
ACLY	IRX5	-0.145233
ACLY	MAFG	-0.189947
ACLY	MAZ	0.0380258
ACLY	MTA1	0.108685
ACLY	MUC1	-0.113584
ACLY	POLR2A	-0.19352
ACLY	TSC22D1	-0.31071
ACLY	ZKSCAN5	-0.322826
ACLY	ZNF219	-0.085492
ACTBL2	ATF2	0.0835134
ACTBL2	CREB1	0.41883
ACTBL2	FBXW7	-0.353376
ACTBL2	FOXD4	-1.12491
ACTBL2	MAZ	0.042994
ACTBL2	MTA1	0.304107
ACTBL2	MUC1	-0.204142
ACTBL2	POU4F2	-0.00523325
ACTBL2	RUNX3	-0.0100177
ACTBL2	SCAND1	0.739395
ACTBL2	ZKSCAN5	-0.00669378
ACTBL2	ZNF219	-0.116914
ACTBL2	ZNF281	0.627924
ACTG1P4	CDK7	-0.492754
ACTG1P4	KLF17	0.151701
ACTG1P4	LHX3	0.655326
ACTG1P4	LIN9	-0.614841
ACTG1P4	PHF14	-0.484022
ACTG1P4	SOX13	-0.105494
ACTG1P4	TAF1B	-0.116059
ACTG1P4	TXK	-0.0339635
ACTG1P4	ZBTB16	0.0236971
ACTG1P4	ZNF155	1.16341
ACTG1P4	ZNF157	0.000401683
ACTG1P4	ZNF83	-0.0917699
ACTN1	BHLHE40	0.150292
ACTN1	CERS2	0.178429
ACTN1	GATAD2A	0.0704777
ACTN1	GTF2H4	0.00859623
ACTN1	HNRNPAB	0.350679
ACTN1	KLF6	0.0070863
ACTN1	MN1	0.0858545
ACTN1	NUP133	-0.0042018
ACTN1	PDIA3	0.00270029
ACTN1	PHTF1	-0.132452
ACTN1	SATB2	-0.288589
ACTN1	TGIF2	6.64821e-05
ACTN1	ZHX1	0.0112527
ACTN1	ZNF500	0.302518
ACTN1	ZNF639	-0.00145457
ACTN4	BAZ1B	0.115651
ACTN4	CEBPZ	-0.000120009
ACTN4	CERS2	0.0334237
ACTN4	DLX6	-0.307135
ACTN4	EGFR	-0.0426864
ACTN4	ELL	0.410034
ACTN4	IRF2BP1	0.052595
ACTN4	IRF3	0.383539
ACTN4	MN1	0.054123
ACTN4	PDIA3	3.95338e-05
ACTN4	RARG	0.137628
ACTN4	SATB2	-0.179569
ACTN4	TEAD1	0.00939782
ACTN4	TRIM28	0.326165
ACTN4	ZNF169	-0.066847
ACTR1B	AATF	0.145529
ACTR1B	CREB3	0.295266
ACTR1B	ENO1	0.275823
ACTR1B	GTF3A	-0.119744
ACTR1B	HNRNPA2B1	0.287538
ACTR1B	MYNN	0.320804
ACTR1B	RUNX3	-0.00891548
ACTR1B	VDR	-0.02681
ACTR1B	ZNF213	0.0361715
ADAMTS1	FOXN1	-0.0897533
ADAMTS1	MAFF	0.247187
ADAMTS1	NAB1	0.128014
ADAMTS1	PAXBP1	0.279831
ADAMTS1	PBX2	0.0230049
ADAMTS1	SKIL	0.13952
ADAMTS1	SP2	0.0500872
ADAMTS1	ZNF282	0.0163616
ADAMTS1	ZNF45	0.38152
ADPRH	BMPR1A	0.0368474
ADPRH	BRF2	-0.0205991
ADPRH	DAXX	-0.053563
ADPRH	IRF8	0.0460672
ADPRH	KDM1A	-0.0330416
ADPRH	MBD1	0.183129
ADPRH	NAA15	0.0655303
ADPRH	NFE2L2	2.1146e-05
ADPRH	NR4A1	0.00773654
ADPRH	POLR2A	0.608594
ADPRH	POU3F2	0.0320376
ADPRH	RNF10	-0.480291
ADPRH	SUPT20H	-0.0207982
ADPRH	TBX3	7.73776e-05
ADPRH	TLX3	0.243181
ADPRH	ZNF417	0.152565
ADPRH	ZSCAN9	-0.0282001
ADSS	AFF1	0.0128643
ADSS	HMGB1	0.0966374
ADSS	HOXB3	0.0298095
ADSS	KDM1A	0.067811
ADSS	LHX1	-0.0321138
ADSS	LMO7	5.22061e-05
ADSS	MED1	0.0461718
ADSS	PHC1	-0.369599
ADSS	PITX1	-0.117243
ADSS	RORB	-0.0580845
ADSS	SHOX2	0.0068649
ADSS	SLC30A9	0.120811
ADSS	TAF6	-0.266356
ADSS	TCERG1	0.177989
AGAP7P	BLZF1	0.000989749
AGAP7P	CDX1	0.173385
AGAP7P	CTBP1	-0.319524
AGAP7P	FOXB1	0.0426881
AGAP7P	FUBP1	0.00175583
AGAP7P	LMX1B	0.157027
AGAP7P	NR4A1	0.0337572
AGAP7P	TFEB	0.247486
AGAP7P	TRIM25	0.226348
AGAP7P	YY2	0.0505117
AGK	ADNP2	0.0824355
AGK	BARX2	0.0605482
AGK	CDC73	0.115552
AGK	EGR1	-0.359627
AGK	GTF2H4	0.148611
AGK	HES1	0.0706534
AGK	HNRNPD	0.239936
AGK	JUND	0.0724851
AGK	PHC1	-0.0286025
AGK	POU5F1	-1.14871e-05
AGK	STAT3	0.231757
AGK	VDR	-0.000178153
AGK	ZFAT	-0.0606784
AHCY	ABL1	0.000294367
AHCY	CREB3	0.33251
AHCY	CUX1	0.89254
AHCY	ETV4	0.153566
AHCY	GATAD2B	-0.00422068
AHCY	HCFC1	0.0210549
AHCY	HDAC8	0.28896
AHCY	MAF1	0.0367982
AHCY	MYNN	0.357855
AHCY	SKIL	0.00070042
AHCY	SLC30A9	0.310403
AKAP10	ADNP2	0.058602
AKAP10	AFF1	0.36562
AKAP10	ARID4A	0.0945484
AKAP10	CHD2	0.0466565
AKAP10	HMGB1	0.00210392
AKAP10	KAT7	0.015952
AKAP10	MED1	0.140041
AKAP10	NONO	0.0631074
AKAP10	NUP98	0.0284091
AKAP10	PDHX	0.00250149
AKAP10	TAF6	-0.402056
AKAP10	ZNF41	0.0150825
AKAP2	ADNP2	0.619212
AKAP2	BUD31	0.856037
AKAP2	CHCHD3	0.126758
AKAP2	DMRTC1	-0.0378971
AKAP2	HOXA3	-0.291234
AKAP2	MN1	0.295881
AKAP2	MTA1	0.184043
AKAP2	NRF1	0.105901
AKAP2	TCF20	0.143909
AKT1S1	CDK9	-0.00590375
AKT1S1	CIC	0.225804
AKT1S1	FUBP1	-0.160984
AKT1S1	GATAD2B	-0.00600017
AKT1S1	IRX3	-0.147431
AKT1S1	JUNB	0.0179575
AKT1S1	MAZ	0.141451
AKT1S1	MYPOP	0.0362067
AKT1S1	OAZ1	-0.0787856
AKT1S1	REST	0.0320356
AKT1S1	ZNF395	0.0503447
AKT1S1	ZNF41	0.00314532
AKT1S1	ZSCAN12	0.311967
ALCAM	BCL11A	-0.0559698
ALCAM	CNBP	0.197731
ALCAM	CREB3	0.232346
ALCAM	EP300	0.00149762
ALCAM	FOXK1	0.0179001
ALCAM	HMGB1	0.0745807
ALCAM	HNRNPD	0.00913009
ALCAM	SMAD4	0.0145613
ALCAM	SUPT16H	0.0524273
ALCAM	TAF11	0.0105961
ALCAM	ZGLP1	-0.122737
ALCAM	ZNF410	0.156734
ALDH1A2	CTCF	0.0345477
ALDH1A2	ENO1	0.071154
ALDH1A2	FOXJ2	0.0149661
ALDH1A2	KAT7	0.276703
ALDH1A2	NFATC3	0.160167
ALDH1A2	SLC30A9	0.243185
ALDH1A2	SUPT4H1	-0.183367
ALDH1A2	TLX3	-0.0481321
ALG10	E2F2	0.0512963
ALG10	EGFR	0.39494
ALG10	GTF2H4	-0.000263913
ALG10	GTF3A	0.0233725
ALG10	NAA15	0.486149
ALG10	NCOR1	-0.00326491
ALG10	PHF1	-0.0282807
ALG10	RNF10	-0.0954176
ALG10	SREBF2	-0.0188193
ALG10	TAF11	-0.0397833
ALG10	TSC22D1	0.0398983
ALG10	ZIC1	0.101974
ALG10	ZNF169	0.186888
ALG10	ZNF417	0.0404859
ALKBH5	BMPR1A	-0.00651139
ALKBH5	CEBPZ	-0.370879
ALKBH5	CERS2	0.672398
ALKBH5	DLX6	-0.441235
ALKBH5	E2F8	-0.0588412
ALKBH5	GRHL1	-0.267375
ALKBH5	PDIA3	0.165441
ALKBH5	SIM2	0.00913653
ALKBH5	SSB	0.936248
ALKBH5	UBE2V1	0.50503
ALKBH5	ZNF500	0.0844337
ALKBH8	ATF5	0.289618
ALKBH8	CDKN1A	0.150948
ALKBH8	FOXC1	-0.0764269
ALKBH8	GATAD2A	0.132433
ALKBH8	NEO1	0.0105039
ALKBH8	NRL	-0.216983
ALKBH8	OAZ1	-0.104584
ALKBH8	TFAM	0.10093
ALKBH8	ZSCAN30	0.225592
AMPD3	CRTC2	0.045699
AMPD3	ID1	0.462662
AMPD3	LHX2	0.276428
AMPD3	NKX2-5	0.560848
AMPD3	NOTCH1	0.261525
AMPD3	SH2D1A	-0.22229
AMPD3	SMAD2	-0.0684164
AMPD3	YAP1	-0.508109
AMPD3	YY2	0.0326978
AMPD3	ZBTB17	0.347293
AMPD3	ZNF3	-0.019478
ANK2	BRF2	-0.108045
ANK2	CERS2	-0.145404
ANK2	FOXB1	0.566541
ANK2	FOXJ2	-0.00630955
ANK2	GTF2H3	0.0910248
ANK2	ID1	0.930823
ANK2	LHX2	0.0750103
ANK2	MAF	0.00830576
ANK2	NCL	-0.172464
ANK2	NFKB2	-0.192147
ANK2	PLAGL1	-0.000336542
ANK2	SREBF2	-0.0532824
ANK2	TAB1	-0.0728567
ANK2	TPRX1	0.363301
ANK2	ZNF213	-0.0506957
ANKFY1	CTBP2	0.646841
ANKFY1	GATA3	0.236929
ANKFY1	HDAC8	-0.108388
ANKFY1	HOXA1	0.13449
ANKFY1	LMO2	0.0741081
ANKFY1	NKX2-1	0.216082
ANKFY1	PCBP2	-0.154536
ANKFY1	SH2D1A	-0.128847
ANKFY1	SP140	0.165884
ANKFY1	TRIM25	0.147475
ANKFY1	ZNF417	1.55086e-05
ANKIB1	AFF1	0.126851
ANKIB1	AHR	0.277926
ANKIB1	CHD2	0.230069
ANKIB1	DMRTA1	0.018357
ANKIB1	HMGN1	0.374619
ANKIB1	ISL1	0.0782441
ANKIB1	LMO7	0.361839
ANKIB1	MAFG	-7.01415e-06
ANKIB1	MED1	0.0740564
ANKIB1	NRL	-0.110114
ANKIB1	NUP98	0.000904291
ANKIB1	SCP2	0.210716
ANKIB1	SCYL1	-7.37878e-05
ANKIB1	ZGLP1	-0.445343
ANKIB1	ZSCAN5B	-0.100509
ANKLE2	CERS6	0.112197
ANKLE2	ETV4	0.294461
ANKLE2	IGHMBP2	0.0843758
ANKLE2	NCL	0.0921565
ANKLE2	NRL	-0.21765
ANKLE2	PBX2	0.0523196
ANKLE2	SKIL	0.169941
ANKLE2	ZNF267	0.218166
ANKLE2	ZNF282	0.0372917
ANKLE2	ZNF45	0.00578808
ANKRD37	ELF3	-0.00839147
ANKRD37	HLTF	-0.54812
ANKRD37	HNF1B	-0.12363
ANKRD37	ID3	-0.010664
ANKRD37	MBD1	0.0151435
ANKRD37	NACC1	0.0928254
ANKRD37	PAX9	0.00573623
ANKRD37	POLR2G	0.0281169
ANKRD37	PPARA	-0.00533118
ANKRD37	TAF1	-0.128409
ANKRD37	ZNF174	0.373004
ANKRD37	ZNF92	0.0396835
ANKRD37	ZSCAN5A	0.420747
ANLN	FOXK2	-0.711096
ANLN	FOXN3	4.35439e-05
ANLN	FOXP4	-0.0351096
ANLN	IRF5	-0.0310584
ANLN	NUP98	0.207093
ANLN	PAX4	-0.000316344
ANLN	SCP2	0.139649
ANLN	SMAD2	0.11771
ANLN	SUPT4H1	-0.459023
ANLN	TCERG1	0.0513743
ANLN	TFE3	-0.0551911
ANLN	ZNF256	-0.000101677
ANLN	ZNF93	0.606049
ANO8	ATF6B	0.00131697
ANO8	ILF3	-0.291317
ANO8	OAZ1	0.0939952
ANO8	POU2F1	0.347721
ANO8	TAB1	-0.0152516
ANO8	TAF1B	-0.698454
ANO8	TAF9	0.755488
ANO8	TFCP2	0.451132
ANO8	TRIM25	0.0692338
ANO8	VAX2	0.0188372
ANO8	ZNF155	0.217579
ANO8	ZNF417	0.26798
ANO8	ZNF461	-0.0246318
ANO8	ZNF770	0.0194961
ANP32D	ETS1	0.0356396
ANP32D	GTF2H4	0.0853388
ANP32D	MKL1	0.176692
ANP32D	NR2C1	0.0266612
ANP32D	SRF	0.0825753
ANP32D	TAF5	0.199362
ANP32D	ZSCAN5B	-0.38003
AP1AR	BCL11A	-0.465077
AP1AR	BMI1	0.0418044
AP1AR	CDK9	-0.0123257
AP1AR	EGFR	-0.349872
AP1AR	HCFC1	0.0883131
AP1AR	HES1	0.0132693
AP1AR	MAF1	0.0517188
AP1AR	MED1	0.0171961
AP1AR	MYNN	0.289959
AP1AR	PITX1	-0.0447298
AP1AR	RUNX3	-0.0676318
AP1AR	ZNF169	-0.0726398
AP1AR	ZNF410	0.0125954
AP2A1	CDK9	-0.221045
AP2A1	CIC	0.382399
AP2A1	E2F4	0.0875098
AP2A1	MLX	0.338182
AP2A1	MYBL2	0.000424254
AP2A1	MYNN	0.421462
AP2A1	POU2F1	-0.00226934
AP2A1	POU5F1	-0.0669665
AP2A1	PRDM10	-0.283197
AP2A1	TBX18	0.0645727
AP2A1	TFAM	8.92501e-05
AP2A1	ZBTB18	0.00551707
AP2A1	ZBTB2	0.25539
AP2A1	ZNF417	-0.159724
AP2A1	ZSCAN12	0.146564
AP2B1	ABL1	0.313048
AP2B1	CREB3	0.63939
AP2B1	ETV4	0.0891355
AP2B1	IGHMBP2	0.12059
AP2B1	LITAF	0.186775
AP2B1	PDHX	0.574046
AP2B1	ZSCAN5B	-0.124831
AP5S1	ELK4	-0.0363373
AP5S1	POLR2G	0.182036
AP5S1	RBFOX2	0.0509333
AP5S1	RORB	0.116715
AP5S1	SETBP1	0.0351116
AP5S1	SMARCB1	0.306859
AP5S1	SREBF2	-0.0657202
AP5S1	SUPT4H1	0.0994409
AP5S1	ZNF71	0.285817
AP5S1	ZNF76	-0.00287776
APAF1	ELL	0.549537
APAF1	HINT1	-0.0361145
APAF1	NFKB2	0.949692
APAF1	SP4	2.52859
APAF1	SSB	1.4291
APAF1	TBX10	-0.0271922
APAF1	UBE2V1	0.464605
APAF1	ZFP64	0.0610016
APEH	ARNT	0.027253
APEH	CCNT2	0.172118
APEH	CDK9	-0.118162
APEH	CNBP	0.0488772
APEH	EGFR	-0.00733339
APEH	FOXK1	0.114004
APEH	FOXN3	3.45915e-05
APEH	HMGN1	0.453718
APEH	KAT7	1.09046e-05
APEH	LITAF	0.0173984
APEH	NFKB2	0.0201754
APEH	SCML1	0.160302
APEH	SETBP1	-0.0118724
APEH	ZBED1	0.353689
APH1A	AFF1	0.22232
APH1A	BARX2	0.217297
APH1A	CDC73	0.212407
APH1A	ETV3L	-1.36587
APH1A	IRX5	-0.133797
APH1A	MUC1	-0.111399
APH1A	MYNN	0.53886
APH1A	SCAND1	0.0901549
APH1A	SMARCA4	-0.00313971
APH1A	VDR	-2.308e-05
APH1A	ZBTB48	-0.0628919
API5	CCNT2	0.167551
API5	CTCF	0.138354
API5	E2F7	0.0726886
API5	FOXK2	-0.0767917
API5	GTF2IRD1	-0.00045068
API5	ISL1	0.0932498
API5	LHX2	-0.164674
API5	NFKB2	0.0453533
API5	NR2C1	0.00947073
API5	PAX4	-0.128631
API5	SMAD2	0.482283
API5	TAF2	0.000496692
API5	YAP1	0.00591365
API5	ZNF267	0.00263653
APMAP	ABL1	0.0996541
APMAP	CREB3	0.8699
APMAP	ELK4	0.157595
APMAP	FOXB1	-0.0171732
APMAP	LITAF	0.0299233
APMAP	MKL1	0.117415
APMAP	NEO1	0.0390954
APMAP	NR2C1	0.0314545
APMAP	SRF	0.0284164
APMAP	WT1	0.000426482
APMAP	ZSCAN5B	-0.221976
APOL2	BLZF1	0.334461
APOL2	DEAF1	0.198781
APOL2	FUBP1	0.046578
APOL2	HDAC8	-0.224516
APOL2	HMX1	0.0154665
APOL2	NEO1	-0.00107279
APOL2	PBX3	-0.271545
APOL2	SCML1	-0.0971676
APOL2	SMAD2	-0.160713
APOL2	TFE3	0.000201956
APOL2	TRIM25	0.136944
APOL4	CDK7	-0.0431236
APOL4	CTBP1	-0.263289
APOL4	DEAF1	0.0500449
APOL4	FOXC1	0.0119472
APOL4	HDAC8	-0.00118001
APOL4	HMGN3	-0.806473
APOL4	KLF17	0.0107127
APOL4	KLF2	-0.108968
APOL4	PRDM5	-0.617927
APOL4	TAF1B	-0.151646
APOL4	TRIM25	0.112399
APOL4	ZNF155	0.5973
APOL4	ZNF417	0.468221
APOL6	CERS3	0.0210413
APOL6	CTBP2	0.116777
APOL6	FOXC1	0.0952742
APOL6	HMGN3	-0.749254
APOL6	IRF7	0.125608
APOL6	MAPK8IP1	0.62102
APOL6	NR1I3	-0.0271974
APOL6	PTGER3	-0.345195
APOL6	SEBOX	-0.270066
APOL6	ZKSCAN5	0.375491
APOL6	ZNF419	0.699776
APOL6	ZNF652	1.07894
APPL1	ID1	-0.647113
APPL1	LRRFIP1	0.376594
APPL1	NACA	-0.236527
APPL1	PBX3	0.0501237
APPL1	PRDM5	0.0557138
APPL1	SKIL	0.200262
APPL1	SSB	0.339371
APPL1	TAF12	-0.217262
APPL1	ZNF267	0.114383
APPL1	ZNF45	0.161584
ARCN1	AATF	0.0800152
ARCN1	BMPR1A	-3.66021e-05
ARCN1	CERS2	0.32823
ARCN1	DLX6	-0.143559
ARCN1	LITAF	0.175031
ARCN1	LMO2	-0.00737719
ARCN1	LRRFIP1	0.177039
ARCN1	NFKB2	0.0764901
ARCN1	SS18L1	0.0708548
ARCN1	SSB	0.257566
ARCN1	ZFP64	0.356205
ARCN1	ZNF256	-0.388045
ARF1	ABL1	0.0926673
ARF1	CERS2	0.0173532
ARF1	CREB3	0.198495
ARF1	ENO1	0.157858
ARF1	HMGB1	0.050229
ARF1	NCOR1	0.304177
ARF1	SCML2	-1.66509e-05
ARF1	SUPT16H	0.278371
ARF1	ZNF160	-0.206548
ARF1	ZNF169	-0.146619
ARF1	ZNF90	-0.0145422
ARGLU1	CHD2	0.0568276
ARGLU1	EGR1	-0.333201
ARGLU1	EP300	0.137418
ARGLU1	IRX5	-0.052888
ARGLU1	JUND	0.18756
ARGLU1	KLF6	0.0439597
ARGLU1	MTF2	0.0966855
ARGLU1	NCOR1	0.0320151
ARGLU1	PBX4	-0.0430972
ARGLU1	STAT3	0.36002
ARGLU1	STOX1	-0.143274
ARGLU1	ZNF219	-0.218433
ARGLU1	ZNF394	-0.180606
ARGLU1	ZNF628	-0.0814148
ARHGAP35	CEBPZ	-0.0050836
ARHGAP35	DMBX1	0.00394941
ARHGAP35	E2F5	0.648176
ARHGAP35	FOXB1	-0.0169842
ARHGAP35	FOXO4	0.050623
ARHGAP35	HIF3A	-0.000254903
ARHGAP35	PHF1	0.0916967
ARHGAP35	RNF10	0.0189336
ARHGAP35	SREBF2	0.0397227
ARHGAP35	ZFP64	0.450412
ARHGAP35	ZNF513	0.459421
ARHGEF1	AATF	0.238259
ARHGEF1	ARNT	0.00621621
ARHGEF1	GATAD2A	0.0847248
ARHGEF1	HMGA1	0.171608
ARHGEF1	IRF2BP1	0.270899
ARHGEF1	KLLN	-0.0838196
ARHGEF1	LITAF	0.0865345
ARHGEF1	MESP2	-0.154693
ARHGEF1	SIM2	0.0291369
ARHGEF1	ZNF513	0.282746
ARHGEF2	ARID4A	0.0879126
ARHGEF2	BARX2	0.0710018
ARHGEF2	BCLAF1	-0.108071
ARHGEF2	EHF	0.0703754
ARHGEF2	FOXC1	-0.143146
ARHGEF2	GTF2F1	0.107095
ARHGEF2	LMX1B	-0.0255851
ARHGEF2	MAZ	0.232314
ARHGEF2	MYPOP	0.0218546
ARHGEF2	NCOR1	0.000531042
ARHGEF2	POLR2G	-0.126717
ARHGEF2	ZSCAN12	0.516398
ARHGEF28	FOXJ2	0.0107356
ARHGEF28	LHX1	-0.0234966
ARHGEF28	PCBP1	0.324476
ARHGEF28	PDHX	0.616803
ARHGEF28	SCML1	0.0407803
ARHGEF28	SLC30A9	0.0811606
ARHGEF28	SMARCB1	-0.0765215
ARHGEF28	SUPT4H1	-0.0632047
ARHGEF28	ZSCAN5B	-0.0790171
ARID1A	ARNT	0.153657
ARID1A	BAZ1B	0.426481
ARID1A	BAZ2A	0.0221505
ARID1A	CERS2	0.0191591
ARID1A	E2F7	0.205348
ARID1A	E2F8	-0.240861
ARID1A	ELL	1.05428
ARID1A	LCOR	0.105935
ARID1A	LHX2	-0.381458
ARID1A	NFKB2	0.00937286
ARID1A	SSB	0.0439541
ARID1A	TRIM28	0.00389551
ARID4B	AFF1	0.301529
ARID4B	ARID4A	0.153013
ARID4B	BACH1	0.0773589
ARID4B	EN2	-0.164758
ARID4B	HAND2	-0.00921199
ARID4B	KLF17	-0.0482178
ARID4B	LHX1	-0.116794
ARID4B	RB1CC1	0.0546348
ARID4B	SP8	-0.0154035
ARID4B	YY1	0.144895
ARID4B	ZNF394	-0.320362
ARID4B	ZNF711	0.179922
ARIH1	ADNP	0.00200501
ARIH1	AHR	0.035626
ARIH1	ARID4A	0.00521157
ARIH1	CHD2	0.00897639
ARIH1	CNBP	0.182389
ARIH1	DEAF1	-0.0303029
ARIH1	FOXN3	0.0766508
ARIH1	HMG20B	-0.205792
ARIH1	POLR2A	-0.0288337
ARIH1	PRDM5	0.00211426
ARIH1	TFE3	-0.569861
ARIH1	ZNF711	0.121866
ARL6IP1	ADNP2	0.0231509
ARL6IP1	ARID4A	0.0452381
ARL6IP1	CHD2	0.149089
ARL6IP1	EGR1	-0.0388137
ARL6IP1	HDAC8	0.00314064
ARL6IP1	HMGB1	0.383689
ARL6IP1	MAFG	-0.165942
ARL6IP1	RFXAP	2.05812
ARL6IP1	SOX9	0.0540569
ARL6IP1	ZHX1	0.356356
ARPC1B	ABL1	0.11228
ARPC1B	BLZF1	-0.0354415
ARPC1B	CERS2	0.0791506
ARPC1B	ENO1	0.189365
ARPC1B	ETV4	0.074221
ARPC1B	RORB	-0.0374858
ARPC1B	SMARCB1	-0.025756
ARSJ	BLZF1	0.319084
ARSJ	GATAD2A	-0.0648135
ARSJ	LITAF	-0.073593
ARSJ	RNF10	-0.115805
ARSJ	YY2	0.0238715
ARSJ	ZNF410	-0.568058
ARSK	ADNP2	0.308558
ARSK	ARID4A	0.151673
ARSK	ATF2	0.162149
ARSK	CREBZF	0.00526056
ARSK	EHF	0.0644402
ARSK	HOXA9	-0.0352603
ARSK	JUND	0.0611898
ARSK	MTF2	0.628556
ARSK	TEAD2	0.115857
ARSK	ZFPM2	-0.211055
ARSK	ZHX1	0.0411179
ARSK	ZSCAN1	-0.00946231
ARVCF	DEAF1	0.134008
ARVCF	HDAC2	-0.109877
ARVCF	HDGF	0.288856
ARVCF	KLF17	0.021104
ARVCF	LMX1B	0.122142
ARVCF	NFE2L2	0.0113158
ARVCF	NR4A1	0.44624
ARVCF	POLR2A	0.64872
ARVCF	SETBP1	0.0370545
ARVCF	ZNF155	0.440196
ARVCF	ZNF417	0.0476884
ARVCF	ZNF90	0.103102
ASAP1	BRD8	-0.00939772
ASAP1	CBFA2T2	-0.0109697
ASAP1	GATA4	-0.228653
ASAP1	HOXA3	-0.87378
ASAP1	SRF	0.0553545
ASAP1	TFAM	0.331097
ASAP1	ZFHX3	-0.453114
ASAP1	ZNF33B	-0.024511
ASB10	CDCA7L	-0.302236
ASB10	CDK7	-0.331468
ASB10	HAND2	0.0509585
ASB10	ITGB3BP	-0.284902
ASB10	KLF17	0.522664
ASB10	NHLH2	0.481126
ASB10	UBP1	0.136114
ASB10	YY1	-0.00126269
ASB10	ZC3H8	0.000168734
ASB10	ZNF155	0.0128204
ASB10	ZNF157	0.0146623
ASB10	ZNF92	0.211001
ASTN2	CDK7	-0.0820752
ASTN2	EMX1	0.122168
ASTN2	HDAC2	-0.00144616
ASTN2	KAT5	-0.0041048
ASTN2	KLF17	0.079401
ASTN2	NEUROG3	0.528132
ASTN2	NR4A1	0.183342
ASTN2	POLR2G	0.198298
ASTN2	ZNF45	-0.324521
ASTN2	ZNF461	-0.0756793
ASTN2	ZNF83	-0.105825
ATG16L1	E2F4	0.303366
ATG16L1	ETV3L	-0.368631
ATG16L1	GATAD2A	0.0120657
ATG16L1	HMGB2	-0.487678
ATG16L1	MAFK	0.102557
ATG16L1	MESP2	-0.198292
ATG16L1	MITF	-0.175709
ATG16L1	MLX	0.183228
ATG16L1	PRDM5	0.00498188
ATG16L1	SP2	0.0255454
ATG16L1	TIA1	-0.0452778
ATG16L1	ZBTB18	0.0293877
ATG16L1	ZBTB2	0.117689
ATG9A	ETV3L	-0.12826
ATG9A	ETV4	0.0204532
ATG9A	IGHMBP2	0.0968953
ATG9A	KLLN	-0.0304238
ATG9A	LITAF	0.0702524
ATG9A	NACA	-0.0353915
ATG9A	PDHX	0.0837487
ATG9A	SCMH1	0.61659
ATG9A	SKI	0.184093
ATG9A	SS18L1	0.447334
ATG9A	ZNF263	0.000160697
ATG9A	ZNF3	0.0205945
ATP10A	CDCA7L	-0.37072
ATP10A	GFI1B	-0.0289237
ATP10A	HMX2	0.0264982
ATP10A	MBD1	0.0982917
ATP10A	PAX9	0.0362919
ATP10A	PGBD1	0.117937
ATP10A	PITX3	0.00014955
ATP10A	PLAC8	0.248561
ATP10A	POLR2A	0.563302
ATP10A	SALL3	0.0262494
ATP10A	SP140	0.442809
ATP10A	TBX3	0.0172182
ATP10A	TP53	-0.0121054
ATP10A	ZBTB7B	0.00196617
ATP10A	ZRANB2	-0.00126901
ATP11B	CERS6	0.683514
ATP11B	DMBX1	0.0737329
ATP11B	FOXJ2	0.0452973
ATP11B	GTF2H3	-0.0764335
ATP11B	HOXA10	-0.0978088
ATP11B	POU3F2	-1.24429e-05
ATP11B	SMC3	0.731093
ATP11B	TLX3	-0.043483
ATP11B	ZBTB25	0.000541416
ATP11B	ZNF3	0.0251326
ATP11B	ZNF91	-0.0272608
ATP2C1	CREBZF	0.0298935
ATP2C1	GTF2H4	0.271221
ATP2C1	HNF1A	-0.0929849
ATP2C1	MTA1	2.08007e-05
ATP2C1	NKX2-3	-0.1024
ATP2C1	RFXAP	0.524689
ATP2C1	SCP2	0.132994
ATP2C1	SMAD2	0.220748
ATP2C1	SOX9	0.358167
ATP2C1	TSN	0.00171668
ATP2C1	ZFPM2	-0.197326
ATP6V1B2	CTCF	0.111277
ATP6V1B2	LHX2	-0.219598
ATP6V1B2	LMO2	-0.0528972
ATP6V1B2	NFKB2	0.00125662
ATP6V1B2	OTX1	0.0976846
ATP6V1B2	RSL1D1	0.0813822
ATP6V1B2	SKI	0.347828
ATP6V1B2	SS18L1	0.0575205
ATP6V1B2	TSN	0.30386
ATP6V1B2	ZNF267	0.0302508
ATP6V1B2	ZNF3	0.0386334
ATP6V1B2	ZNF410	0.498447
ATPAF1	BTAF1	0.182346
ATPAF1	CCNT2	0.104981
ATPAF1	NACA	-1.20107
ATPAF1	RSL1D1	0.0499139
ATPAF1	SKI	0.514878
ATPAF1	SKIL	0.0642623
ATPAF1	TAF12	-0.10833
ATPAF1	YAP1	0.716738
ATPAF1	ZNF282	0.0423595
ATXN7L3B	BAZ2A	0.455947
ATXN7L3B	CHD2	0.01098
ATXN7L3B	EGFR	-0.0364345
ATXN7L3B	GTF2H4	0.201075
ATXN7L3B	PDIA3	0.0260289
ATXN7L3B	PHTF1	-0.000798042
ATXN7L3B	PKNOX1	-0.0343513
ATXN7L3B	SIM2	0.00124765
ATXN7L3B	SOX9	0.00466981
ATXN7L3B	ZKSCAN2	-0.00039238
ATXN7L3B	ZNF169	-0.00535926
ATXN7L3B	ZNF639	-0.0821033
ATXN7L3B	ZNF668	-0.233554
ATXN7L3B	ZSCAN20	-0.0152762
AUP1	BLZF1	-0.190377
AUP1	ENO1	0.116997
AUP1	ETV4	0.244007
AUP1	GATAD2A	0.0723695
AUP1	POU2F1	-0.133831
AUP1	RORB	-0.0456515
AUP1	ZNF350	-8.2515e-05
AUP1	ZNF513	0.0365474
AURKB	AFF1	0.117329
AURKB	HNRNPA2B1	0.196741
AURKB	LHX1	-0.178686
AURKB	PCBP1	0.406686
AURKB	PHC1	-0.160571
AURKB	SUPT20H	0.143701
AURKB	ZNF746	-0.0137764
AURKB	ZSCAN5B	-0.0630273
AXIN1	CERS6	0.00174875
AXIN1	ETV3L	-0.0799938
AXIN1	ETV4	0.0443717
AXIN1	FOXB1	-0.000507455
AXIN1	GMEB2	0.167639
AXIN1	IGHMBP2	0.058798
AXIN1	KLF4	0.0251531
AXIN1	LITAF	0.277377
AXIN1	LRRFIP1	0.125118
AXIN1	MESP2	-0.152761
AXIN1	MITF	-0.0487181
AXIN1	NACA	-0.517442
AXIN1	NPAS2	0.0248856
AXIN1	NUP133	-0.000148414
AXIN1	SP2	0.152993
AXIN1	SSB	0.00138799
AXIN1	ZNF263	0.0554086
B3GALT5-AS1	CDK7	-0.624107
B3GALT5-AS1	CDK9	0.162623
B3GALT5-AS1	ILF3	-0.474634
B3GALT5-AS1	KAT5	-0.0464809
B3GALT5-AS1	POLR2G	0.268523
B3GALT5-AS1	TAF9	0.0976983
B3GALT5-AS1	ZNF143	0.0396727
B3GALT5-AS1	ZNF155	0.458447
B3GALT5-AS1	ZNF367	0.0356066
B3GALT5-AS1	ZNF90	0.00873411
B4GALT1	DDX17	0.472673
B4GALT1	DMBX1	0.264098
B4GALT1	ERCC3	0.0849709
B4GALT1	HINFP	0.134827
B4GALT1	ID1	-0.199116
B4GALT1	NCL	0.187522
B4GALT1	NOTO	-0.223722
B4GALT1	POU3F2	-0.0532506
B4GALT1	SSB	0.557432
B4GALT1	TCEAL1	0.0697371
B4GALT1	TPRX1	-0.468975
B4GALT1	ZBTB25	0.026161
B4GALT1	ZHX3	0.0206756
B4GALT1	ZNF91	-0.129151
B4GALT5	ABL1	0.0538444
B4GALT5	CHD2	0.00595747
B4GALT5	ELK4	0.149802
B4GALT5	FOXN3	0.278176
B4GALT5	HMGB1	0.221872
B4GALT5	HOXB3	0.0512891
B4GALT5	KLF4	0.00370994
B4GALT5	LMO7	0.132319
B4GALT5	MED1	0.136987
B4GALT5	MLLT10	0.0447348
B4GALT5	PAX4	-0.0225243
B4GALT5	PRDM5	0.00944033
B4GALT5	SMARCB1	-0.00373677
B4GALT5	TFE3	-0.0149742
B4GALT5	TLX3	-0.197361
B4GALT5	ZNF711	0.0091485
B4GALT5	ZSCAN5B	-0.0541779
BAG3	CSRNP1	0.0504443
BAG3	ETV4	0.000745039
BAG3	HMGB2	-0.103751
BAG3	IGHMBP2	0.00320088
BAG3	OTX1	0.24128
BAG3	RSL1D1	0.445985
BAG3	SKI	0.821225
BAG3	THAP11	0.0248744
BAG3	UBTF	0.156946
BAG3	ZNF213	0.00520782
BAG3	ZNF292	-0.144328
BAG3	ZSCAN2	0.230984
BAP1	FOXB1	-0.00923869
BAP1	GMEB2	0.640188
BAP1	NFKB2	0.0548898
BAP1	NPHS2	-0.159911
BAP1	NR2C1	0.0107875
BAP1	SS18L1	0.457864
BAP1	ZNF263	0.163606
BCL10	CDX1	0.0824376
BCL10	CTBP1	-0.0100363
BCL10	FUBP1	0.0944257
BCL10	HDAC2	-0.309834
BCL10	HIF3A	0.91815
BCL10	LIN9	-0.00267041
BCL10	NFE2L2	0.265892
BCL10	NR4A1	0.338493
BCL10	SP2	-0.0109865
BCL10	ZBTB16	0.0680826
BCL10	ZNF143	0.00630406
BCL10	ZNF155	0.213915
BCL2L1	ETS1	0.0678927
BCL2L1	HDAC8	0.15701
BCL2L1	HES1	0.0558746
BCL2L1	PAXBP1	0.0111154
BCL2L1	RHOXF1	-0.0900802
BCL2L1	ST18	-0.0280386
BCL2L1	ZFHX2	-0.297739
BCL2L1	ZKSCAN5	-0.126802
BCL2L1	ZNF267	0.143546
BCL2L1	ZSCAN5B	-0.629875
BCL7B	CDK7	-0.118004
BCL7B	CHD7	0.122474
BCL7B	ESRRA	0.461795
BCL7B	HLTF	-0.026173
BCL7B	HMGN3	-0.0423177
BCL7B	HNF1B	-0.0750974
BCL7B	ID3	-0.310869
BCL7B	KAT5	-0.32636
BCL7B	MBD1	0.0957479
BCL7B	TLX3	0.0681674
BCL7B	ZIC2	0.64257
BCL7B	ZNF384	-0.105072
BCL9	ABL1	0.0330218
BCL9	BAZ2A	0.318418
BCL9	CHD2	0.0186882
BCL9	ELK4	0.0386045
BCL9	FOXN3	0.239739
BCL9	GMEB2	0.000113823
BCL9	HMGB1	0.104682
BCL9	HOXB3	0.00113167
BCL9	KLF4	0.0114984
BCL9	MKL1	0.128706
BCL9	RXRG	-0.0175105
BCL9	SMAD4	0.0827762
BCL9	STIL	6.32401e-05
BCL9	ZNF76	0.0379559
BCL9	ZSCAN5B	-0.000432246
BCL9L	ABL1	0.0926487
BCL9L	CDC73	0.00825348
BCL9L	CERS2	0.000478814
BCL9L	E2F7	0.0225275
BCL9L	FOXK1	0.00506419
BCL9L	GATAD2A	0.0371941
BCL9L	HCFC1	0.066287
BCL9L	HES1	0.216868
BCL9L	HMGB1	0.0231111
BCL9L	MED1	0.00351448
BCL9L	MN1	1.70619e-05
BCL9L	PRDM5	1.68758e-05
BCL9L	SMARCC1	2.39053e-05
BCL9L	SRF	2.4171e-05
BCL9L	SUPT16H	0.231139
BCL9L	TAF11	0.0696294
BCL9L	TAF2	0.0612652
BCL9L	ZNF410	0.0135756
BECN1	EP300	0.210102
BECN1	GMEB2	0.000634849
BECN1	HMGA1	1.11144e-06
BECN1	ISL1	0.000441383
BECN1	MZF1	-0.145386
BECN1	NACA	-0.365388
BECN1	PARP1	0.0233088
BECN1	PHTF1	-0.0568432
BECN1	TAF2	0.0424079
BECN1	TFAP2A	-0.000516349
BECN1	THAP11	0.22062
BECN1	UBTF	0.237989
BECN1	ZGLP1	-0.137843
BECN1	ZNF267	0.144724
BMP8B	CBX3	-0.24351
BMP8B	CDK9	0.109974
BMP8B	DEAF1	0.00262613
BMP8B	EN2	0.0723708
BMP8B	ILF3	-0.392389
BMP8B	KLF17	0.54731
BMP8B	LDB1	-0.036283
BMP8B	NFE2L2	0.00918138
BMP8B	NR4A1	0.019616
BMP8B	SP140	0.000134045
BMP8B	TRIM25	0.145858
BMP8B	ZNF384	-0.0410459
BMP8B	ZNF417	0.0141902
BMS1P6	DAXX	-0.140318
BMS1P6	HMX1	0.407742
BMS1P6	NFE2L1	-0.642761
BMS1P6	NHLH2	0.000573081
BMS1P6	NONO	-0.107794
BMS1P6	NR4A1	0.0200292
BMS1P6	OAZ1	0.25679
BMS1P6	RFXAP	-0.00111206
BMS1P6	RORB	0.00804116
BMS1P6	SMC3	-0.440755
BMS1P6	TFE3	0.125777
BMS1P6	ZSCAN9	-4.55859e-05
BPNT1	CDX1	0.522462
BPNT1	DMBX1	-0.197708
BPNT1	ETV7	0.0511918
BPNT1	HDAC2	-1.18119
BPNT1	HMGN3	-0.570356
BPNT1	NFE2L2	0.0470375
BPNT1	PBX3	-0.0679014
BPNT1	TRIM25	0.093852
BRMS1L	CNBP	0.114703
BRMS1L	HMGN1	0.342811
BRMS1L	NUP98	0.113087
BRMS1L	PDHX	0.101855
BRMS1L	SMC3	0.698398
BRMS1L	ZFP64	0.0435888
BSG	BMI1	0.0927538
BSG	EGFR	-0.00131123
BSG	GTF2H4	0.698701
BSG	HES1	1.60939e-05
BSG	HIVEP2	-0.306739
BSG	HNRNPD	0.361971
BSG	IGHMBP2	0.0290819
BSG	MESP2	-0.0626433
BSG	PARP1	0.00534259
BSG	SMAD6	-0.0467355
BSG	ZNF169	-0.231592
BSG	ZNF513	0.00325066
BST2	IRF7	0.005129
BST2	IRF9	0.571673
BST2	MLXIPL	0.0192242
BST2	PLSCR1	0.0412209
BST2	STAT1	0.262933
BST2	TRIM22	0.196468
BTBD10	DLX6	-0.313272
BTBD10	E2F5	0.154118
BTBD10	IRF8	-0.487432
BTBD10	LMO2	-0.0141429
BTBD10	MGA	-0.0548838
BTBD10	NR2C1	0.189266
BTBD10	SCML2	-0.04233
BTBD10	SNIP1	0.00160984
BTBD10	ZFHX4	-0.235552
BTBD10	ZHX1	0.310622
BTBD10	ZNF256	-0.231304
BTG1	FOXJ2	0.0699144
BTG1	HES6	-0.148677
BTG1	HMG20A	0.0408117
BTG1	KAT7	0.229965
BTG1	LHX1	-0.0123785
BTG1	SNAPC5	-0.0916216
BTG1	TAF13	-0.03159
BTG1	XBP1	0.383908
BTG1	ZNF174	-0.314057
BTG1	ZNF703	-0.182946
BTG1	ZNF711	0.0527888
BTN2A1	CDK7	-0.0408494
BTN2A1	CTBP1	-0.181507
BTN2A1	DMBX1	-0.156428
BTN2A1	HDAC2	-0.0187072
BTN2A1	HDGF	0.0135682
BTN2A1	HMX1	0.220462
BTN2A1	NEUROG3	0.0646346
BTN2A1	NR4A1	0.210958
BTN2A1	SP140	0.0658671
BTN2A1	TFEB	0.0144818
BTN2A1	TRIM25	0.134425
BTN2A1	ZNF155	0.0932069
BTN2A1	ZNF367	0.0443431
C14orf1	AATF	0.249912
C14orf1	ADNP2	0.0172768
C14orf1	AFF1	0.00667546
C14orf1	CIC	0.000158942
C14orf1	GTF2H4	0.0329525
C14orf1	MAZ	0.0357036
C14orf1	RUNX3	-0.16466
C14orf1	SCAND1	0.0144298
C14orf1	TSC22D1	-0.166924
C14orf1	TTF2	-0.0757457
C14orf1	ZNF169	-0.516015
C14orf1	ZNF417	-0.530133
C16orf87	ADNP	0.00480293
C16orf87	CHD2	0.013363
C16orf87	DEAF1	-0.469597
C16orf87	ELF3	0.201516
C16orf87	HDGF	-0.0208026
C16orf87	RXRB	0.0178196
C16orf87	TCF19	-0.109898
C16orf87	TLX3	-0.120435
C16orf87	ZNF143	-0.0710581
C17orf67	EN2	0.380922
C17orf67	IRF8	0.369218
C17orf67	NONO	-0.358145
C17orf67	PAX9	0.0292709
C17orf67	PLAC8	0.347565
C17orf67	RELA	-0.00776057
C17orf67	SCML2	0.0260035
C17orf67	SP140	0.145468
C17orf67	ZFHX4	0.00216949
C17orf67	ZNF384	-0.0951206
C17orf67	ZSCAN9	-0.0860253
C18orf12	AFF4	-0.0647899
C18orf12	CDX1	0.16867
C18orf12	CEBPD	0.208346
C18orf12	CERS6	-0.00010682
C18orf12	FOXB1	0.40958
C18orf12	HIF3A	0.282829
C18orf12	HOXA10	1.98772e-05
C18orf12	LMX1B	0.0385693
C18orf12	NKRF	-0.0170447
C1orf115	CEBPZ	-0.732645
C1orf115	HDGF	-0.191473
C1orf115	MTA1	0.279297
C1orf115	NHLH2	-0.0523571
C1orf115	SOX9	0.127866
C1orf115	TEAD2	0.266791
C1orf115	WT1	0.568405
C1orf115	ZBTB20	0.034216
C20orf144	DRAP1	0.0958935
C20orf144	GTF2A2	0.0207911
C20orf144	HLTF	-0.0078482
C20orf144	HOXB8	-0.073005
C20orf144	KLF16	0.0350834
C20orf144	NKX2-3	0.287462
C20orf144	PAX9	0.0714648
C20orf144	POU2F2	0.00173946
C20orf144	PPARA	-0.0366737
C20orf144	RSF1	-0.061748
C20orf144	TOX3	-0.248535
C20orf144	TXK	-0.00107385
C20orf144	YEATS4	-0.333568
C20orf144	ZSCAN5A	0.221128
C5orf22	DLX6	-0.26269
C5orf22	FOXK2	-0.0550495
C5orf22	ISL1	0.0477158
C5orf22	MGA	-0.0125871
C5orf22	RFXAP	0.79832
C5orf22	SCYL1	-0.206631
C5orf22	SNIP1	0.0358098
C5orf22	SOX9	0.00791582
C5orf22	TBP	-0.452528
C5orf22	ZBTB14	-0.000494666
C5orf58	HMX1	0.382775
C5orf58	LHX1	0.242959
C5orf58	NEUROG3	0.473001
C5orf58	NFE2L1	-0.456427
C5orf58	SREBF2	-0.125477
C6orf223	ELK4	0.769764
C6orf223	GTF3A	-0.052777
C6orf223	HOXC10	0.449151
C6orf223	IRF1	0.00977186
C6orf223	LMX1B	-0.0506255
C6orf223	POLR2G	-0.0984144
C6orf223	SHOX2	0.308049
C6orf25	HOXA9	0.239017
C6orf25	HOXC10	-0.207187
C6orf25	IRF1	-0.436401
C6orf25	IRF2	-0.104001
C6orf25	MTF2	-0.094817
C6orf25	SOX9	-0.166842
C6orf25	SP8	0.0234038
C6orf25	TXK	-0.0188455
C6orf25	ZNF174	0.689258
C6orf25	ZNF668	0.098088
C8orf31	BATF2	0.124609
C8orf31	BLZF1	0.0963472
C8orf31	CDK9	0.32803
C8orf31	CTNNB1	0.0110465
C8orf31	GATAD2B	0.103431
C8orf31	HOXA1	0.0303263
C8orf31	HOXC8	0.648588
C8orf31	LMO2	0.116685
C8orf31	REST	-0.107833
C8orf31	RHOXF1	0.134548
C8orf31	ZNF41	-0.0486863
CAB39	HOXC6	-0.205329
CAB39	IER3	0.00777259
CAB39	KLLN	-0.0654991
CAB39	LRRFIP1	0.0107641
CAB39	MESP2	-0.226666
CAB39	RSL1D1	0.301022
CAB39	SKI	0.220584
CAB39	SKIL	0.0393433
CAB39	SOX8	-0.0659652
CAB39	SRF	0.0606146
CAB39	YAP1	0.159359
CAB39	ZFPM1	-0.0997678
CAB39	ZNF165	-0.20425
CAB39	ZNF18	-0.000366955
CABP7	BCL6	-0.0646529
CABP7	ERBB3	-0.0809169
CABP7	FOXL1	0.0789299
CABP7	HNF1B	-0.712261
CABP7	NKX3-2	-0.0311051
CABP7	PGBD1	0.597094
CABP7	PRRX1	0.157352
CABP7	TP53	-0.0325592
CACNA1C	ELL	-0.0623201
CACNA1C	FOXN3	-0.148328
CACNA1C	HMGN1	-0.294748
CACNA1C	HMX1	0.00118333
CACNA1C	PHC1	0.0828288
CACNA1C	RORB	0.00368912
CACNA1C	SUPT4H1	0.227192
CACNA1C	TCF7L2	0.0606626
CACNA1C	TFE3	0.512705
CACNA1C	TP53	-0.0595568
CALU	AR	0.349562
CALU	BUD31	0.0109377
CALU	EGR1	-0.185322
CALU	KLF6	0.14925
CALU	MAZ	0.0398366
CALU	MTA1	0.0792432
CALU	NUP133	-0.551244
CALU	SIX1	0.252209
CALU	SP5	-0.0162715
CALU	TTF2	-0.0101272
CALU	ZFAT	-0.678138
CALU	ZHX1	0.166129
CALU	ZNF219	-0.054167
CALU	ZNF281	0.0292237
CALU	ZSCAN5B	-0.00660736
CAMK2N1	CTCF	0.0240246
CAMK2N1	DLX6	-0.131655
CAMK2N1	IRX5	-0.137632
CAMK2N1	KLLN	-0.0391458
CAMK2N1	NRL	-0.00636441
CAMK2N1	OTX1	0.05368
CAMK2N1	PARP1	0.116691
CAMK2N1	RSL1D1	0.161442
CAMK2N1	SKI	0.0770555
CAMK2N1	SRF	0.0189014
CAMK2N1	TAF5	0.191712
CAMK2N1	ZNF267	0.458555
CANT1	E2F7	0.0705956
CANT1	EP300	0.11502
CANT1	ETV4	0.0437977
CANT1	GMEB2	0.543805
CANT1	HMGB2	-7.87861e-05
CANT1	ID1	-0.302917
CANT1	MAF	-0.0703742
CANT1	MKL1	0.219241
CANT1	NACA	-0.605419
CANT1	NFKB2	0.0775859
CANT1	SIM2	0.000165818
CANT1	SSB	0.00535056
CANT1	SUPT16H	0.0446605
CANT1	TAF2	0.0583446
CANT1	THAP11	0.18293
CANT1	UBTF	6.09024e-05
CANT1	YY2	-0.0719287
CANT1	ZNF3	0.00310287
CAP1	CERS6	0.0601016
CAP1	CREB3	0.471542
CAP1	FOXB1	-0.124348
CAP1	LITAF	0.170406
CAP1	MKL1	0.589852
CAP1	NOTCH1	-0.0044749
CAP1	OTX1	0.00161095
CAP1	SKI	0.322152
CAP1	ZNF267	0.980459
CAPN1	CIC	0.00564474
CAPN1	CREB3	0.727915
CAPN1	FOXO4	0.212704
CAPN1	LITAF	0.0994432
CAPN1	MAF1	0.230264
CAPN1	MYNN	0.116685
CAPN1	PHF1	0.127153
CAPN1	ZNF169	-0.209746
CAPN1	ZNF213	0.0757347
CAPN1	ZNF513	0.141912
CAPN10	CDK7	-2.53008e-05
CAPN10	CNBP	-0.182289
CAPN10	NFE2L2	0.00407266
CAPN10	NONO	-0.230629
CAPN10	NR4A1	0.0442991
CAPN10	OAZ1	0.0367696
CAPN10	POLR2A	0.21194
CAPN10	RORB	0.100588
CAPN10	SHOX2	-0.0534404
CAPN10	SUPT20H	-0.0209473
CAPN10	TLX3	0.221272
CAPN10	ZNF143	0.164225
CAPN10	ZNF417	0.200177
CAPN10	ZNF90	0.0294277
CAPS	BCLAF1	-0.0326977
CAPS	CIC	0.15688
CAPS	GTF3A	-0.380638
CAPS	LMX1B	-0.154615
CAPS	MAF1	0.0213698
CAPS	MAZ	0.21626
CAPS	PHF1	0.00368715
CAPS	SREBF2	0.227491
CAPS	TBX18	0.388207
CAPZA2	BMPR1A	-0.0404754
CAPZA2	CERS2	0.233156
CAPZA2	HMGB1	0.117095
CAPZA2	KDM1A	0.148995
CAPZA2	PITX1	-0.506597
CAPZA2	PKNOX1	-0.0267281
CAPZA2	SCML2	-0.0547505
CAPZA2	SMAD4	0.08331
CAPZA2	TCERG1	0.0153751
CAPZA2	ZNF169	-0.289194
CAPZA2	ZNF76	0.206605
CARD16	AATF	-0.205962
CARD16	BATF2	0.142815
CARD16	CNOT7	-0.0959778
CARD16	CTBP1	-0.040427
CARD16	FUBP1	0.000316723
CARD16	STAT2	0.124738
CARD16	TFCP2	0.188413
CARD16	ZHX3	-0.131922
CARD16	ZNF350	0.0451552
CARD16	ZNF395	-0.0283887
CARD16	ZNF653	-0.281277
CASC3	ARNT	0.0409763
CASC3	BAZ2A	0.10072
CASC3	IRX5	-0.0639949
CASC3	KAT7	0.1143
CASC3	NONO	0.118133
CASC3	NUP98	0.294266
CASC3	TAF6	-0.5455
CASC3	ZNF256	-0.0806674
CASP8	ADNP2	3.39898e-05
CASP8	DMRTC1	-1.02759
CASP8	GTF2H4	0.33258
CASP8	ISL1	0.0427619
CASP8	KLF4	0.0523429
CASP8	MTA1	0.145181
CASP8	RFXAP	0.0534493
CASP8	SOX9	0.013602
CASP8	SP4	1.20579
CASP8	TEAD1	0.288581
CASP8	TP53	0.0142926
CASP8	ZBTB14	-0.899513
CASP8	ZNF500	0.29085
CAV2	EGR1	-0.0396612
CAV2	HNRNPAB	0.212765
CAV2	IRX3	-0.136499
CAV2	NR1H3	-0.202793
CAV2	NRL	-0.533671
CAV2	RFX1	-0.688677
CAV2	SKI	0.0542752
CAV2	SRF	0.0350529
CAV2	TFCP2L1	-0.0331736
CAV2	WRNIP1	0.017728
CAV2	ZFHX2	-0.121009
CAV3	BACH1	-0.692687
CAV3	CDX1	0.319357
CAV3	KLF17	0.242967
CAV3	LHX3	0.200815
CAV3	LIN9	-0.78502
CAV3	PRR13	-1.08362
CAV3	ZBTB16	0.968907
CAV3	ZNF155	0.148199
CAV3	ZNF83	-0.150248
CCDC117	ATF2	0.0317404
CCDC117	CREB1	0.134503
CCDC117	FBXW7	-0.411811
CCDC117	HNRNPD	0.844529
CCDC117	MTA1	0.324765
CCDC117	MUC1	-0.458846
CCDC47	AFF1	0.230601
CCDC47	CREB3	0.169363
CCDC47	FOXK1	0.0259036
CCDC47	GTF2H4	0.0907034
CCDC47	HMGB1	0.20954
CCDC47	MAF1	0.0557414
CCDC47	MED1	0.0926721
CCDC47	PITX1	-0.0146021
CCDC47	PLAC8	-0.0246671
CCDC47	SLC30A9	0.64707
CCDC47	TCERG1	3.07756e-05
CCDC47	TSN	0.0613936
CCDC47	ZHX1	0.00454344
CCDC68	PHF1	-0.243562
CCDC68	POU2F1	0.175412
CCDC68	TAB1	-0.105067
CCDC68	TAF9	0.244039
CCDC68	TRIM25	0.334365
CCDC68	ZC3H8	0.0372071
CCDC68	ZNF132	0.0761751
CCDC68	ZNF417	0.164919
CCDC68	ZNF770	0.0432348
CCDC68	ZNF90	0.407766
CCL24	ATF6B	0.0139968
CCL24	CEBPD	0.394183
CCL24	DMBX1	-0.105849
CCL24	ESR1	0.347175
CCL24	HIF3A	0.00684154
CCL24	NEO1	-0.215448
CCL24	NOTO	0.226983
CCL24	PRDM5	-7.90793e-05
CCL24	TAF1B	-0.0997416
CCL24	YY1	-0.528461
CCL24	ZBTB16	0.14684
CCL24	ZHX3	-0.000252486
CCL24	ZNF132	0.122146
CCL24	ZNF155	0.185797
CCL24	ZNF461	-0.378479
CCM2	BACH1	-0.0360593
CCM2	CDK7	-0.762889
CCM2	KLF17	0.0697687
CCM2	LIN9	-0.537567
CCM2	NFE2L2	0.049648
CCM2	TAF1	-0.494142
CCM2	TGIF2LY	-0.165218
CCM2	TRIM16	0.298031
CCM2	YY1	-0.242605
CCM2	ZNF155	0.53191
CCM2	ZNF83	-0.110314
CCND1	FOXO3	-0.102113
CCND1	HOXC6	-1.51707
CCND1	HOXC9	-0.246021
CCND1	IRX3	-0.000415896
CCND1	NR1H3	-0.0903429
CCND1	NRL	-0.716102
CCND1	RFX1	-0.0399317
CCND1	RHOXF1	-0.0851699
CCND1	SKI	0.6355
CCND1	ZBTB2	0.0111059
CCNG1	AFF1	0.273864
CCNG1	ELF1	0.183712
CCNG1	KLF5	0.111476
CCNG1	PITX1	-0.0716633
CCNG1	REXO4	-0.157708
CCNG1	ZNF174	-0.0551334
CCNG1	ZNF711	0.154972
CCNG2	ELF1	0.0624529
CCNG2	JUN	-0.238076
CCNG2	MTF1	-0.159178
CCNG2	NACC2	-0.00939188
CCNG2	SCP2	0.248643
CCNG2	SP8	-0.100037
CCNG2	STIL	0.159726
CCNG2	TCF12	0.0794202
CCNG2	TSHZ1	0.00285641
CCNG2	ZBTB33	0.0124327
CCNG2	ZGPAT	-0.0179928
CCNG2	ZKSCAN4	0.00143701
CCNG2	ZNF174	-0.135199
CCNG2	ZNF398	-0.453426
CCNG2	ZNF703	-0.195844
CCNG2	ZSCAN20	-0.0748278
CCNK	E2F5	0.322963
CCNK	E2F7	0.00879983
CCNK	ELL	0.177199
CCNK	HCFC1	0.0172791
CCNK	HMGN1	0.0823614
CCNK	LRRFIP1	0.0147742
CCNK	NUP98	0.0392706
CCNK	SNIP1	0.186408
CCNK	TAF2	0.180743
CCNK	TGIF2	0.0807298
CCNK	ZBED1	0.00154069
CCNK	ZFHX4	-0.024122
CCNK	ZIC1	-0.222039
CCNY	EGR1	-0.0155467
CCNY	ETS1	0.0630236
CCNY	HESX1	-0.416324
CCNY	KLF6	0.156284
CCNY	MTA1	0.0337001
CCNY	MTF2	0.120344
CCNY	SIX1	0.579097
CCNY	ZFAT	-0.576456
CCNY	ZFHX3	-0.657369
CCNY	ZNF281	0.224185
CD46	CDC73	0.488103
CD46	ELK4	0.0828171
CD46	HDAC8	0.731652
CD46	MAF1	0.00825139
CD46	NEO1	0.171994
CD46	PHC1	-0.257329
CD46	PLAGL1	0.0110835
CD46	SNIP1	0.0135697
CD46	SREBF2	0.101856
CD46	ZBTB18	0.285646
CD46	ZFHX4	-0.0405706
CD46	ZNF76	0.440946
CD46	ZSCAN12	3.4683e-05
CD74	HDAC8	0.0230552
CD74	HNRNPA2B1	0.755908
CD74	MYNN	0.351248
CD74	PHC1	-0.555672
CD74	PITX1	-0.0238623
CD74	POU2F1	-0.0368304
CD74	RFX1	-0.00278962
CD74	RUNX3	-0.00219739
CD74	SHOX2	0.137866
CD74	SLC30A9	0.0201799
CD74	ZNF71	-0.000198792
CD79A	HDGF	0.429317
CD79A	HMX1	0.0907693
CD79A	NHLH2	0.00119
CD79A	NKX2-3	0.323404
CD79A	PAX9	0.0832314
CD79A	PLAC8	0.120972
CD79A	POU2F2	0.081853
CD9	BMPR1A	-0.0298996
CD9	CNBP	4.59567e-05
CD9	CREB3	0.391996
CD9	GTF3A	-0.157815
CD9	HMGB1	0.152714
CD9	HOXB3	0.00631558
CD9	ID1	-0.572458
CD9	MAF1	0.0334428
CD9	NCOR1	0.17624
CD9	POLR2A	-0.0102708
CD9	SCAND1	0.115108
CD9	SCML2	-0.0657936
CD9	SLC30A9	0.199007
CD9	ZNF417	-0.000176322
CD9	ZNF90	-0.00377245
CD99	ENO1	0.216421
CD99	GATA3	-0.0518708
CD99	GATAD2A	0.00953191
CD99	HMGB1	0.0500755
CD99	NACA	-0.748442
CD99	PCBP1	0.313743
CD99	TCERG1	0.0150068
CD99	TSC22D1	-0.257144
CDC14B	BAZ2A	0.0601842
CDC14B	CTCF	0.269887
CDC14B	DLX6	-0.0371272
CDC14B	E2F7	0.287969
CDC14B	HMGA1	0.0148998
CDC14B	ID1	-0.151244
CDC14B	MKL1	0.221237
CDC14B	NFKB2	0.379805
CDC14B	PHTF1	-0.222139
CDC14B	SMAD2	0.0912458
CDC14B	TAF2	0.260175
CDC14B	ZGLP1	-0.12391
CDC14B	ZNF267	0.102006
CDC14B	ZNF3	0.122844
CDC37	CREB3	0.293045
CDC37	CUX1	0.390504
CDC37	E2F4	0.0664816
CDC37	FOXH1	-0.0440144
CDC37	FOXO3	-0.026813
CDC37	HCFC1	0.212493
CDC37	HDAC8	0.248482
CDC37	HES1	0.0345746
CDC37	HNRNPAB	0.0269882
CDC37	LMO2	-0.00143325
CDC37	MAFK	0.00142641
CDC37	RHOXF1	-0.0889459
CDC37	RUNX3	-0.0122922
CDC37	ST18	-0.0346482
CDC37	ZHX1	0.00286371
CDC42BPA	CERS6	0.503299
CDC42BPA	CLOCK	0.096504
CDC42BPA	FOXJ2	0.207019
CDC42BPA	HINFP	0.00323837
CDC42BPA	KAT7	0.0278514
CDC42BPA	NFATC3	0.0347279
CDC42BPA	SCMH1	0.297912
CDC42BPA	SMC3	0.321256
CDC42BPA	TAB1	0.0196347
CDC42BPA	ZFP64	0.488085
CDC42BPA	ZNF3	0.0299977
CDC42BPA	ZNF300	0.248748
CDC42BPA	ZNF45	0.0248075
CDIPT	ABL1	0.0823258
CDIPT	ENO1	0.0653424
CDIPT	FOXO4	0.0387919
CDIPT	GMEB2	0.000131513
CDIPT	HMGB1	0.257829
CDIPT	SMARCB1	-0.0432907
CDIPT	TCERG1	0.0308716
CDIPT	ZNF76	0.0967502
CDIPT	ZSCAN5B	-0.0218295
CDK2	HNRNPL	0.0217977
CDK2	MTA1	0.260985
CDK2	NFIA	0.0499809
CDK2	NOTO	-0.332042
CDK2	SOX9	0.313429
CDK2	TEAD1	0.690033
CDK2	TEAD2	0.30821
CDK2	ZNF500	0.294143
CDKAL1	BAZ2A	0.00674556
CDKAL1	CHD2	0.0125874
CDKAL1	EED	-0.477476
CDKAL1	GABPB1	-0.508392
CDKAL1	HINT1	-0.0799388
CDKAL1	HMGB1	0.000129345
CDKAL1	ID1	-0.0730154
CDKAL1	MYEF2	0.00123168
CDKAL1	RXRG	-0.12067
CDKAL1	SIM2	0.0676071
CDKAL1	TP53	0.0268605
CDKAL1	ZNF3	0.58866
CDR2	ADNP	0.324741
CDR2	BAZ2A	0.0120894
CDR2	CERS6	0.0928534
CDR2	NUP98	0.0536514
CDR2	PAX4	-0.122396
CDR2	SMC3	0.149782
CDR2	TLX3	-0.0512659
CDR2	ZNF3	0.273422
CDYL	CREB3	0.36968
CDYL	CTCF	0.255836
CDYL	GMEB2	0.174778
CDYL	SUPT16H	0.151484
CEACAM20	BACH1	-0.435598
CEACAM20	CEBPG	-0.018165
CEACAM20	FOXJ3	-0.656519
CEACAM20	FOXN1	0.371948
CEACAM20	KLF17	0.333388
CEACAM20	KLF2	-0.0800566
CEACAM20	LMX1B	0.0321737
CEACAM20	NFE2L2	0.299251
CEACAM20	TAF1B	-0.370091
CEACAM20	TFEB	0.195168
CEACAM20	ZNF157	0.0309648
CEBPZOS	CDK7	-0.875792
CEBPZOS	DEAF1	0.150517
CEBPZOS	HDAC8	-0.365209
CEBPZOS	HMGN3	-0.0626862
CEBPZOS	NFE2L2	0.0489748
CEBPZOS	NR4A1	0.407799
CEBPZOS	POLR2G	0.0405534
CEBPZOS	PRDM5	-0.358893
CEBPZOS	RORB	0.144326
CEBPZOS	TLX3	9.99423e-05
CEBPZOS	ZNF155	0.25832
CEBPZOS	ZNF417	0.302174
CEP85	ABL1	0.0418193
CEP85	CERS6	0.214244
CEP85	CREB3	0.31481
CEP85	ETV4	0.176752
CEP85	HCFC1	0.144447
CEP85	HMGB1	0.153974
CEP85	TAF2	0.0920532
CEP85	TGIF2	0.0180546
CERK	CSRNP1	0.203119
CERK	ESR1	-0.0144062
CERK	ETV5	0.2499
CERK	IRF9	-0.16817
CERK	NHLH1	0.00032461
CERK	ONECUT1	-0.0387687
CERK	PROP1	-0.0103575
CERK	SKI	0.000706641
CERK	SOX8	-0.0301522
CERK	TLE4	-0.0794433
CERK	ZNF263	0.157878
CERK	ZNF653	0.370413
CFL1	BCL11A	-0.516352
CFL1	BLZF1	-0.0255837
CFL1	E2F4	0.122671
CFL1	EGFR	-9.17398e-05
CFL1	ETS1	0.0674048
CFL1	GTF2IRD1	-4.99243e-05
CFL1	HDAC8	0.0533003
CFL1	HES1	0.00236392
CFL1	HMGB1	0.228908
CFL1	HNRNPAB	0.00629533
CFL1	MAF1	0.402729
CFL1	PRDM10	-0.000474891
CFL1	ZFAT	-0.0244634
CFL1	ZFHX4	-0.0343849
CFL1	ZHX1	0.21586
CFL1	ZNF410	0.00197192
CFL1	ZNF76	0.00126087
CHD1	ABL1	0.00221246
CHD1	CDC73	0.287069
CHD1	CREB3	0.0795603
CHD1	E2F4	0.0540289
CHD1	IRX3	-0.159091
CHD1	MYBL2	0.0818576
CHD1	PRDM10	-0.175713
CHD1	TFAM	0.0736978
CHD1	ZNF160	-0.224229
CHD4	AATF	0.153689
CHD4	ARNT	0.0102568
CHD4	CEBPZ	-0.0183211
CHD4	CERS2	0.180593
CHD4	CERS6	0.130263
CHD4	LITAF	0.160474
CHD4	SCMH1	0.372191
CHD4	SMARCC1	0.0027637
CHD4	SS18L1	0.445097
CHD4	ZFP64	0.301098
CHKB-AS1	CDK9	0.00314306
CHKB-AS1	CLOCK	-0.267593
CHKB-AS1	DAXX	-0.175209
CHKB-AS1	ETV7	0.0822716
CHKB-AS1	FUBP1	0.146749
CHKB-AS1	HDAC2	-0.593607
CHKB-AS1	KAT5	-0.287594
CHKB-AS1	LDB1	-1.34599e-05
CHKB-AS1	LZTR1	-0.0159152
CHKB-AS1	NFE2L2	0.109673
CHKB-AS1	NHLH2	0.00295602
CHKB-AS1	NR4A1	0.0785005
CHKB-AS1	POU2F3	-0.0445242
CHKB-AS1	SMC3	-0.0396187
CHPF2	BRCA1	-0.0870705
CHPF2	MAFK	0.590909
CHPF2	MLX	0.0721015
CHPF2	MYBL2	0.223135
CHPF2	POU2F1	-0.0635685
CHPF2	RHOXF1	-0.104465
CHPF2	SKIL	0.15492
CHST14	ETV4	0.11124
CHST14	FOXB1	-0.041494
CHST14	FOXH1	-0.00328755
CHST14	IGHMBP2	0.0495235
CHST14	KLF4	0.000804353
CHST14	NEO1	0.524034
CHST14	PDHX	0.00350795
CHST14	SCML1	0.1219
CHST14	SP2	0.0157206
CHST14	ZBED1	0.09134
CHST14	ZNF282	0.005601
CHST14	ZNF513	0.146936
CIITA	BLZF1	0.00303352
CIITA	DAXX	-0.057055
CIITA	EGFR	0.0610758
CIITA	HNF4G	-0.00157946
CIITA	NFE2L2	0.0280172
CIITA	NHLH2	0.143796
CIITA	NR4A1	0.00681252
CIITA	PLAC8	0.512064
CIITA	POLR2A	0.0571931
CIITA	RNF10	-0.177783
CIITA	TRIM25	0.179325
CIITA	ZNF134	0.0771148
CIRBP	BATF	-0.029363
CIRBP	CBFA2T2	-0.156503
CIRBP	CDKN1A	0.12512
CIRBP	NR5A2	-0.426342
CIRBP	RFX5	-0.141388
CIRBP	SIRT6	0.0033594
CIRBP	STAT2	-0.102694
CIRBP	STAT4	-0.0829231
CIRBP	ZNF18	-0.688133
CLDN7	CHD2	0.00829853
CLDN7	CREB3	0.0889583
CLDN7	FOXO4	0.220394
CLDN7	HOXB3	0.0219247
CLDN7	NCOR1	0.30435
CLDN7	PLAGL1	0.0016601
CLDN7	SIM2	0.430735
CLDN7	SMAD4	0.0707908
CLDN7	SMARCB1	-0.018328
CLDN7	ZSCAN5B	-0.217051
CLINT1	ARID4A	0.282152
CLINT1	ATF2	0.173861
CLINT1	MAFG	-0.0466674
CLINT1	MTA1	0.255508
CLINT1	MTF2	0.845855
CLINT1	MUC1	-0.238591
CLINT1	NFIA	0.0248818
CLINT1	PBX4	-0.0370065
CLINT1	SCAND1	0.111716
CLINT1	VDR	-0.391148
CLINT1	ZHX1	0.135879
CLK3	CDK7	-0.179322
CLK3	CERS6	-0.129164
CLK3	CTBP1	-0.0552411
CLK3	DEAF1	0.0351788
CLK3	EN2	0.0544329
CLK3	HDAC2	-0.293462
CLK3	HIF3A	0.138151
CLK3	HMX1	0.256821
CLK3	NEUROG3	0.152236
CLK3	NONO	-0.755769
CLK3	POLR2A	0.406527
CLK3	ZNF300	-0.000233661
CLN8	ELF3	-0.0366609
CLN8	FOXK2	0.0653845
CLN8	GTF2A2	0.000584916
CLN8	HINT1	0.201149
CLN8	JUN	3.6008e-05
CLN8	MTF2	-0.0230156
CLN8	RARB	-0.00578442
CLN8	SOX4	-0.0694248
CLN8	SRRT	1.06615
CLN8	TSHZ1	-0.00669605
CLN8	ZBTB20	-0.456857
CLN8	ZNF174	0.080254
CLN8	ZNF500	-0.0226425
CLN8	ZSCAN20	0.291642
CLPTM1	CBFA2T2	-0.00957645
CLPTM1	ETV4	0.0403912
CLPTM1	HDAC8	0.497913
CLPTM1	HNRNPAB	0.106407
CLPTM1	ID1	-0.038553
CLPTM1	MYNN	0.173384
CLPTM1	RFX1	-0.0826511
CLPTM1	SLC30A9	0.277531
CLPTM1	THAP11	0.687709
CLPTM1	ZNF267	0.111432
CLPTM1	ZNF513	0.0193095
CLUH	FOXB1	-0.00235403
CLUH	MAFK	0.115607
CLUH	NEO1	0.234295
CLUH	ZBED1	0.0415862
CLUH	ZBTB18	0.086417
CLUH	ZNF410	1.04607
CLUH	ZSCAN12	0.140557
CMPK2	ATF6B	0.115
CMPK2	BLZF1	0.006848
CMPK2	DMBX1	-0.0761496
CMPK2	ETV7	0.301446
CMPK2	FOXB1	0.0503288
CMPK2	IRF7	0.820611
CMPK2	TFCP2	0.0948264
CMPK2	TRIM25	0.393237
CMPK2	ZBTB16	0.428327
CMPK2	ZHX3	-0.175709
CMPK2	ZNF132	0.0974554
CMPK2	ZNF155	0.000149105
CMTM1	ELF3	-0.0836701
CMTM1	FOXO4	-0.0287159
CMTM1	HNF1B	-0.103352
CMTM1	LHX1	0.267825
CMTM1	NACC1	0.0758209
CMTM1	REXO4	0.232912
CMTM1	SETBP1	0.0905276
CMTM1	SNAPC5	0.196676
CMTM1	SUPT20H	-0.0633644
CMTM1	TOX3	-0.135482
CMTM1	ZSCAN5A	0.0286467
CNN2	CIC	0.274862
CNN2	E2F4	0.549571
CNN2	FOXO3	-0.0278841
CNN2	HMGB2	-0.0135897
CNN2	HOXC6	-0.6131
CNN2	MAFF	0.100523
CNN2	MAFK	0.200417
CNN2	MESP2	-0.000375238
CNN2	TIA1	-0.0496769
CNOT11	ADNP2	0.126461
CNOT11	FOXC1	-0.0852369
CNOT11	HDAC8	0.0494679
CNOT11	MAZ	0.196481
CNOT11	NCOR1	0.269352
CNOT11	NEO1	0.121951
CNOT11	SREBF2	0.0697623
CNTRL	ADNP2	0.0427317
CNTRL	IRF2	0.146783
CNTRL	NKX2-3	-0.0936383
CNTRL	REXO4	-0.225033
CNTRL	RFX4	0.0540864
CNTRL	SNAI3	0.501607
CNTRL	TBX3	-0.448181
CNTRL	TEAD1	0.0496469
CNTRL	TP53	0.347649
CNTRL	ZNF117	-0.311901
CNTRL	ZNF92	-0.0513853
CNTRL	ZSCAN5A	-0.127217
COLGALT1	CREB3	0.336109
COLGALT1	ETV3L	-0.0334092
COLGALT1	ETV4	0.0315482
COLGALT1	GMEB2	0.169032
COLGALT1	IGHMBP2	0.0306158
COLGALT1	MYNN	0.0884059
COLGALT1	NFATC3	0.0564993
COLGALT1	OTX1	0.139553
COLGALT1	PDHX	0.00345485
COLGALT1	PLAGL1	0.300958
COLGALT1	SCMH1	0.756152
COLGALT1	ZNF267	0.137087
COLGALT1	ZNF3	0.109952
COLGALT1	ZNF589	0.00582612
COMMD2	AHR	0.10342
COMMD2	CREB3	0.176765
COMMD2	HDAC8	0.0776531
COMMD2	IRF5	-0.0753385
COMMD2	MKL1	6.79694e-05
COMMD2	MYNN	0.0451629
COMMD2	NR2C1	0.285491
COMMD2	RFX1	-0.287519
COMMD2	SRF	0.0252777
COMMD2	STAT3	0.203513
COMMD2	TSN	0.519486
COMMD2	ZNF267	0.111245
COMMD2	ZNF394	-0.163449
COMMD2	ZSCAN5B	-0.230901
COMT	BHLHE40	0.0653794
COMT	BLZF1	-0.0507666
COMT	BMPR1A	-0.235779
COMT	BRF2	0.0184162
COMT	CERS2	0.0154839
COMT	GTF3A	-0.26494
COMT	MAFK	0.0325465
COMT	POU2F1	-0.102437
COMT	RNF10	0.0176224
COMT	RORB	-0.195427
[truncated: 15,135 more rows]

## Sheet: Table S5
Table S5. Prediction accuracy of lasso and lm (linear regression)
Gene symbols	Gene clusters	H1N1_lasso	H1N1_lm	H5N1_lasso	H5N1_lm	H7N9_lasso	H7N9_lm
CMPK2	cluster_8_1	0.975956	0.914866	0.725081	0.751633	0.968708	0.350186
DDX58	cluster_8_1	0.962003	0.935186	0.842347	0.848635	0.694628	0.746338
HELZ2	cluster_8_1	0.756541	0.755159	0.764395	0.598783	0.706532	-0.237745
IFI27	cluster_8_1	0.981944	0.981173	0.834168	0.742447	0.752306	0.85548
IFI44	cluster_8_1	0.975064	0.972686	0.880264	0.71409	0.700849	0.680829
IFI44L	cluster_8_1	0.98134	0.982897	0.797364	0.830167	0.826723	0.804322
IFIT1	cluster_8_1	0.934741	0.92448	0.718386	0.708877	0.695552	0.754419
IFIT2	cluster_8_1	0.974881	0.974233	0.366892	0.076653	0.847364	0.735011
IFIT3	cluster_8_1	0.981673	0.977268	0.446793	0.349979	0.651562	0.45725
IFITM1	cluster_8_1	0.948554	0.958832	0.48932	0.473902	0.441224	0.47543
MX1	cluster_8_1	0.989435	0.989028	0.954733	0.958291	0.988609	0.988652
MX2	cluster_8_1	0.992568	0.994383	0.969048	0.972538	0.961417	0.962084
OAS1	cluster_8_1	0.961883	0.777203	0.863442	-0.470997	0.724213	-0.789817
OASL	cluster_8_1	0.973904	0.984376	0.763211	0.774647	0.806971	0.87199
PARP4	cluster_8_1	0.337799	0.512075	0.444956	0.816651	0.648407	0.615084
RSAD2	cluster_8_1	0.978595	0.970721	0.642741	0.756144	0.944696	0.207448
SAMD9L	cluster_8_1	0.994583	0.9823	0.862634	0.766369	0.615502	0.809605
USP18	cluster_8_1	0.983779	0.95664	0.859399	0.8062	0.7669	0.799119
XAF1	cluster_8_1	0.963402	0.981667	0.500935	0.479464	0.819432	0.833588
BST2	cluster_7_2	0.967936	0.989069	0.204257	0.455698	0.451395	0.879518
DDX60L	cluster_7_2	0.957117	0.951501	-0.258679	-0.269769	-0.406344	-0.446836
EPSTI1	cluster_7_2	0.995227	0.990773	0.681289	0.578171	0.0321293	-0.0211868
HERC5	cluster_7_2	0.974863	0.978106	0.818379	0.801939	0.768505	0.575084
IFI16	cluster_7_2	0.961815	0.972473	0.736906	0.664969	0.754742	0.674614
IFI6	cluster_7_2	0.843457	0.837055	0.800122	0.805014	0.256028	0.369102
ISG15	cluster_7_2	0.993975	0.993694	0.690004	0.713416	0.71835	0.73066
SLC15A3	cluster_7_2	0.975339	0.93461	-0.117009	-0.220359	0.371271	0.385027
SP110	cluster_7_2	0.899532	0.885579	0.50714	0.249264	-0.344778	-0.149294
USP41	cluster_7_2	0.956675	0.959728	0.49868	0.482384	0.944777	0.909973
ARVCF	cluster_7_1	0.569034	0.600456	0.38951	0.602577	0.422564	0.347415
BCL10	cluster_7_1	0.553064	0.584917	0.754135	0.731413	0.548753	0.478418
CEBPZOS	cluster_7_1	0.0576908	-0.32828	0.816308	0.573899	0.69446	0.828812
CRIM1	cluster_7_1	0.614158	0.566976	0.696843	0.708012	-0.193211	-0.240999
DHX58	cluster_7_1	0.952269	0.97392	-0.314192	-0.353466	0.332141	0.108635
GOLGA6C	cluster_7_1	0.491159	-0.169921	0.712439	0.413023	0.958254	-0.760735
GPR37	cluster_7_1	0.18095	0.670691	0.678799	-0.389377	0.571368	-0.186504
HIST1H3J	cluster_7_1	0.409009	0.43641	0.569048	0.549434	0.905816	0.922852
ICMT	cluster_7_1	0.473107	-0.408018	0.757018	0.604264	0.846023	-0.467944
IFIH1	cluster_7_1	0.882998	0.873085	0.870908	0.815237	0.859793	0.903726
IFIT5	cluster_7_1	0.988811	0.989272	0.081454	0.20041	0.800249	0.848314
LAMP3	cluster_7_1	0.991821	0.989596	0.82736	0.630317	0.892469	0.88306
LOC100128593	cluster_7_1	-0.333348	-0.391806	0.569841	0.517628	0.762347	0.63477
LOC100130171	cluster_7_1	0.0231763	0.0824764	0.645458	0.447448	0.722271	0.407552
LOC100131581	cluster_7_1	0.846071	0.77016	0.885715	-0.491897	0.259033	-0.244264
LRRD1	cluster_7_1	-0.421757	-0.60028	-0.350648	-0.294695	0.472311	0.55685
NACAP1	cluster_7_1	0.253556	0.443639	0.875258	0.904601	0.739657	0.768584
PARP10	cluster_7_1	0.964185	0.951051	0.623634	0.46385	0.953542	0.948099
PCMTD1	cluster_7_1	0.675131	-0.106347	0.719652	0.768611	0.712378	0.710156
PIAS4	cluster_7_1	0.751467	0.675965	0.727667	0.650922	0.827583	0.814959
POFUT1	cluster_7_1	0.862497	0.840416	0.905554	0.848872	0.39494	0.239598
RASGRP3	cluster_7_1	0.958081	0.96642	0.347764	0.377722	0.646527	0.396157
REC8	cluster_7_1	0.8957	0.980115	0.266399	-0.390722	0.632016	0.0294539
RNASE13	cluster_7_1	0.289658	0.399443	0.41221	-0.0904707	0.86076	0.0954632
RTP4	cluster_7_1	0.951338	0.577892	0.838456	0.692731	0.811003	0.73014
SNRPD2P2	cluster_7_1	0.774566	0.837313	0.826287	0.834373	0.283957	0.270049
TGM6	cluster_7_1	0.677733	0.511278	0.834184	0.663909	0.930457	0.921019
TPT1P8	cluster_7_1	0.56378	-0.401243	0.745443	0.299071	0.832585	0.548461
TRANK1	cluster_7_1	0.846493	0.790412	0.881465	0.828407	0.812424	0.722133
TRIM14	cluster_7_1	0.925161	0.910823	0.76553	0.772239	0.0721348	0.153834
VCY	cluster_7_1	-0.469165	-0.283224	0.539228	0.119655	0.0344002	-0.208418
ZNF680	cluster_7_1	0.597691	0.500636	-0.3346	-0.310842	-0.515203	-0.408954
APOL4	cluster_6_3	0.714672	-0.119145	-0.458421	-0.543143	0.921184	0.834766
BMP8B	cluster_6_3	0.940481	-0.314564	0.970156	0.633789	0.956057	0.103782
BPNT1	cluster_6_3	-0.755345	-0.79978	0.142781	0.268385	0.280176	0.197777
CCL24	cluster_6_3	0.331686	0.0310493	0.500416	0.317461	0.604615	-0.58375
CCM2	cluster_6_3	0.13234	0.0428571	0.867945	0.861027	0.0300126	-0.0171435
CEACAM20	cluster_6_3	0.413496	0.914176	0.877673	0.844465	0.281557	0.464404
CT47A11	cluster_6_3	0.756294	0.815926	0.917711	0.885066	0.928415	0.912851
DNAJA1P5	cluster_6_3	0.742301	0.721131	0.0197194	0.148678	0.906318	0.878296
DSTNP2	cluster_6_3	0.0433293	-0.517764	0.673966	0.0612226	-0.349123	0.236508
DTNA	cluster_6_3	0.831213	0.817984	0.879683	0.869332	0.974539	0.972387
DTX3L	cluster_6_3	0.953412	0.895461	0.0948335	-0.309961	0.331455	0.409812
GBP4	cluster_6_3	0.975179	0.951954	0.845797	0.8322	0.369284	0.176483
GJB4	cluster_6_3	0.720872	-0.108818	0.902687	0.752832	0.777952	0.616857
HCN2	cluster_6_3	0.605713	0.696858	0.980747	0.968754	0.732854	0.711302
HCRTR1	cluster_6_3	0.361103	-0.312494	0.80049	0.292615	0.845479	0.758251
HERC3	cluster_6_3	-0.322554	-0.260091	0.176217	-0.0199432	-0.0686906	0.0610602
HIST1H3D	cluster_6_3	0.495589	0.505751	0.652733	0.668156	0.301279	0.337386
HIST1H3F	cluster_6_3	0.834605	0.856854	0.85174	0.868612	0.683644	0.662217
HIST1H3H	cluster_6_3	-0.184027	-0.460094	0.902779	0.904195	0.810799	0.696284
HIST1H3I	cluster_6_3	-0.398763	0.104611	0.323281	0.852418	0.611861	0.660873
HSH2D	cluster_6_3	0.823439	0.639962	0.178969	-0.00140329	-0.0657592	-0.028108
HSP90AB6P	cluster_6_3	-0.343634	-0.272608	0.625525	0.655631	-0.0413513	0.0343793
IDO1	cluster_6_3	0.95416	0.945095	-0.535027	-0.521283	0.913741	0.882037
IFITM2	cluster_6_3	0.927519	0.890984	-0.361253	-0.450864	0.111809	-0.0202641
IFITM3	cluster_6_3	0.924642	0.920154	-0.618839	-0.664662	-0.367256	-0.473437
JADE2	cluster_6_3	-0.533724	-0.588198	0.456114	0.504332	-0.019334	-0.403493
KCNT1	cluster_6_3	0.323356	0.279674	0.528514	0.37954	0.482929	0.674475
KIAA1524	cluster_6_3	0.42883	0.562491	0.309545	0.338428	0.13263	0.296466
KIRREL2	cluster_6_3	0.385202	0.240608	0.942503	0.964314	0.792492	0.711232
KRTAP10-10	cluster_6_3	0.217312	0.235793	0.805701	0.664278	0.970041	0.935294
KRTAP19-2	cluster_6_3	0.478775	0.198745	0.378382	0.74691	0.848784	0.950839
KRTAP5-2	cluster_6_3	0.240406	0.196812	0.63574	0.622348	0.792868	0.794807
LAP3	cluster_6_3	0.994924	0.99498	0.551003	0.551549	-0.233955	-0.230027
LGALS9C	cluster_6_3	0.976461	0.855683	-0.129808	0.0769521	0.374737	0.616694
LINC00924	cluster_6_3	0.689492	0.496084	0.844156	0.550846	0.951681	0.878961
LINC01101	cluster_6_3	0.796456	0.782086	0.737196	0.702452	0.772899	0.798485
LOC100130560	cluster_6_3	-0.0634832	0.22252	0.379132	0.342079	0.347951	0.379607
LOC100130654	cluster_6_3	-0.190256	-0.183809	0.370705	0.354011	0.85597	0.851624
LOC100506955	cluster_6_3	0.80885	0.829873	0.704326	0.679474	0.398445	0.482592
LOC146795	cluster_6_3	-0.0285192	0.226209	0.777376	0.854828	0.855418	0.844128
LOC1720	cluster_6_3	-0.718571	-0.742093	0.768294	0.766402	-0.19066	-0.383815
LOC646214	cluster_6_3	-0.675343	0.341602	0.195902	0.468375	0.659092	-0.0688506
LOC729080	cluster_6_3	0.531159	0.544477	0.785826	0.711373	0.842603	0.59756
MED29	cluster_6_3	0.921189	-0.724308	0.673944	0.653762	0.767181	0.821435
MT3	cluster_6_3	-0.141137	-0.324069	0.791899	0.128112	0.732957	0.423184
NMI	cluster_6_3	0.82271	0.823018	0.120664	0.0152164	0.272246	0.352282
OSTCP1	cluster_6_3	0.864624	0.116549	0.885036	-0.314766	-0.0193914	-0.855453
OTOF	cluster_6_3	0.0652306	0.00890328	0.736965	0.791164	0.769784	0.862827
PABPC3	cluster_6_3	-0.250202	-0.5682	0.697969	0.264207	0.512561	0.345285
PARP14	cluster_6_3	0.993408	0.985294	-0.408462	-0.503118	-0.617124	-0.537493
PHF11	cluster_6_3	0.884765	0.909645	0.870583	0.871913	0.301766	0.319647
PNPT1	cluster_6_3	0.953162	0.947936	0.084386	-0.0293762	0.248025	0.427104
PPIAL4G	cluster_6_3	0.868413	0.894549	-0.379132	-0.0784606	0.484473	0.678273
QKI	cluster_6_3	0.569719	0.415511	0.181082	0.865515	-0.0678932	-0.133614
RAB33B	cluster_6_3	-0.357405	-0.0600675	0.682184	0.375235	0.253594	0.286322
RABL2B	cluster_6_3	0.111492	0.154993	-0.502506	-0.576488	0.799577	0.892011
RBM20	cluster_6_3	0.737664	0.656311	0.230048	-0.217752	-0.284124	-0.371855
RHBDL1	cluster_6_3	0.56874	0.700092	0.828023	0.841534	0.930926	0.909295
SLC25A51	cluster_6_3	0.894564	0.74943	0.934021	-0.932619	0.972738	0.191515
SMURF1	cluster_6_3	0.647055	0.407918	-0.0123868	-0.0190126	0.338927	0.578241
TAP1	cluster_6_3	0.945102	0.862677	0.152745	0.138931	0.633755	0.648632
TBC1D3B	cluster_6_3	0.235926	-0.0474371	-0.0887926	-0.397349	0.791718	0.631054
TCEAL2	cluster_6_3	0.837583	0.885167	0.757082	0.536744	0.0908352	0.50478
TLN2	cluster_6_3	0.873802	0.89836	0.447621	0.503988	0.191047	0.13414
TMEM27	cluster_6_3	0.97015	0.964998	-0.0350825	-0.249751	0.686929	0.667142
TNFSF10	cluster_6_3	0.886186	0.606855	-0.0300722	0.144451	0.854013	0.767603
WDR17	cluster_6_3	-0.777805	-0.700209	-0.455031	-0.689848	0.0826926	0.131593
ZNF808	cluster_6_3	0.898291	0.8516	0.724631	0.629872	0.893282	0.758477
ACTG1P4	cluster_6_2	-0.266883	-0.264469	0.299096	0.293621	0.269999	0.266176
APOL6	cluster_6_2	0.236033	0.0494929	-0.0614606	0.194503	0.0560654	0.0239352
CAV3	cluster_6_2	0.77232	0.727164	0.79062	0.803919	0.129093	0.140362
DDX60	cluster_6_2	0.962663	0.964527	0.137738	0.0491319	0.234665	-0.23273
HERC6	cluster_6_2	0.736769	0.77549	0.642355	0.688392	0.426439	0.336595
IFITM4P	cluster_6_2	0.926633	0.940691	0.423224	0.844977	0.121054	0.694201
OAS3	cluster_6_2	0.883226	0.827801	0.742414	0.397424	0.326042	0.0131499
PARP12	cluster_6_2	0.813239	0.747354	0.319669	0.35764	0.0486919	0.096308
PARP9	cluster_6_2	0.920788	0.922651	0.332421	0.318566	-0.604747	-0.625022
SAMD9	cluster_6_2	0.93711	0.938426	0.649547	0.502106	0.183331	0.169379
SAMHD1	cluster_6_2	0.871106	0.907317	-0.693156	-0.318827	-0.821838	-0.611469
SGSM2	cluster_6_2	0.181486	0.0437858	0.872924	0.867055	0.963221	0.958751
OAS2	cluster_6_2	0.827871	0.831702	0.497668	0.46388	0.0987928	0.0796068
ABHD13	cluster_6_1	0.140176	0.270914	0.564599	0.382582	0.795913	-0.632025
ACE2	cluster_6_1	0.508375	0.20139	0.823601	0.824889	0.618279	0.373297
ACKR1	cluster_6_1	-0.163716	-0.130176	0.741705	0.754932	0.852251	0.851916
ADPRH	cluster_6_1	0.738879	0.229672	0.817053	0.124558	0.555216	0.181387
AGAP7P	cluster_6_1	0.170893	0.0268113	0.523978	0.408738	0.665962	0.596695
ALG10	cluster_6_1	-0.0819866	-0.263859	0.96608	0.928644	0.753048	0.838891
AMPD3	cluster_6_1	-0.657435	-0.115716	0.227152	-0.259959	0.135725	0.0316398
ANK2	cluster_6_1	0.0319678	0.68639	-0.572995	0.486037	-0.0731022	-0.142877
ANKFY1	cluster_6_1	0.430896	0.284901	0.462566	0.414038	0.749336	0.719514
ANKRD37	cluster_6_1	0.796205	-0.846779	0.548893	-0.184105	0.126152	0.357867
ANO8	cluster_6_1	-0.359502	-0.0293984	0.248454	0.729687	0.496365	0.653739
AP5S1	cluster_6_1	-0.190665	0.0330451	0.25284	-0.197891	0.0645379	-0.0984987
APOL2	cluster_6_1	-0.224414	-0.347322	0.970043	0.958465	0.886875	0.737172
ARSJ	cluster_6_1	-0.187757	-0.00915695	0.357112	0.154795	0.78395	0.683793
ASB10	cluster_6_1	-0.341811	-0.27703	0.729024	0.786596	0.959718	0.923942
ASTN2	cluster_6_1	0.414947	0.504035	0.80107	0.714701	-0.216413	-0.321141
ATP10A	cluster_6_1	0.579375	0.587018	0.688684	0.275024	0.600772	0.46499
B3GALT5-AS1	cluster_6_1	0.629264	0.468556	0.783628	-0.637166	0.780005	-0.12361
BCL7B	cluster_6_1	0.840304	0.837987	-0.487112	-0.543992	0.785827	0.820282
BMS1P6	cluster_6_1	0.351341	0.344324	0.847415	0.825921	0.849361	0.732542
BTN2A1	cluster_6_1	-0.72106	-0.608596	0.254248	0.0830504	0.762745	0.707258
C17orf67	cluster_6_1	0.532754	0.289619	-0.511016	-0.641555	0.254103	0.424977
C18orf12	cluster_6_1	0.778955	0.822254	0.957651	0.954899	0.943526	0.9351
C20orf144	cluster_6_1	0.595985	0.396809	0.636243	0.615273	0.923199	0.493792
C5orf58	cluster_6_1	0.573023	0.644497	0.822846	0.812948	0.736971	0.674229
C6orf25	cluster_6_1	0.220394	0.281811	-0.358646	-0.289737	0.0842163	0.260534
C8orf31	cluster_6_1	0.752647	0.702884	0.196496	0.20028	0.234093	0.367209
CABP7	cluster_6_1	0.856774	0.73237	0.374238	0.535601	0.826971	0.919031
CACNA1C	cluster_6_1	0.924072	0.88704	0.895986	0.793475	0.961254	0.909555
CAPN10	cluster_6_1	0.634863	0.183842	0.566206	0.430209	0.531118	0.656162
CARD16	cluster_6_1	0.163557	0.194062	0.373995	0.216061	0.382454	0.482543
CCDC68	cluster_6_1	0.619865	0.697752	0.808726	0.84342	0.926694	0.900918
CD79A	cluster_6_1	0.592248	-0.775233	0.983596	0.977856	0.963424	0.922604
CHKB-AS1	cluster_6_1	-0.656439	-0.685815	0.224126	0.0392628	0.0451129	0.074684
CIITA	cluster_6_1	-0.0205268	0.583568	0.567761	0.678986	0.687506	0.495833
CLK3	cluster_6_1	-0.753556	-0.764617	-0.0342582	0.0142269	0.361799	0.342827
CLN8	cluster_6_1	0.34757	-0.0418399	0.437728	0.263378	0.154772	-0.628823
CMTM1	cluster_6_1	-0.190534	-0.172653	0.9793	0.983059	0.809515	0.830327
COX20	cluster_6_1	-0.394299	-0.297897	-0.119884	0.474379	0.74833	0.796327
CRACR2B	cluster_6_1	0.545738	0.617275	0.937946	0.810487	0.633173	0.657664
CXCL8	cluster_6_1	-0.66868	-0.638119	-0.682675	-0.852349	0.937304	0.932863
CXorf38	cluster_6_1	0.163692	-0.0125544	0.472442	-0.0270612	-0.385027	-0.285003
CYP1A2	cluster_6_1	-0.0892925	-0.578309	0.425641	0.345732	0.943279	0.943202
CYP2J2	cluster_6_1	0.887301	0.850842	0.900896	0.812388	0.572531	0.728219
DAGLA	cluster_6_1	0.524129	-0.0251935	0.864876	0.645784	0.854289	0.615135
DCHS2	cluster_6_1	0.373635	0.379288	0.409499	0.628563	0.664734	0.75489
DEFB132	cluster_6_1	-0.0409226	-0.1303	0.845448	0.957974	0.728667	0.272584
DIS3L2	cluster_6_1	-0.0813778	-0.0627765	0.645065	0.566138	0.670195	0.709496
DNAJC18	cluster_6_1	0.793159	0.792084	0.608909	0.30032	0.876321	0.901277
DZIP1L	cluster_6_1	-0.00719597	-0.46809	0.940426	0.92037	0.923574	0.548062
ERN2	cluster_6_1	0.449318	0.38864	0.591094	0.465559	0.41485	0.196244
F2RL3	cluster_6_1	-0.458334	-0.309013	0.408841	0.368243	0.906968	0.913313
FAM122C	cluster_6_1	0.887349	0.905263	0.382326	0.370076	0.730359	0.714152
FAM181A	cluster_6_1	0.278028	0.0951102	0.38025	0.278637	0.884587	0.673149
FAM210A	cluster_6_1	0.23675	0.0666257	0.60259	0.580467	-0.487589	-0.54437
FAM214B	cluster_6_1	0.200808	0.783657	0.781715	0.88776	0.670736	0.364286
FAM46A	cluster_6_1	0.737947	0.750971	-0.165152	-0.185881	0.739971	0.661183
FAM83H-AS1	cluster_6_1	0.971048	0.941774	0.971554	0.95488	0.976249	0.884722
FAM84A	cluster_6_1	-0.571031	0.438901	0.495724	0.127375	0.91391	0.501299
FAP	cluster_6_1	0.871929	0.909406	0.1381	0.633792	0.615068	0.67562
FAT3	cluster_6_1	0.850241	0.867855	0.630551	0.598492	0.913663	0.92205
FBLL1	cluster_6_1	-0.0234834	-0.384871	0.609034	0.710404	0.595089	0.941546
FBXL16	cluster_6_1	0.767341	0.697531	0.919849	0.940475	0.913828	0.906574
FCER1G	cluster_6_1	0.516714	0.502151	0.495391	0.314799	0.805897	0.832102
FGF2	cluster_6_1	0.250245	0.0777873	-0.793111	-0.840119	0.231527	0.467415
FLYWCH2	cluster_6_1	-0.862248	-0.835641	0.356097	0.401458	0.379961	0.00766445
FRS3	cluster_6_1	0.0204305	0.0906533	0.347441	0.326753	0.828293	0.818531
FSTL4	cluster_6_1	-0.449911	-0.392319	0.414603	0.423956	0.88298	0.79149
FZR1	cluster_6_1	0.0763503	0.0242679	-0.587159	-0.6992	0.624925	0.612102
GAS2L1P2	cluster_6_1	0.626333	0.512632	0.0937642	-0.0741676	0.748232	0.850177
GEMIN2	cluster_6_1	-0.250181	-0.464764	0.748927	0.206539	0.869111	0.820754
GEMIN8P4	cluster_6_1	-0.187984	0.715854	0.27551	0.819297	0.722126	0.520341
GGN	cluster_6_1	0.652353	0.479897	-0.392007	-0.128861	0.264043	0.437804
GGT1	cluster_6_1	0.793894	0.857101	0.383896	0.380132	0.365727	-0.114914
GRIA4	cluster_6_1	0.0643657	-0.00365683	0.793715	0.823037	0.620969	0.613867
GRID2IP	cluster_6_1	-0.010609	-0.0838038	0.97721	0.975249	0.929976	0.942311
GRIN3B	cluster_6_1	0.770526	0.782008	0.355505	0.35132	0.792934	0.827006
GSDMC	cluster_6_1	0.546956	-0.0203572	0.41037	0.374593	0.222324	0.211352
HEXDC	cluster_6_1	0.329783	0.934043	0.865612	0.349225	0.702512	0.365609
HINT3	cluster_6_1	0.356021	0.792786	0.843543	0.841281	0.779152	0.944917
HPCA	cluster_6_1	-0.736112	-0.77858	0.40578	0.202586	0.779011	0.713304
HRASLS2	cluster_6_1	0.279568	0.417464	0.563754	0.725407	0.895378	0.914406
IL1RN	cluster_6_1	0.784683	0.306877	0.480953	-0.602458	0.411137	0.806557
IL22RA1	cluster_6_1	0.891577	0.724193	0.942013	0.810984	0.900672	0.965611
IL4I1	cluster_6_1	0.632289	0.57577	0.722727	0.73085	0.9158	0.939563
ISG20	cluster_6_1	0.944232	0.920363	0.813432	0.819631	0.376945	0.483076
JMJD1C-AS1	cluster_6_1	0.0724315	-0.0917992	0.732876	0.450322	0.923002	0.0854385
KIAA1217	cluster_6_1	0.286101	0.333038	0.0765098	0.049721	0.892546	0.886506
KPNA1	cluster_6_1	0.764472	0.408104	0.739651	0.703458	0.884132	0.935548
KRTAP19-8	cluster_6_1	0.244565	0.763281	0.92504	0.0202104	0.936556	0.0817915
KRTAP3-3	cluster_6_1	0.403597	0.533381	0.576277	0.810052	0.77114	0.500708
KRTAP9-1	cluster_6_1	0.432406	0.724412	0.917434	0.894494	0.846925	0.711348
LINC00858	cluster_6_1	0.854422	0.755985	0.914457	0.499007	0.971579	0.913224
LINC00923	cluster_6_1	-0.0590515	0.367986	0.840854	0.580432	0.919798	0.757408
LINC00930	cluster_6_1	0.667694	0.426592	0.875888	0.904876	0.706505	0.702806
LINC00941	cluster_6_1	0.675474	0.814194	0.583118	0.452478	0.523702	0.416099
LINC01144	cluster_6_1	0.251015	0.572268	0.133531	0.35063	0.61031	0.821351
LINC01220	cluster_6_1	0.647139	0.587725	0.781189	0.71219	0.870997	0.910229
LINC01432	cluster_6_1	0.337657	0.336671	0.910457	0.826234	0.28539	0.949153
LINGO4	cluster_6_1	0.75677	0.764614	0.441796	0.455327	0.955937	0.946099
LOC100128714	cluster_6_1	0.536635	0.527405	0.466622	0.425949	0.540219	0.510086
LOC100129596	cluster_6_1	0.342947	0.35725	0.854953	0.769076	0.887209	0.907403
LOC100130916	cluster_6_1	-0.355255	0.845048	0.703883	0.669148	0.794276	0.644539
LOC100507431	cluster_6_1	0.430148	0.628012	-0.188897	0.273516	0.743788	0.101933
LOC113230	cluster_6_1	0.392633	0.319577	0.958607	0.955929	0.977655	0.986431
LOC145474	cluster_6_1	0.829963	0.748808	0.0528502	-0.752494	0.471732	-0.382081
LOC284014	cluster_6_1	0.934601	0.892324	0.928553	0.900264	0.967333	0.964624
LOC284080	cluster_6_1	0.927315	0.776064	0.631649	-0.241162	0.613895	0.290283
LOC284379	cluster_6_1	0.573588	0.462522	0.345905	0.194148	0.390547	-0.0537193
LOC285095	cluster_6_1	0.0348905	-0.0445648	0.737312	0.766031	0.922101	0.903758
LOC389641	cluster_6_1	0.378467	-0.142766	-0.232981	0.104524	0.881419	0.931215
LOC647086	cluster_6_1	0.0649708	0.230612	0.581164	0.652836	0.215083	0.137071
LOC730020	cluster_6_1	0.926126	0.948885	0.745187	0.718563	0.571086	0.617704
LOC730338	cluster_6_1	0.706928	0.643949	-0.150007	-0.135821	0.387839	0.298415
LONP2	cluster_6_1	0.854188	0.73621	0.778334	0.665403	-0.176693	-0.169558
LRRC57	cluster_6_1	0.784081	0.733335	0.76302	0.867049	0.762749	0.772339
METTL25	cluster_6_1	0.834383	0.755035	0.60091	0.384324	0.898504	0.793648
MGC34796	cluster_6_1	0.0110556	-0.486626	0.0635078	0.273852	0.584135	0.542997
MMP17	cluster_6_1	0.689502	0.703624	0.585035	0.55058	0.684026	0.665728
MMP28	cluster_6_1	0.31336	0.561281	0.801816	0.789881	0.715223	0.677324
MOP-1	cluster_6_1	0.78222	0.62354	0.683594	0.747777	0.324964	0.354255
MRPL42P5	cluster_6_1	0.435705	0.525153	0.936178	0.944106	0.889226	0.823562
MRPL57	cluster_6_1	0.787574	0.703596	0.668968	0.684426	0.887805	0.895376
MT1M	cluster_6_1	0.900282	0.712017	0.257139	0.799887	0.340088	0.637753
MT2A	cluster_6_1	0.866062	0.861732	0.658487	0.495931	0.788855	0.801242
MTERF1	cluster_6_1	0.960097	0.816632	0.608496	-0.315431	0.845162	0.218146
MTMR9LP	cluster_6_1	0.885427	0.703765	0.778684	0.512492	0.967039	0.911907
NCOA7	cluster_6_1	0.559338	0.345631	-0.874979	-0.911541	0.759061	0.658626
NCS1	cluster_6_1	-0.591361	-0.669219	0.446428	0.111463	0.829211	0.924412
NDUFAF4P1	cluster_6_1	-0.275907	-0.713483	0.476327	0.295863	0.228655	0.433104
NECAB1	cluster_6_1	0.718806	0.755309	0.667076	0.723064	0.0232953	0.0285612
NEURL1	cluster_6_1	-0.537647	-0.832902	0.191073	-0.9581	0.871476	-0.281237
NKAPL	cluster_6_1	0.821404	0.878703	0.770968	0.6094	0.901639	0.961672
NLRC5	cluster_6_1	0.374705	0.400361	0.234585	0.263017	0.474546	0.452461
NNAT	cluster_6_1	0.456974	-0.803387	0.0710671	0.216405	0.949534	0.852458
NOL6	cluster_6_1	0.00806909	-0.271963	0.902296	0.830168	0.818025	0.738732
NPHP4	cluster_6_1	0.483647	0.408594	0.879421	0.604304	0.420511	0.44149
NTRK3	cluster_6_1	0.830661	0.711049	0.578008	0.786786	0.906688	0.934567
NUDT16P1	cluster_6_1	0.587115	0.362371	-0.0715798	-0.0146269	0.855773	0.778818
ODF3B	cluster_6_1	0.93703	0.797746	-0.0153043	-0.0542824	0.326328	0.298558
OR10G2	cluster_6_1	0.871536	0.888245	0.964927	0.939153	0.994536	0.983605
OR5L2	cluster_6_1	0.625668	0.226566	0.870845	0.728404	0.491174	0.478828
OXTR	cluster_6_1	-0.924346	0.132265	0.532111	0.185927	-0.598934	-0.519323
PATL2	cluster_6_1	0.842646	0.695963	0.643359	0.731951	0.0449834	0.277884
PCBD2	cluster_6_1	-0.62234	-0.330911	0.725136	0.387906	0.658743	0.717317
PDGFRL	cluster_6_1	0.0578343	-0.139598	0.789819	0.886763	-0.094457	0.264079
PEBP4	cluster_6_1	0.673771	0.750218	0.970019	0.967337	0.972653	0.974913
PF4	cluster_6_1	-0.841838	-0.949147	-0.0420303	-0.724896	0.881971	0.637564
PHACTR2	cluster_6_1	0.412956	0.325541	0.645026	0.764212	0.556224	0.770017
PI15	cluster_6_1	-0.450471	-0.291151	0.215003	0.236054	0.534125	0.227515
PLCH2	cluster_6_1	0.268808	0.706887	0.113696	0.0265073	0.464026	0.17
PLEKHA4	cluster_6_1	0.854493	0.886655	0.909618	0.908755	0.121909	0.0947268
PML	cluster_6_1	0.688389	0.43721	0.613126	0.475794	-0.21056	0.647868
PPFIBP1	cluster_6_1	0.43172	0.336311	0.761612	0.593621	0.667736	0.618278
PPP1R14A	cluster_6_1	0.875497	0.804046	0.937902	0.960266	0.974373	0.971073
PRB1	cluster_6_1	0.361869	0.652415	0.967888	0.975783	0.960128	0.96284
PRSS36	cluster_6_1	-0.544508	-0.623526	0.0787283	-0.368643	0.519468	-0.249325
RAB12	cluster_6_1	0.775559	0.758568	-0.225719	-0.15262	0.115453	0.122146
RANBP3	cluster_6_1	0.231783	0.387231	0.864315	0.90004	0.87099	0.956383
RBM11	cluster_6_1	0.410307	-0.247096	0.808902	0.741596	0.444917	0.21156
REREP3	cluster_6_1	0.247967	0.422914	0.83331	0.786435	0.938538	0.950116
RINT1	cluster_6_1	-0.457591	-0.40954	0.389887	0.422953	0.98316	0.972106
RMND5A	cluster_6_1	0.299909	-0.670113	0.224566	0.239757	0.666686	0.957758
RNF113B	cluster_6_1	0.0688667	0.0589514	0.73952	0.704381	0.477472	0.488026
RNF224	cluster_6_1	-0.293159	-0.257157	0.659969	0.654721	0.0712542	0.0887807
RPL23AP64	cluster_6_1	0.490847	0.490757	0.83508	0.878212	0.863032	0.872146
RPL23AP87	cluster_6_1	-0.755317	-0.841089	0.833904	0.790214	0.785566	0.781901
S1PR3	cluster_6_1	0.58112	0.727789	0.215654	0.271676	0.766599	0.80647
SAA2	cluster_6_1	0.670528	0.35367	0.942011	0.952274	0.544406	0.455951
SDHAF4	cluster_6_1	0.728293	0.550763	0.719197	0.123753	0.959952	0.889673
SECTM1	cluster_6_1	0.813798	0.757093	0.728591	0.125696	-0.0568562	-0.39458
SEL1L	cluster_6_1	0.656834	0.0201284	-0.483106	-0.455914	0.309954	0.343158
SEPT7P2	cluster_6_1	0.133784	0.0978089	0.854064	0.296385	0.551299	0.466849
SFTPA2	cluster_6_1	0.0433139	0.457198	-0.161864	-0.393481	0.579563	-0.170223
SIGLEC16	cluster_6_1	0.880165	0.56306	-0.036008	-0.66046	0.968506	0.946721
SIRPB1	cluster_6_1	-0.282123	-0.252635	0.944575	0.942132	0.9077	0.924114
SKA3	cluster_6_1	0.562159	0.753179	0.637772	0.579661	0.836346	0.669602
SLC25A22	cluster_6_1	0.0559238	-0.0253668	0.305208	0.25129	0.634026	0.600894
SLC25A53	cluster_6_1	0.551094	0.359503	0.232809	0.452125	0.304273	0.464461
SLC30A6	cluster_6_1	0.188958	0.115691	-0.121132	-0.192801	0.0997526	-0.310698
SLC34A3	cluster_6_1	0.793988	0.644879	0.924367	0.906157	0.917067	0.888352
SMCR8	cluster_6_1	-0.0964313	0.134622	0.728685	-0.143195	0.860682	-0.618784
SMIM5	cluster_6_1	0.714818	0.831502	0.862164	0.878039	0.892933	0.967219
SMPD3	cluster_6_1	-0.565793	0.653986	-0.0239357	0.727187	0.474863	0.706076
SNCB	cluster_6_1	0.275289	0.452837	0.710441	0.801774	0.909918	0.934439
SNHG10	cluster_6_1	0.739153	0.732751	0.839124	0.776772	0.852687	0.944222
SPIRE2	cluster_6_1	-0.0342736	-0.0969514	0.348119	0.305149	0.755533	0.532916
SPSB1	cluster_6_1	0.912601	0.868068	0.477212	0.133631	0.112571	0.130004
SPTBN2	cluster_6_1	0.0263917	-0.0310535	0.890572	0.86238	0.768268	0.68945
SRP9	cluster_6_1	-0.124724	-0.150805	0.720652	0.699406	0.823	0.679512
STX17-AS1	cluster_6_1	0.282331	-0.398386	0.477358	0.628832	0.86905	0.488348
SULT1A2	cluster_6_1	-0.579376	-0.438113	0.84466	0.817922	0.23632	-0.0717494
SUSD3	cluster_6_1	0.323393	0.483048	0.280018	0.379363	0.676552	0.694145
SUSD4	cluster_6_1	0.801481	0.688428	0.618573	0.646768	0.898905	0.80527
TATDN3	cluster_6_1	-0.213334	-0.133423	-0.628744	-0.649106	-0.0925512	-0.190686
TBC1D32	cluster_6_1	0.197365	-0.110456	0.272374	-0.0108307	0.92364	0.910614
TBXA2R	cluster_6_1	0.800142	0.736799	0.705703	0.749021	0.435379	0.580306
TDRD7	cluster_6_1	0.96931	0.882551	0.084617	-0.36078	0.784406	0.369248
THAP5	cluster_6_1	0.914102	-0.531763	0.817683	-0.397083	-0.347447	-0.256444
TLR3	cluster_6_1	0.25945	0.13673	-0.0120538	-0.719489	0.268452	-0.179354
TMEM120B	cluster_6_1	0.522143	0.394764	-0.111201	-0.532147	-0.356549	-0.40436
TMEM121	cluster_6_1	0.110369	0.19756	0.322727	0.198213	0.800893	0.824255
TNFRSF25	cluster_6_1	0.563182	-0.17208	0.791352	0.265726	0.319928	0.136916
TONSL	cluster_6_1	-0.101755	-0.277374	0.0696429	-0.449903	0.187822	-0.422002
TPMT	cluster_6_1	-0.162067	0.656998	-0.0143576	0.306797	0.794856	0.816826
TRAF7	cluster_6_1	0.831959	0.962451	0.798048	0.604042	0.919421	0.215644
TREX1	cluster_6_1	0.962792	0.976943	0.757786	0.863274	0.565259	0.670963
TRIM23	cluster_6_1	0.610182	0.623791	0.943116	0.933274	0.562963	0.546259
TSPAN12	cluster_6_1	0.295703	0.253978	-0.173037	-0.201888	0.902602	0.902631
TUBA8	cluster_6_1	-0.708445	-0.399713	-0.325636	-0.0985264	0.778364	0.822864
TUBBP5	cluster_6_1	0.155409	-0.190295	-0.588168	0.129652	0.587669	0.517305
UBD	cluster_6_1	0.821291	0.496744	0.491497	0.915433	0.0589241	0.350383
UBQLNL	cluster_6_1	0.922048	0.903502	-0.796808	-0.324052	0.43924	0.819073
UCP3	cluster_6_1	0.448829	0.8435	0.675707	0.837923	0.944819	0.926007
USP49	cluster_6_1	0.198355	0.169068	0.283051	0.337337	-0.444949	-0.505081
WASH3P	cluster_6_1	0.453647	0.485134	0.909562	0.954866	0.919772	0.771434
XDH	cluster_6_1	0.594872	0.57709	0.360141	0.545916	-0.193229	-0.171182
XRCC6P5	cluster_6_1	0.824569	0.87519	0.933637	0.931867	-0.0358422	-0.0427271
ZBTB3	cluster_6_1	0.800136	0.683457	0.881238	0.459999	0.742619	0.415486
ZBTB49	cluster_6_1	0.0691111	0.169886	0.372979	0.381801	0.69293	0.705958
ZC3HAV1	cluster_6_1	0.278035	-0.601775	-0.696306	-0.683185	0.765822	0.883767
ZCCHC2	cluster_6_1	0.718246	-0.0537934	-0.111201	0.599305	0.71422	-0.830935
ZCCHC4	cluster_6_1	-0.57975	-0.646491	0.943951	0.976146	0.898639	0.904641
ZHX1-C8orf76	cluster_6_1	-0.179977	-0.0994528	0.5084	0.859528	0.921751	0.833253
ZIC4	cluster_6_1	0.366393	0.412106	0.850544	0.845308	0.879757	0.876378
ZNF319	cluster_6_1	0.68988	0.510255	0.73525	0.731512	0.716395	0.602356
ZNF43	cluster_6_1	0.237097	0.367305	0.682697	-0.333045	0.691591	-0.61958
ZNF844	cluster_6_1	-0.602752	0.0923502	-0.131512	-0.114006	0.80072	0.85772
ACER2	cluster_5_2	0.627242	0.572588	0.406814	0.400802	0.737839	0.701816
ACSL3	cluster_5_2	-0.292255	-0.385338	0.94428	0.951269	0.699931	0.750568
ADAR	cluster_5_2	0.984189	0.9893	0.0540084	-0.143999	0.826162	0.781677
AGPAT3	cluster_5_2	-0.206346	-0.190297	0.950522	0.947787	0.514172	0.614647
AKR1C4	cluster_5_2	-0.552045	-0.0181168	0.668938	0.602511	0.975459	0.966542
ALPPL2	cluster_5_2	0.856419	0.868102	-0.116086	0.0635326	0.264314	0.438494
AMZ1	cluster_5_2	0.955191	0.894874	0.99288	0.986456	0.970055	0.965189
ANKRD45	cluster_5_2	0.36934	0.355295	0.425456	0.398694	0.545512	0.427735
ANXA2P3	cluster_5_2	0.0735483	0.0973656	0.808048	0.791457	0.876003	0.832001
ARHGAP4	cluster_5_2	0.077662	0.117593	0.896795	0.859619	0.37511	0.394868
ARHGEF15	cluster_5_2	0.457344	-0.398896	0.907469	-0.0961831	0.67622	0.18303
ATOH8	cluster_5_2	0.607463	0.572736	0.567861	0.558344	0.685437	0.670226
BORCS8	cluster_5_2	-0.393008	-0.414984	0.895645	0.898071	0.812028	0.7908
C17orf50	cluster_5_2	0.198042	-0.0113092	0.739944	0.737319	0.84297	0.680577
C17orf74	cluster_5_2	0.202408	-0.0538364	0.712826	0.777107	-0.187561	0.275284
C19orf66	cluster_5_2	0.946856	0.912002	0.538117	0.308853	0.363281	0.720687
C1orf123	cluster_5_2	-0.00954794	-0.331603	0.285259	0.522207	0.251639	0.483465
C2	cluster_5_2	-0.183185	-0.269472	0.119139	0.119143	0.851869	0.817492
C2orf50	cluster_5_2	0.289296	0.402055	0.521199	0.614684	0.683118	0.717067
C5orf56	cluster_5_2	-0.339813	-0.502339	-0.116192	-0.0455833	-0.400219	-0.425846
C8orf58	cluster_5_2	-0.1772	-0.292679	0.965332	0.956488	0.853647	0.768681
C9orf153	cluster_5_2	-0.177148	-0.131925	0.774626	0.635938	0.941486	0.877372
CBX2	cluster_5_2	0.557301	0.479154	0.833991	0.899536	0.806375	0.799785
CCDC129	cluster_5_2	0.808177	0.818084	0.76449	0.783975	0.911701	0.91544
CCDC61	cluster_5_2	0.556509	0.702356	0.523742	0.236441	0.722927	0.798146
CCR1	cluster_5_2	0.829967	0.854057	-0.724582	-0.74278	-0.427449	-0.0270122
CD300LB	cluster_5_2	0.763378	0.645601	0.609996	0.529588	0.624352	0.600813
CD8A	cluster_5_2	0.594187	0.625813	0.150534	0.0680629	0.571931	0.605724
CDCP2	cluster_5_2	-0.0940232	-0.0885969	0.817714	0.810301	0.956116	0.927555
CHIT1	cluster_5_2	0.175437	0.205684	0.894076	0.860456	0.0931445	0.261962
CLHC1	cluster_5_2	-0.118883	-0.113562	0.489632	0.598978	-0.824764	-0.751278
COL10A1	cluster_5_2	0.864612	0.873809	0.812796	0.82295	0.895761	0.897768
CPLX2	cluster_5_2	0.86967	0.876033	0.195178	0.212691	0.306567	0.307046
CST3	cluster_5_2	-0.37386	-0.310165	0.914089	0.952703	0.906775	0.821771
CTAGE1	cluster_5_2	-0.35546	-0.395024	0.604823	0.753053	0.876332	0.650584
DCT	cluster_5_2	0.464527	0.58273	0.508905	0.749431	0.818263	0.787673
DIRC1	cluster_5_2	-0.111276	0.0225709	0.726464	-0.482151	-0.243264	0.0107685
DNAJC5G	cluster_5_2	0.513567	0.230987	0.6878	-0.898234	0.871371	-0.469145
DSCR10	cluster_5_2	0.300622	0.319135	0.729837	0.617222	0.623204	0.645495
EDA2R	cluster_5_2	0.389929	0.343249	0.709147	0.634888	0.792622	0.791535
EIF1AY	cluster_5_2	0.406535	0.503009	0.93315	0.734081	0.661329	0.416726
EIF2AK2	cluster_5_2	0.966607	0.950737	0.779948	0.769315	-0.124984	-0.116367
EPHX3	cluster_5_2	0.736268	0.694101	0.800179	0.788787	-0.595729	-0.561397
ERVFRD-2	cluster_5_2	0.711952	0.761846	0.969598	0.974604	0.855901	0.879981
ERVH-3	cluster_5_2	0.488036	0.429565	0.753297	0.44781	0.894187	0.898558
FAM178B	cluster_5_2	0.108677	0.095788	0.443521	0.335411	0.137459	0.0831132
FLJ36000	cluster_5_2	0.904901	0.919475	0.960897	0.954947	0.460636	0.212678
FLJ37786	cluster_5_2	0.167268	0.160405	0.127024	-0.449341	-0.454981	0.478336
FMO1	cluster_5_2	0.335224	0.137238	0.632906	0.613884	0.260658	0.185822
GATSL3	cluster_5_2	-0.17937	-0.17937	0.248399	0.248399	-0.372266	-0.372266
GBGT1	cluster_5_2	0.791224	0.364164	0.463319	-0.346774	0.939549	0.356615
GBP1	cluster_5_2	0.311746	0.532468	0.466189	0.692276	0.781843	0.758222
GBP3	cluster_5_2	0.769599	0.762274	0.718423	0.757419	-0.108634	-0.0103649
GCLM	cluster_5_2	0.911933	0.907244	0.786699	0.862788	0.710765	0.57802
GP1BB	cluster_5_2	0.244736	0.08881	0.865362	0.858234	0.747846	0.78444
GPSM1	cluster_5_2	0.646307	0.613382	0.449532	0.433076	0.668377	0.657948
GRIK5	cluster_5_2	0.239154	-0.248251	0.690317	0.6158	0.760911	0.564334
GRIN2A	cluster_5_2	-0.0794122	-0.0951876	0.55871	0.429475	0.501983	0.481725
GYPA	cluster_5_2	0.80802	0.739776	0.904542	0.911768	0.992129	0.961962
HCRT	cluster_5_2	0.763472	0.753592	0.780408	0.785655	0.727631	0.74259
HIST1H4D	cluster_5_2	0.154151	0.329749	0.600213	0.627086	0.545627	0.48728
HMP19	cluster_5_2	0.398796	-0.0616375	0.760446	0.246608	0.596973	-0.21593
HRASLS5	cluster_5_2	0.952228	0.926308	0.973739	0.978628	0.915528	0.930097
HRH2	cluster_5_2	0.564068	0.225786	0.840206	-0.323505	0.859173	0.104511
IFI35	cluster_5_2	0.877555	0.92244	0.530943	0.113012	0.224979	0.237862
IL18RAP	cluster_5_2	0.955607	0.962563	0.474157	0.575071	0.543172	0.563322
ILDR1	cluster_5_2	0.781772	0.810913	0.852681	0.81348	0.913653	0.87555
ITGB2	cluster_5_2	0.294164	0.2117	0.812965	0.806783	0.367061	0.264565
KANK3	cluster_5_2	0.279525	0.323589	0.821487	0.776234	0.869375	0.846213
KCNK15	cluster_5_2	0.591155	0.629785	0.784075	0.835737	0.773255	0.67384
KIF19	cluster_5_2	0.363058	0.326571	0.702643	0.64166	0.464167	0.390417
KIF21B	cluster_5_2	0.604979	0.0626642	0.818499	-0.327152	0.569355	0.0589248
KRBA2	cluster_5_2	0.988981	0.9814	0.930567	0.921816	0.979901	0.961219
KRT31	cluster_5_2	0.810142	0.472501	0.909986	0.81939	0.864084	0.825927
KRT73	cluster_5_2	0.556716	0.246985	0.953515	0.559219	0.905691	0.273142
KRT81	cluster_5_2	-0.0456545	-0.091041	0.704601	0.667117	0.707731	0.714319
KRTAP10-12	cluster_5_2	0.637396	0.616457	0.878026	0.70996	0.66636	0.59466
KRTAP10-8	cluster_5_2	0.576412	0.510469	0.646501	0.735003	0.314128	0.417154
KRTAP19-5	cluster_5_2	0.206061	0.0888909	0.657387	0.674934	0.439163	0.515923
KRTAP5-4	cluster_5_2	0.584949	0.533405	0.776628	0.732766	0.914456	0.927093
KRTAP6-3	cluster_5_2	-0.298914	0.19487	0.813728	0.704841	0.730927	0.478931
KSR2	cluster_5_2	0.656735	0.106003	0.837238	0.538236	0.840735	0.833167
LANCL3	cluster_5_2	0.790267	0.709298	0.906084	-0.469646	0.652968	-0.278291
LAT2	cluster_5_2	0.991406	0.894891	0.996761	0.974713	0.992074	0.967398
LBX2-AS1	cluster_5_2	0.581298	0.568731	0.664483	0.705654	0.832044	0.875155
LENG8	cluster_5_2	0.803555	0.83551	0.870289	0.514349	0.881981	0.687721
LGALS3BP	cluster_5_2	0.924008	0.920575	0.821054	0.836052	0.893456	0.921141
LGALS9	cluster_5_2	0.629615	0.686327	-0.504341	-0.337983	0.540383	0.77599
LGR6	cluster_5_2	0.399012	0.388704	0.545675	0.399016	-0.489144	-0.493138
LILRB4	cluster_5_2	0.953773	0.81592	0.933397	0.97425	0.767619	0.774565
LINC00626	cluster_5_2	0.775293	0.865499	0.967315	0.923451	0.95406	0.908681
LINC00982	cluster_5_2	0.513273	0.413993	0.907476	0.885184	0.919024	0.909662
LMAN1L	cluster_5_2	0.690138	0.480609	0.828865	0.713402	0.534899	0.203024
LOC100128185	cluster_5_2	-0.188105	-0.22729	0.462143	0.361386	0.67888	0.529135
LOC100128843	cluster_5_2	0.79673	0.806926	0.670522	0.559223	0.929527	0.948147
LOC100131864	cluster_5_2	0.3547	0.249674	0.128336	-0.00168899	0.124897	0.140446
LOC100134868	cluster_5_2	0.71727	0.453549	0.890265	0.910178	0.959114	0.960927
LOC153811	cluster_5_2	0.713511	0.669015	0.79664	0.833615	0.585133	0.460823
LOC283270	cluster_5_2	0.537144	0.736423	0.687874	0.723853	0.833234	0.660785
LOC285957	cluster_5_2	0.700803	0.68506	0.812885	0.916758	0.431166	0.554787
LOC389033	cluster_5_2	0.181824	0.185022	0.915523	0.925174	0.245762	0.228135
LOC393078	cluster_5_2	0.888302	0.920819	0.943046	0.961205	0.770044	0.805107
LOC400662	cluster_5_2	0.923197	0.908909	0.921498	0.962383	0.555138	0.799831
LOC401557	cluster_5_2	0.703848	0.686545	0.970453	0.978537	0.683268	0.755457
LOC441666	cluster_5_2	0.89504	0.585298	0.948067	0.153881	0.873566	0.389036
LOC647070	cluster_5_2	0.767664	-0.54289	0.702094	-0.435961	0.858251	0.707261
LRCH4	cluster_5_2	0.724614	0.542768	0.448634	0.488445	0.0448816	0.23462
LRP1	cluster_5_2	0.178404	-0.00248487	0.668074	0.243109	0.700133	0.792316
LRRC27	cluster_5_2	-0.653043	-0.810531	-0.209676	-0.193542	-0.673847	-0.763501
LYSMD3	cluster_5_2	0.490465	0.363835	0.788152	0.829067	0.421961	0.42077
MAP4	cluster_5_2	0.862332	0.867097	0.786768	0.85936	0.552229	0.544553
MOCS3	cluster_5_2	0.958383	0.45481	0.872693	0.877843	0.956123	0.935677
NAT8L	cluster_5_2	0.657192	0.619031	0.573796	0.433366	-0.104577	0.000781382
NEGR1	cluster_5_2	0.872603	0.888443	0.836657	0.762871	0.956512	0.964862
NT5C3A	cluster_5_2	0.544254	0.481917	0.706482	0.650465	0.276302	0.250638
NUTM2D	cluster_5_2	0.434693	0.452969	0.876119	0.828899	0.610558	0.528919
NYX	cluster_5_2	0.882441	0.935151	0.912111	0.929157	0.363989	0.41867
OR10H2	cluster_5_2	0.799798	0.78672	0.956839	0.950691	0.927292	0.94274
OR1F2P	cluster_5_2	0.370392	0.561703	0.833646	0.820879	0.53537	0.477961
OR1J4	cluster_5_2	0.689127	0.458511	0.48617	0.446294	0.418075	0.324698
OR1S1	cluster_5_2	0.832785	0.742963	0.468888	0.448207	0.109544	0.1113
OR6K2	cluster_5_2	0.516174	0.7376	0.875755	0.852029	0.315981	0.546813
OTUD6A	cluster_5_2	-0.0563202	0.0451575	0.781512	0.764719	0.600777	0.578972
P2RX3	cluster_5_2	0.177366	0.250395	0.280872	0.411941	0.888189	0.830117
PBOV1	cluster_5_2	0.401775	0.465653	0.840356	0.889227	0.562035	0.639528
PCED1B-AS1	cluster_5_2	0.75932	0.0818768	0.134066	0.737363	0.818872	0.869239
PSMB9	cluster_5_2	0.868325	0.868325	0.320889	0.320889	0.59554	0.59554
PTK2B	cluster_5_2	-0.0984762	0.520353	0.881458	0.741987	0.974231	0.864693
RAPGEF3	cluster_5_2	0.378607	0.319946	0.769739	0.652834	0.563293	0.541842
RASD1	cluster_5_2	0.79957	0.927029	0.435595	0.362622	0.518909	0.489647
RASD2	cluster_5_2	-0.243709	-0.286942	0.758831	0.723735	0.756004	0.744046
RBM43	cluster_5_2	0.331662	0.900808	-0.000381909	0.28248	0.553206	0.36112
RBMXL1	cluster_5_2	0.862525	-0.28392	0.788057	0.0995589	0.195574	-0.204733
RNF180	cluster_5_2	0.966555	0.974652	0.961938	0.95947	0.989196	0.988531
RNF213	cluster_5_2	0.728087	0.771823	-0.508909	-0.340924	0.512333	0.432103
RTBDN	cluster_5_2	0.567137	0.626293	0.203903	0.65382	-0.260782	0.323159
SCARNA9L	cluster_5_2	0.275614	0.297015	0.280959	0.335508	0.377906	0.218871
SEMA4A	cluster_5_2	0.576929	0.522705	0.719903	0.524834	0.659765	0.611109
SETP20	cluster_5_2	0.75296	0.691197	0.44934	0.481323	0.341834	0.37146
SIGLEC15	cluster_5_2	0.904316	0.151458	0.909401	0.894434	0.90721	0.875207
SLC12A5	cluster_5_2	0.886117	0.888129	0.878444	0.892412	0.928967	0.949007
SLC14A2	cluster_5_2	0.870031	0.873583	0.736557	0.667963	0.713591	0.752722
SLC19A3	cluster_5_2	-0.446443	-0.495303	-0.861991	-0.828757	0.784222	0.82964
SLC22A17	cluster_5_2	0.520315	0.512657	0.801098	0.892516	0.804483	0.844834
SLC22A23	cluster_5_2	-0.0711776	-0.0339849	0.723764	0.737484	-0.382866	-0.476366
SLC22A31	cluster_5_2	-0.0765676	0.0242287	0.295554	0.268156	-0.647806	-0.54735
SLC25A3P1	cluster_5_2	0.548689	0.548689	0.465414	0.465414	0.860625	0.860625
SLC5A6	cluster_5_2	0.529383	0.529009	0.508392	0.643312	0.944668	0.899547
SNORD12B	cluster_5_2	0.60921	0.508593	0.650912	0.476671	0.702319	0.297824
STAG3L2	cluster_5_2	0.495371	0.398852	0.124067	0.452518	0.899672	0.885835
TACR2	cluster_5_2	0.112295	0.105205	0.625259	0.725726	-0.0684413	0.260108
TBKBP1	cluster_5_2	-0.140776	-0.0605809	0.408258	0.500408	-0.832577	-0.794073
TCEANC2	cluster_5_2	-0.916329	-0.921837	0.371078	0.41239	0.74312	0.729451
TEX41	cluster_5_2	0.976419	0.976533	0.933736	0.887196	0.936816	0.901889
TGFA	cluster_5_2	0.495237	0.591913	0.768394	0.740848	0.557135	0.387258
TLE6	cluster_5_2	0.0716258	0.037014	0.603949	0.60761	0.44075	0.410391
TMED7-TICAM2	cluster_5_2	0.677225	0.671259	0.714108	0.823136	0.911202	0.90791
TMEM201	cluster_5_2	0.938814	0.915375	0.897869	0.908219	0.583027	0.613461
TMEM262	cluster_5_2	0.88755	0.917811	0.944638	0.967387	0.958556	0.965631
TNFAIP8L1	cluster_5_2	0.907422	0.951853	0.97398	0.9888	0.978559	0.98356
TNRC6C	cluster_5_2	0.982645	0.975345	0.547019	0.650844	0.846622	0.891929
TP53TG3	cluster_5_2	0.691006	0.603492	-0.530754	-0.460679	0.734058	0.723518
TPBGL	cluster_5_2	0.524561	0.495988	0.655115	0.609724	-0.121735	-0.516377
TRAPPC3L	cluster_5_2	0.939968	0.866396	0.976193	0.958356	0.948872	0.934557
TRIM34	cluster_5_2	-0.178854	-0.149482	0.481106	0.44154	0.314815	0.266179
TRIM5	cluster_5_2	0.947458	0.928344	-0.0508383	-0.0308345	-0.126792	-0.188662
TRPC6	cluster_5_2	0.940154	0.954163	0.60739	0.735986	0.9289	0.96219
TSNARE1	cluster_5_2	0.685631	0.665114	0.79625	0.921178	0.775405	0.274366
TTC36	cluster_5_2	-0.0816893	-0.634543	0.902707	0.832704	-0.563025	-0.115863
TUBA3FP	cluster_5_2	-0.0909929	0.147276	0.736982	0.747993	-0.109581	-0.0295482
UBE2L6	cluster_5_2	0.746496	0.754096	0.69112	0.681052	0.57525	0.364044
WNK4	cluster_5_2	0.421889	0.473728	0.932531	0.943792	-0.151919	-0.247909
ZAN	cluster_5_2	0.42493	0.464643	0.518388	0.476038	0.839191	0.657658
ZFP3	cluster_5_2	0.703117	0.674112	0.759481	0.134851	0.63389	0.519532
ZNF430	cluster_5_2	0.102917	0.184602	0.884646	0.588589	0.817431	0.744344
ZNF479	cluster_5_2	-0.667175	-0.778143	0.625024	0.596804	0.0852502	0.420978
ZNF676	cluster_5_2	0.952286	0.892365	0.501508	0.742688	0.562313	0.47372
ZNF732	cluster_5_2	0.789963	0.86922	0.380464	0.341641	0.790354	0.787953
ZNF736	cluster_5_2	0.914417	0.59678	0.742568	0.473065	0.498738	0.387098
ZNF737	cluster_5_2	0.665796	0.446838	0.658208	0.412878	0.504921	0.301299
ZNF763	cluster_5_2	0.973366	0.812636	0.989224	0.961959	0.976316	0.970099
ZNFX1	cluster_5_2	0.477554	0.424523	0.669671	0.760592	-0.786075	-0.805978
ACBD4	cluster_5_2	-0.00258123	-0.102966	0.778502	0.771598	0.792206	0.84707
ADAM7	cluster_5_2	0.00830376	0.0353265	0.481742	0.296542	0.80516	-0.0388172
DPT	cluster_5_2	0.609423	0.603247	0.707107	0.725768	0.967732	0.972808
LOC115110	cluster_5_2	0.626527	0.138771	0.636523	0.307485	0.802255	0.738214
MRGPRX4	cluster_5_2	0.708747	0.705477	0.757155	0.818795	0.815742	0.890514
MST152	cluster_5_2	0.566894	0.571571	0.126022	0.184872	0.561164	0.633519
SVEP1	cluster_5_2	0.33205	0.281122	0.602879	0.642542	0.553315	0.336505
TMEM140	cluster_5_2	0.660408	0.655678	0.811959	0.75585	0.65056	0.326
ABCD3	cluster_5_1	0.510493	0.215141	0.150464	-0.605176	0.0400598	0.3906
AQP7P3	cluster_5_1	-0.204545	-0.499667	0.861777	0.844544	0.839434	0.841809
ARMC9	cluster_5_1	0.105466	0.22476	0.541455	0.413652	0.53723	0.407456
ART4	cluster_5_1	0.58789	0.550091	0.461397	0.528752	-0.0820061	-0.103206
ATP6V1E2	cluster_5_1	-0.100896	-0.37494	0.229034	0.508778	0.559792	0.650876
BAIAP2-AS1	cluster_5_1	0.882621	0.603213	0.478341	0.404052	0.870715	0.826523
BLOC1S1	cluster_5_1	-0.340789	-0.344647	0.652477	0.608211	0.94781	0.945901
CAPN5	cluster_5_1	0.827112	0.794027	0.851763	0.929494	0.920023	0.952538
CAPN7	cluster_5_1	-0.102578	0.135367	-0.876429	-0.762576	-0.660626	-0.680349
CASC10	cluster_5_1	-0.229108	-0.290352	0.952278	0.897741	0.888	0.786635
CCDC107	cluster_5_1	0.770543	0.762916	0.906633	0.883543	0.874063	0.882635
CCT6B	cluster_5_1	0.878084	0.885607	0.888117	0.887005	0.605298	0.674119
CDC14C	cluster_5_1	0.907222	0.898374	0.774955	0.790606	0.201761	0.203171
CDH2	cluster_5_1	0.671561	0.636103	0.843213	0.795551	-0.219948	-0.365987
CDK20	cluster_5_1	0.628393	-0.0158059	0.921419	0.514466	0.704012	0.780117
CLEC11A	cluster_5_1	-0.643067	-0.705827	0.753624	0.680944	0.584122	0.493313
CPEB1	cluster_5_1	-0.512974	-0.480405	0.421704	0.389697	0.803618	0.765277
DHDH	cluster_5_1	-0.713941	-0.633883	0.121772	0.168346	0.701295	0.731975
DIO2	cluster_5_1	-0.144416	0.26927	0.0463787	-0.2507	0.123457	-0.188083
DISP2	cluster_5_1	0.522164	0.534123	0.386638	0.562988	0.435948	0.474276
DLG5-AS1	cluster_5_1	0.275364	-0.82821	0.962494	0.208418	0.94905	0.328633
DRD4	cluster_5_1	0.618867	0.675691	0.463183	0.63598	-0.175579	0.0613886
DUSP26	cluster_5_1	0.351625	0.512891	0.513032	-0.486182	0.788078	0.861463
ENPP1	cluster_5_1	-0.631008	-0.715027	0.855457	0.822698	0.483725	0.415219
ERICH2	cluster_5_1	-0.647384	-0.685779	0.336495	0.465502	0.81529	0.692357
FAM13A-AS1	cluster_5_1	0.793913	0.745116	-0.0958841	-0.427962	-0.556413	-0.639441
FAM71E1	cluster_5_1	-0.589763	-0.444032	0.916609	0.87473	0.0102648	0.441691
FBP1	cluster_5_1	0.393997	-0.116277	0.742776	0.594392	0.183725	-0.345116
FECH	cluster_5_1	0.684359	-0.431152	0.328458	0.657082	0.609046	0.4908
FLJ46906	cluster_5_1	0.429863	0.426933	0.306489	0.453243	0.296923	0.361725
FLYWCH1	cluster_5_1	0.814149	0.765332	0.629485	0.646003	0.788566	0.779555
FREM2	cluster_5_1	0.833849	0.738802	-0.850293	-0.885921	0.415876	0.308792
GABPB2	cluster_5_1	-0.552567	-0.673178	0.73953	0.711202	0.70791	0.608467
GALNT18	cluster_5_1	-0.161783	-0.517779	0.616917	-0.417666	-0.109798	-0.398997
GLYCTK	cluster_5_1	0.177464	0.117743	-0.126621	-0.587546	-0.14291	-0.52271
GNAZ	cluster_5_1	0.5555	0.751368	0.93017	0.915369	0.80778	0.9299
HHAT	cluster_5_1	0.835517	0.825335	0.825981	0.814599	0.734426	0.758048
HIST1H1C	cluster_5_1	-0.373514	-0.00838325	0.224508	-0.130784	0.104493	0.398503
HNRNPA0	cluster_5_1	-0.494278	-0.84487	0.493224	0.5755	0.414402	0.175934
IKBKAP	cluster_5_1	0.643529	0.856278	0.838849	0.702531	0.819423	0.695914
IL23A	cluster_5_1	0.501127	0.0773485	0.0453319	0.316788	0.652656	0.823862
IPO9	cluster_5_1	0.824227	0.635924	0.747042	0.453625	0.240307	0.28787
ITGAM	cluster_5_1	0.474946	0.471133	0.776009	0.815967	0.724043	0.755732
KBTBD11	cluster_5_1	0.292773	0.853747	0.091214	-0.736358	-0.345118	0.0722416
KTN1-AS1	cluster_5_1	0.700331	0.710735	0.719553	0.715873	0.638937	0.501432
LDHD	cluster_5_1	-0.382443	-0.451993	0.713223	0.61902	-0.0883581	-0.126783
LINC01124	cluster_5_1	0.528772	0.533499	-0.0360422	0.119849	0.0431212	0.312235
LOC100130691	cluster_5_1	-0.180943	-0.231647	0.846261	0.894393	0.248254	0.364716
LOC100131432	cluster_5_1	0.489928	0.476834	0.820021	0.829788	-0.0506551	0.100163
LOC100291323	cluster_5_1	0.342169	0.412466	0.386017	0.479012	0.376426	0.337848
LOC145783	cluster_5_1	0.289225	0.330799	-0.732975	-0.779926	0.548406	0.54246
LOC389247	cluster_5_1	0.677048	0.567729	-0.384423	-0.509619	0.81006	0.525601
LOC644450	cluster_5_1	0.434718	0.427016	0.943521	0.970327	0.554484	0.532472
LYG1	cluster_5_1	-0.268578	-0.762996	0.731672	0.505798	0.450553	-0.37249
MAP9	cluster_5_1	0.241772	-0.0996125	0.292344	0.495615	0.875031	0.661789
MFAP5	cluster_5_1	0.795065	0.773198	0.857452	0.858899	0.833231	0.832108
MGAT5B	cluster_5_1	-0.488304	0.163868	0.773632	0.871672	0.780479	0.757535
MTURN	cluster_5_1	-0.409709	-0.324019	-0.378301	-0.240697	0.706302	0.763329
MYCNOS	cluster_5_1	-0.564998	-0.515508	0.572607	0.248918	0.92039	0.638321
NANOS1	cluster_5_1	0.595562	0.392076	0.215645	-0.756921	-0.247832	-0.874303
NGEF	cluster_5_1	0.517552	0.426001	0.872832	0.754269	0.768162	0.671665
NTNG1	cluster_5_1	0.0115065	0.59863	0.0578704	0.382354	-0.282984	0.391735
OLFM4	cluster_5_1	0.388061	-0.0722772	0.28763	-0.607598	0.548873	0.286223
P2RY2	cluster_5_1	0.62525	0.464389	0.716521	0.792431	0.907628	0.639093
P3H2	cluster_5_1	0.776088	0.40106	0.767998	0.804816	0.23336	0.252286
PCNXL2	cluster_5_1	0.574419	0.511471	-0.0379078	-0.112784	0.393048	0.27858
PCSK4	cluster_5_1	0.659104	0.676505	0.865655	0.838168	0.66769	0.671479
PDGFA	cluster_5_1	0.233574	0.251832	0.798309	0.796702	0.383889	0.589585
PITPNM3	cluster_5_1	0.313908	0.277069	-0.279313	-0.21433	-0.798615	-0.759643
PRR19	cluster_5_1	0.30488	0.426229	0.433567	0.396965	0.947483	0.935319
RAB14	cluster_5_1	0.183755	0.309071	-0.139638	-0.354572	0.568506	0.415795
RADIL	cluster_5_1	-0.249773	0.575155	0.054512	0.692186	0.305761	0.544971
RGMB-AS1	cluster_5_1	0.607905	0.645463	0.296792	0.169169	0.838335	0.908518
RGS5	cluster_5_1	0.542066	-0.149159	-0.427825	-0.608762	0.23514	-0.519904
RIN1	cluster_5_1	-0.104387	0.143729	0.910892	0.934137	0.916949	0.951018
RNF216	cluster_5_1	-0.0369294	-0.13886	0.907961	0.890944	0.81847	0.826828
ROM1	cluster_5_1	0.705178	0.748069	-0.184534	-0.133994	0.119456	0.232568
RPL27A	cluster_5_1	-0.153879	-0.0476978	0.4482	0.607395	0.480022	0.733746
RPP30	cluster_5_1	-0.463731	-0.36402	0.878792	-0.00984988	0.864875	0.729657
SIK2	cluster_5_1	0.0325335	-0.0870395	-0.0131478	-0.266833	0.79389	0.734681
SLC25A34	cluster_5_1	-0.698303	-0.684236	0.178357	0.869438	-0.235308	0.539873
SMIM12	cluster_5_1	-0.331295	-0.325925	-0.193903	-0.145033	0.830775	0.822953
SNAI3-AS1	cluster_5_1	-0.167891	0.0555913	0.822825	0.750313	0.442214	0.371408
SPINK13	cluster_5_1	0.00890563	0.0022275	0.793488	0.762981	0.674674	0.672734
SRSF12	cluster_5_1	-0.372716	-0.279434	-0.188252	-0.24556	0.715485	0.72975
SUN3	cluster_5_1	-0.0951011	-0.358463	0.206819	0.146873	0.86083	0.933495
TMEM170B	cluster_5_1	0.23194	0.28145	-0.13211	0.118896	0.895331	0.433114
TMEM191A	cluster_5_1	0.174508	0.247572	0.896272	0.847995	0.970698	0.962714
TMEM52	cluster_5_1	0.599192	0.705246	0.756954	0.788556	0.864494	0.849744
TMPO-AS1	cluster_5_1	0.384927	0.28789	-0.270969	-0.1905	0.956972	0.96247
TOLLIP	cluster_5_1	-0.48458	-0.216103	0.713922	0.802382	0.787127	0.794096
TPD52	cluster_5_1	0.199532	0.249272	-0.436263	-0.402046	0.81738	0.759608
TTC12	cluster_5_1	-0.253784	-0.817161	0.146674	-0.554095	0.0448946	-0.300815
TXNDC15	cluster_5_1	0.443397	0.443504	0.532037	0.525508	0.945247	0.943785
TYMSOS	cluster_5_1	0.833422	0.770942	-0.105616	-0.061118	0.581509	0.632789
USP9X	cluster_5_1	0.181403	0.128186	0.344338	0.249801	0.964723	0.938654
ZNF469	cluster_5_1	-0.234738	-0.0527817	0.168688	-0.200571	0.13544	-0.126191
ZNF527	cluster_5_1	-0.382769	0.123869	-0.520814	-0.458066	0.511153	0.73233
ACTL8	cluster_5_1	0.366425	0.287173	0.416229	0.341237	-0.332159	-0.321326
ACTR3BP2	cluster_5_1	0.370775	0.338942	0.71476	0.616079	0.519363	0.23816
ADAM33	cluster_5_1	0.47912	0.248424	0.871345	0.826321	0.870316	0.892795
ADGRD2	cluster_5_1	0.115629	0.184093	0.526522	0.472777	0.6886	0.762779
AGRP	cluster_5_1	0.253362	0.369347	0.961922	0.936799	0.769186	0.740612
AMPH	cluster_5_1	0.524557	0.541528	0.375101	0.398367	0.144469	0.40252
ASIC2	cluster_5_1	0.529551	0.597724	0.848114	0.834272	0.21423	0.480327
ATP2B1	cluster_5_1	-0.534086	-0.535615	0.81215	0.857082	0.555558	0.619432
C9orf131	cluster_5_1	-0.421959	-0.475712	0.924665	0.829528	0.831292	0.825422
C9orf173	cluster_5_1	0.506336	0.466582	0.389613	0.436906	0.75703	0.790241
CASC22	cluster_5_1	0.47206	0.458821	0.808856	0.603023	0.901481	0.450735
CASQ1	cluster_5_1	0.899159	0.60604	0.959028	0.787387	0.899769	0.822654
CATSPERG	cluster_5_1	0.937766	0.940743	0.763133	0.782104	0.900773	0.903734
CCDC96	cluster_5_1	0.915848	0.912162	0.915405	0.919955	0.722658	0.71407
CD177	cluster_5_1	0.614933	0.488262	0.900388	0.783422	0.536403	0.23359
CNIH2	cluster_5_1	-0.322632	-0.592469	0.949022	0.69208	0.978504	0.946574
CNTNAP3B	cluster_5_1	0.861017	0.516557	0.686863	0.804236	0.064407	-0.485854
CRABP1	cluster_5_1	0.572124	-0.863057	0.803698	-0.476688	0.742051	-0.0672749
CRHR2	cluster_5_1	0.777836	0.777301	0.684468	0.746977	0.108475	0.191436
CSTF3-AS1	cluster_5_1	0.670953	0.686101	0.618189	0.670471	0.541917	0.483071
CT55	cluster_5_1	0.909885	0.852784	0.888893	0.89298	0.681171	0.528632
CYP3A43	cluster_5_1	0.165259	0.0431646	-0.00805203	-0.0164119	0.631273	0.605234
DAAM2	cluster_5_1	0.631269	0.573262	0.500169	0.386519	0.708992	0.704376
DNAJC22	cluster_5_1	0.745538	0.268042	0.825773	0.904038	0.814338	0.725202
FAM156B	cluster_5_1	-0.126241	-0.126241	0.408196	0.408196	0.525025	0.525025
FCN3	cluster_5_1	0.758975	0.199714	0.841898	0.834012	0.579828	0.764444
FMN1	cluster_5_1	0.670433	0.671899	0.771111	0.682631	0.523054	0.386436
FOXI3	cluster_5_1	0.237947	0.161184	0.905927	0.914449	0.908692	0.931486
FRMD1	cluster_5_1	0.611406	0.401997	0.856459	0.891843	0.88877	0.845326
GAPT	cluster_5_1	0.747202	0.85624	0.899885	0.933946	0.909661	0.927543
GBA3	cluster_5_1	0.236734	0.274539	-0.0899955	0.454054	0.462126	0.443079
GCG	cluster_5_1	0.514318	0.532641	0.344576	0.399815	0.310445	0.158266
GPAT2	cluster_5_1	0.669685	0.406423	0.772772	0.717794	0.499656	0.446676
GPR119	cluster_5_1	0.855977	0.855072	0.912612	0.931801	0.925578	0.939344
GPR88	cluster_5_1	0.766581	0.774375	0.888864	0.829562	0.822794	0.634674
GPX7	cluster_5_1	-0.0167441	0.0736685	0.531071	0.316363	0.251849	0.197441
GRK5	cluster_5_1	0.088026	0.122262	0.677808	0.673427	0.579164	0.482032
HAP1	cluster_5_1	0.8414	0.841512	0.525667	0.467412	0.818262	0.817552
HCST	cluster_5_1	0.853198	0.840257	0.727509	0.827219	0.891148	0.92201
HEPH	cluster_5_1	0.121944	0.202691	0.969888	0.967301	0.810296	0.823517
HERC2P7	cluster_5_1	0.922547	0.601505	0.786103	0.2872	0.778743	0.495553
HRH3	cluster_5_1	0.440616	0.545327	0.656769	0.744355	0.952917	0.934366
ICOSLG	cluster_5_1	0.77442	0.782173	-0.183111	0.156018	0.266748	0.0705319
IFFO1	cluster_5_1	0.738444	0.732775	0.679746	0.693604	0.774775	0.780769
IFT22	cluster_5_1	0.425092	0.191829	0.882045	0.809981	0.888781	0.944975
IL34	cluster_5_1	0.298568	0.522702	0.647055	0.476375	0.776141	0.8329
INHBC	cluster_5_1	0.166092	0.165904	0.756752	0.774212	0.722873	0.72561
IQSEC3	cluster_5_1	0.838927	0.736313	0.874997	0.900305	0.736215	0.825089
ISLR	cluster_5_1	0.753823	0.673446	0.897556	0.887821	0.905645	0.899339
ISLR2	cluster_5_1	0.888235	0.835166	0.800535	0.744601	0.506053	0.65747
KLK2	cluster_5_1	0.734931	0.437956	0.831669	0.846844	0.375581	0.0778605
KRT32	cluster_5_1	0.535175	0.542771	0.287509	0.247136	0.139993	-0.362014
KRTAP10-2	cluster_5_1	0.457577	0.684277	0.146745	0.0718266	0.872381	0.87192
KRTAP10-5	cluster_5_1	0.73146	0.709708	0.602805	0.623914	-0.419039	-0.408695
KRTAP10-9	cluster_5_1	0.770207	0.730348	0.371153	0.313226	0.95035	0.949758
KRTAP11-1	cluster_5_1	0.503525	0.649297	0.800663	0.851142	0.667309	0.676449
LCE1E	cluster_5_1	0.267246	0.344201	0.606341	0.743411	0.865281	0.888961
LILRA1	cluster_5_1	0.398481	0.272271	0.856827	0.851932	0.624813	0.567064
LINC00106	cluster_5_1	0.615164	0.611716	0.758792	0.727753	0.673582	0.758732
LINC01160	cluster_5_1	0.768337	0.682973	0.781733	0.421807	0.93999	0.856742
LOC100128644	cluster_5_1	0.201296	0.281554	0.284308	0.210023	-0.115263	-0.220889
LOC100130276	cluster_5_1	-0.348885	-0.405793	0.621189	0.361665	0.579295	0.549634
LOC100130540	cluster_5_1	0.71667	0.707114	0.927517	0.928431	0.777499	0.792373
LOC100130745	cluster_5_1	0.17353	0.265863	0.72279	0.748618	0.134402	0.174974
LOC100131150	cluster_5_1	0.708034	0.693012	0.743016	0.786472	0.867647	0.737506
LOC100132790	cluster_5_1	0.637029	0.713249	0.772973	-0.102676	0.826834	0.800328
LOC221946	cluster_5_1	0.888131	0.540058	0.723983	0.000252597	0.803422	0.0853903
LOC400464	cluster_5_1	0.924862	0.882153	0.79028	0.837851	0.351786	0.335587
LOC440461	cluster_5_1	0.823181	0.775406	0.859923	0.828325	0.746336	0.525006
LOC642980	cluster_5_1	0.414203	0.417471	0.239477	0.116824	0.501169	0.464396
LOC649294	cluster_5_1	0.33992	0.36473	0.700553	0.713894	0.687315	0.81797
LRRC10	cluster_5_1	0.0544121	-0.0162526	0.80972	0.757747	0.308936	0.256983
LRRN2	cluster_5_1	0.613462	0.228876	0.764325	0.622547	0.620098	0.555855
LRRTM1	cluster_5_1	0.892601	0.811216	0.479936	0.529507	0.214014	0.343628
LZTS3	cluster_5_1	0.775603	0.759329	0.434966	0.584342	0.2337	0.327644
MAG	cluster_5_1	0.62792	0.17652	0.526345	0.284596	0.577257	0.397216
MAGEA6	cluster_5_1	0.261533	0.29405	0.827322	0.869384	0.668662	0.668982
MOG	cluster_5_1	0.791452	0.798268	0.814043	0.813473	0.506639	0.460086
MRGPRE	cluster_5_1	0.912422	0.928615	0.957358	0.920975	0.942139	0.951039
MS4A1	cluster_5_1	0.0447769	-0.131741	0.783271	0.78911	0.816689	0.881576
MS4A5	cluster_5_1	0.831541	0.444936	0.36471	0.611933	0.585471	0.148889
MUSK	cluster_5_1	0.262707	0.0462852	0.300277	0.157935	0.581264	0.453108
NBPF6	cluster_5_1	0.881824	0.86249	0.884233	0.909558	0.680673	0.739384
NCALD	cluster_5_1	0.0808795	0.0723107	0.71787	0.735138	0.216837	0.198826
NCAM2	cluster_5_1	0.856524	0.816968	0.83688	0.851305	0.5983	0.461544
NDUFB2-AS1	cluster_5_1	0.814412	0.565499	0.967337	0.841135	0.928046	0.588397
NLRP14	cluster_5_1	0.328019	0.254788	0.709538	0.569633	0.709871	0.604699
OR10J5	cluster_5_1	0.58215	0.382605	0.757865	0.590006	0.961322	0.963625
OR2AG2	cluster_5_1	0.789257	0.792117	0.64486	0.764641	0.968978	0.982402
OR4A15	cluster_5_1	0.75418	0.557336	0.871697	0.305597	0.95001	0.78734
OR5K3	cluster_5_1	0.394966	0.638184	0.963958	0.826959	0.827078	0.814568
OR7A17	cluster_5_1	0.176089	0.327708	0.579128	0.394888	0.567692	0.38696
OR7C2	cluster_5_1	0.489372	0.447157	0.866198	0.87174	0.78851	0.839577
OR7G2	cluster_5_1	0.440939	0.430766	0.806328	0.814298	0.444807	0.381472
OR8D1	cluster_5_1	-0.0426906	0.023571	0.0360392	0.104527	-0.0518281	-0.260062
OR8D2	cluster_5_1	-0.145516	-0.0964029	0.415436	0.240011	0.571911	0.723793
PANX3	cluster_5_1	0.503195	0.54646	0.726383	0.72432	0.643249	0.611733
PDZD4	cluster_5_1	0.634487	-0.119164	0.837527	-0.234556	0.312424	0.528023
PP12613	cluster_5_1	0.729963	0.751274	0.0138768	0.0785313	0.168942	0.170617
PRR21	cluster_5_1	0.444831	0.542726	0.871063	0.861302	0.603906	0.599035
RLTPR	cluster_5_1	0.495217	0.419528	0.891406	0.76712	0.856079	0.79413
SCG3	cluster_5_1	0.493876	0.570028	0.849718	0.831444	0.541468	0.568028
SLC16A11	cluster_5_1	0.622435	0.847183	0.839588	0.743169	0.723021	0.731013
SLC18A3	cluster_5_1	0.171076	0.219512	0.511103	0.333346	0.140821	-0.253615
SLC45A2	cluster_5_1	0.048683	0.24777	0.737472	0.348647	0.615961	-0.0793622
SMR3A	cluster_5_1	0.865319	0.86201	0.925423	0.944432	0.660172	0.67431
SPRR2E	cluster_5_1	0.223985	0.137977	0.473815	0.479954	-0.389673	-0.504252
STEAP4	cluster_5_1	0.314821	0.226373	0.29625	0.410779	-0.0634957	0.109268
SV2A	cluster_5_1	0.553546	0.540015	0.331971	0.366742	0.144359	0.140759
TAAR8	cluster_5_1	0.964473	0.959728	0.885248	0.864694	0.759984	0.713924
THEG	cluster_5_1	0.18178	-0.00361582	0.736649	0.719585	0.086708	-0.346376
TMEM151A	cluster_5_1	0.223575	0.275895	0.86361	0.858407	0.439689	0.480879
TMEM211	cluster_5_1	0.310769	0.35047	0.718112	0.71505	0.472622	0.455239
TMEM221	cluster_5_1	0.679611	0.618137	0.905595	0.887406	0.42927	0.281712
TMEM40	cluster_5_1	0.857523	0.778264	0.289604	0.170229	0.673398	0.448487
TRAF3IP3	cluster_5_1	0.599262	0.523665	-0.447974	-0.108024	0.512286	0.560611
TRIM10	cluster_5_1	0.62862	0.559388	0.937211	0.942288	0.280104	0.295536
TRIM77	cluster_5_1	0.282957	0.29376	0.585768	0.612721	0.702665	0.624109
TSSK1B	cluster_5_1	0.849727	0.728365	0.267742	0.138115	0.362324	0.391329
UGT3A1	cluster_5_1	0.746688	0.734062	0.872939	0.778061	0.593461	0.711228
UMODL1	cluster_5_1	0.588323	0.495693	0.241227	0.441634	0.197198	0.514238
UPB1	cluster_5_1	0.491159	0.563549	0.388516	0.358597	0.313002	0.340883
VASH2	cluster_5_1	0.650244	0.704025	-0.213175	-0.24734	-0.393372	-0.416501
VPS53	cluster_5_1	0.616842	0.510994	0.843691	0.786607	0.577249	0.530833
WAS	cluster_5_1	0.879616	0.410145	0.920302	0.869641	0.838827	0.309593
BTN1A1	cluster_4_4	0.892828	0.785711	0.3017	0.36037	-0.603533	-0.6177
FAM172A	cluster_4_4	-0.564743	-0.4577	-0.180139	-0.620082	-0.0334046	-0.498937
LONRF2	cluster_4_4	0.000521447	0.0470347	-0.870351	0.652165	-0.772773	0.0483635
TNFRSF10D	cluster_4_4	0.307398	0.293393	-0.848111	-0.837194	-0.414094	-0.507529
MZB1	cluster_4_4	0.648729	0.623273	0.686564	0.608873	0.726729	0.705946
DCST2	cluster_4_3	0.723225	0.823687	0.0426387	0.145879	-0.0850935	0.402548
FAM182A	cluster_4_3	0.220581	-0.00687208	0.352905	-0.272497	0.433379	0.1484
FCRL2	cluster_4_3	0.757763	0.677146	0.561002	0.568391	0.0653966	0.0682766
FLJ42393	cluster_4_3	0.1907	0.197372	0.637863	0.661228	0.385081	0.437005
KIAA1683	cluster_4_3	0.444214	0.599857	0.440229	0.444779	0.874236	0.644105
KLK3	cluster_4_3	0.776712	0.707532	0.193963	0.217626	-0.835961	-0.808362
KRTAP4-8	cluster_4_3	0.523634	0.523634	0.777498	0.777498	0.223998	0.223998
OPRL1	cluster_4_3	0.268286	0.26196	-0.166644	0.488161	-0.415775	0.668546
OR2B2	cluster_4_3	0.803746	0.82924	0.412507	0.433414	0.723306	0.672896
PRRG4	cluster_4_3	-0.123592	-0.166258	-0.845817	-0.84827	-0.426667	-0.474037
PTCH2	cluster_4_3	0.718467	0.702577	0.774809	0.756803	0.609002	0.585435
RAD51AP2	cluster_4_3	0.294726	0.4123	0.578531	0.337013	0.234924	0.104612
SFXN4	cluster_4_3	0.409334	0.450904	0.762761	0.759726	0.598825	0.535946
SGTA	cluster_4_3	0.686945	0.77039	0.61731	0.661133	0.572394	0.580729
SLC22A20	cluster_4_3	0.763758	0.635936	0.895761	0.906733	0.946221	0.883451
TNK1	cluster_4_3	0.516055	0.508083	0.817065	0.833783	0.743906	0.680254
ZNF578	cluster_4_3	0.826662	0.900419	0.752106	0.746192	0.704485	0.489509
APBB1	cluster_4_3	0.637931	0.632978	0.618301	0.596827	0.141285	0.151601
BTNL8	cluster_4_3	0.714794	0.704621	0.497113	0.504225	0.832885	0.771638
C1orf194	cluster_4_3	0.147142	0.182901	0.7503	0.690961	0.304833	0.254946
C7orf34	cluster_4_3	0.800615	0.636005	0.855298	0.844838	0.0532003	-0.329629
CGB2	cluster_4_3	0.576808	0.688232	0.693606	0.762105	0.260827	0.619673
CHRFAM7A	cluster_4_3	0.159037	0.135561	0.0494699	0.0656762	-0.372119	-0.162776
CRNN	cluster_4_3	0.456959	0.462676	0.940807	0.937417	0.654135	0.664002
CSN1S1	cluster_4_3	0.894101	0.935731	0.756214	0.823767	0.556451	0.564101
DAB1	cluster_4_3	0.734277	0.700194	0.823056	0.786055	0.767449	0.658346
ELN	cluster_4_3	0.425575	0.491015	0.841386	0.927061	0.525265	0.776553
GFRA4	cluster_4_3	0.802281	0.795871	0.889409	0.874742	0.890993	0.892932
GPR158-AS1	cluster_4_3	-0.128424	0.545179	0.896859	0.891111	0.686111	0.86386
GPR55	cluster_4_3	0.727392	0.761496	0.714522	0.71288	0.381389	0.389712
HYOU1	cluster_4_3	-0.0625642	-0.153041	0.791367	0.695837	0.68932	0.731986
IL9R	cluster_4_3	0.876346	0.887727	0.903565	0.923355	0.860333	0.866609
KCNQ2	cluster_4_3	0.671673	0.380453	-0.0314988	-0.0348249	-0.445222	-0.54242
KIR3DX1	cluster_4_3	0.759015	0.711828	0.857581	0.839771	-0.0830872	0.20717
LDLRAD4	cluster_4_3	0.718848	0.625252	0.892766	0.611684	0.71621	0.594756
LOC100130920	cluster_4_3	0.450397	0.46468	0.487678	0.498925	0.583075	0.696814
LYRM4-AS1	cluster_4_3	0.65997	0.637197	0.908245	0.903069	0.852814	0.848209
OPN1SW	cluster_4_3	0.839976	0.864665	0.563301	0.613454	0.839567	0.850528
OR10P1	cluster_4_3	0.52047	0.515945	0.896999	0.896362	0.805169	0.807181
OR1D2	cluster_4_3	0.492139	0.456391	0.706586	0.698637	0.879076	0.858452
OR4X2	cluster_4_3	0.807323	0.802483	0.859767	0.866819	0.254016	-0.0816345
OR51G1	cluster_4_3	0.802521	0.789294	0.872425	0.877598	0.630539	0.689162
OR52I1	cluster_4_3	0.890649	0.885446	0.95682	0.952423	0.615519	0.597817
PCDHGB1	cluster_4_3	0.676758	0.251482	0.298462	0.211606	0.13098	-0.0846034
SLC17A7	cluster_4_3	0.183635	0.0848823	0.671863	0.550992	-0.424966	-0.51804
TP53TG3C	cluster_4_3	0.921355	0.923894	0.823365	0.832268	0.459625	0.511164
TRHR	cluster_4_3	0.538317	0.42707	0.803302	0.766803	0.560625	0.489488
TRPM3	cluster_4_3	0.744447	0.665863	0.880173	0.810979	0.716104	0.582929
TTTY13	cluster_4_3	0.70474	0.562811	0.915977	0.835662	0.444717	-0.00713577
WFDC9	cluster_4_3	0.904662	0.874323	0.631117	0.642583	0.946994	0.87399
ACTN3	cluster_4_2	-0.568275	-0.483641	0.502442	0.531023	0.846929	0.816358
AGER	cluster_4_2	-0.0775959	-0.398895	0.60738	-0.331346	0.685358	0.544553
ANKRD36	cluster_4_2	0.115627	0.192237	0.695283	0.729833	0.167386	0.326893
C10orf76	cluster_4_2	0.00468331	0.0759003	0.288753	-0.1176	0.952803	0.970782
C6orf106	cluster_4_2	0.18186	0.611803	0.823574	0.789045	0.903064	0.88954
CDC34	cluster_4_2	-0.617518	-0.628535	0.161894	0.0885944	0.767358	0.893675
CDH7	cluster_4_2	0.586877	0.662	0.594305	0.589324	0.723747	0.714573
CDK14	cluster_4_2	0.0435027	-0.235929	-0.170817	-0.435637	0.653031	0.43258
CENPP	cluster_4_2	0.816841	0.841738	0.646247	0.71212	0.87357	0.862222
CHD1L	cluster_4_2	0.201959	0.163351	0.411811	0.415868	0.956657	0.955833
CNN3	cluster_4_2	0.386209	0.359183	0.261685	0.206822	0.850832	0.823086
COL27A1	cluster_4_2	0.0629829	0.0442384	0.925992	0.90962	0.911879	0.830767
DEFB129	cluster_4_2	0.639795	0.254951	0.786991	0.623334	0.572001	0.235669
FLJ30064	cluster_4_2	0.755643	0.715881	0.521783	0.812945	0.389437	0.888524
GJD4	cluster_4_2	-0.129493	-0.164451	0.77471	0.766041	0.780919	0.808137
GOLIM4	cluster_4_2	-0.462285	-0.584648	-0.287774	-0.199882	-0.630015	-0.585771
GPC3	cluster_4_2	0.677859	0.647831	0.87888	0.912254	0.829209	0.875034
HNRNPCL1	cluster_4_2	-0.334166	-0.272372	0.861273	0.918447	0.871635	0.919277
JRK	cluster_4_2	0.459207	0.467527	0.850302	0.78681	0.866839	0.863131
KATNB1	cluster_4_2	-0.40992	0.800843	0.225654	0.77387	0.445768	0.724815
KCNH2	cluster_4_2	0.601293	0.268468	0.691039	0.34441	0.293319	0.452019
KRTAP4-11	cluster_4_2	0.126469	0.186406	0.569626	0.316489	0.532724	0.180724
LINC00637	cluster_4_2	-0.767708	-0.0310486	0.366202	0.573576	0.908156	0.919367
LOC100130430	cluster_4_2	0.398427	0.607818	0.876812	0.918154	0.610973	0.64488
LOC727721	cluster_4_2	-0.139931	-0.211159	0.384929	0.268121	0.842112	0.817267
LYNX1	cluster_4_2	0.605808	0.601025	0.822056	0.738957	0.987918	0.981886
MDGA1	cluster_4_2	0.768847	0.749607	0.710628	0.649082	0.749731	0.683495
MYO1F	cluster_4_2	0.308135	0.254695	0.452928	0.413795	0.906633	0.936063
OTOA	cluster_4_2	-0.201499	-0.496317	0.64512	0.617793	0.75964	0.778161
PCDHA7	cluster_4_2	0.195431	0.23867	0.267766	0.26946	0.59715	0.592701
PDS5A	cluster_4_2	0.776282	0.776086	0.614578	0.57947	0.6831	0.490326
PIKFYVE	cluster_4_2	0.143773	-0.0167912	0.772822	0.64504	0.901919	0.894146
RASGRP4	cluster_4_2	0.510551	0.628921	-0.586574	-0.391035	0.938275	0.942971
RERG	cluster_4_2	0.18936	-0.135649	0.833347	0.889846	0.397145	0.560094
RNF19B	cluster_4_2	0.534036	0.612866	0.249538	-0.0802466	0.235939	0.445019
RTN3	cluster_4_2	-0.351873	-0.279079	0.82724	0.828066	0.496406	0.594122
SLC16A4	cluster_4_2	-0.198213	-0.0359201	0.711666	0.815544	0.728341	0.776424
SRSF9	cluster_4_2	0.910508	0.946718	0.87214	0.770245	0.772894	0.893962
TCAF1	cluster_4_2	-0.785887	-0.896506	-0.734036	-0.470962	-0.202037	0.214303
TMA16	cluster_4_2	-0.640006	-0.721292	0.128052	0.221505	0.482375	0.70256
TMEM82	cluster_4_2	-0.533921	-0.506915	0.802733	0.801286	0.913297	0.912369
TRIM21	cluster_4_2	0.786294	0.304176	0.345626	0.440312	0.259644	0.368188
WBP2	cluster_4_2	0.351401	0.0944394	0.449336	0.285318	0.581244	0.516242
WDR48	cluster_4_2	0.942924	0.870265	0.841589	0.680691	0.498605	0.517872
WSB1	cluster_4_2	0.800715	0.793043	0.787713	0.570076	0.830728	0.566423
ACP7	cluster_4_1	-0.514473	-0.565834	0.893265	0.971768	-0.240111	-0.256051
ADAT2	cluster_4_1	0.99197	0.928736	0.863374	0.955593	0.952863	0.888096
AIDA	cluster_4_1	-0.115156	-0.747789	0.690135	-0.289471	-0.864436	-0.737036
ALPP	cluster_4_1	-0.581579	-0.581579	-0.367003	-0.367003	0.7575	0.7575
ANP32C	cluster_4_1	0.401584	0.176091	-0.172567	-0.177817	0.515385	0.532776
ASXL2	cluster_4_1	-0.150618	-0.193317	0.690868	0.711802	-0.0840738	-0.0605156
ATP8B5P	cluster_4_1	0.776619	0.845194	0.912764	0.811116	0.910991	0.736753
BBX	cluster_4_1	-0.395929	-0.302609	-0.712637	-0.549193	-0.281234	0.00234792
BCL2L11	cluster_4_1	0.147116	-0.0328662	0.611766	0.538434	0.242802	0.101874
BCORP1	cluster_4_1	0.507909	0.531874	0.184633	0.240975	-0.189433	-0.337442
CAND1	cluster_4_1	0.12965	0.0555603	0.896824	0.897461	0.800827	0.862554
CCHCR1	cluster_4_1	0.799835	0.800813	0.584743	0.644036	0.708364	0.695884
CEPT1	cluster_4_1	-0.420485	-0.504815	0.370195	0.49506	-0.0162507	0.0806655
CHSY3	cluster_4_1	-0.325251	-0.347132	0.398808	0.478045	0.67587	0.694176
COQ10B	cluster_4_1	-0.0358534	0.264511	-0.463866	-0.365565	-0.145319	0.0263626
CORO1C	cluster_4_1	-0.782504	-0.758022	-0.781991	-0.746958	-0.888508	-0.730764
CSNK1G2	cluster_4_1	-0.180962	0.800595	0.805739	0.757796	0.683326	0.905353
DDX11	cluster_4_1	0.0997537	0.0127013	0.215474	0.178524	0.595912	0.618204
DPYSL4	cluster_4_1	0.847624	0.625419	0.478087	0.228107	0.873757	0.928803
EVPL	cluster_4_1	0.0975981	-0.0534573	0.422146	0.356408	0.772604	0.750346
FAM131C	cluster_4_1	0.231885	0.239909	0.23512	0.291329	0.550044	0.586731
FAM21C	cluster_4_1	0.592236	0.669265	0.336399	0.494451	0.647178	0.832815
FBXW4	cluster_4_1	0.643561	0.598328	0.432727	0.482988	0.854598	0.884512
FTHL17	cluster_4_1	0.852066	0.864031	0.864202	0.90626	0.256574	0.706543
HNRNPH2	cluster_4_1	0.771193	0.847229	0.375625	0.371288	0.820033	0.805585
IQCJ-SCHIP1	cluster_4_1	-0.775605	-0.719435	0.549806	0.582231	0.355822	0.402174
ITSN2	cluster_4_1	0.49663	0.551076	0.832795	0.847871	0.335162	0.555053
KIF21A	cluster_4_1	-0.814062	-0.882557	0.0203335	-0.175104	0.704516	0.53716
LHB	cluster_4_1	-0.113348	-0.0422656	0.587261	0.875387	0.580421	0.655355
LINC01126	cluster_4_1	0.49646	0.501115	-0.141059	-0.069724	0.365404	0.707892
LOC100128851	cluster_4_1	-0.31681	0.0722518	0.299467	0.27463	0.250486	0.238156
LRIF1	cluster_4_1	0.791599	0.810426	0.879959	0.9252	0.835217	0.857525
MCM3AP-AS1	cluster_4_1	-0.266593	-0.0362571	-0.166617	-0.0272329	0.300213	0.278036
MYH14	cluster_4_1	0.291636	0.162879	0.887849	0.880957	0.0408238	0.601731
NAPA	cluster_4_1	0.475656	0.439247	-0.398673	-0.480914	0.707698	0.675657
NBPF3	cluster_4_1	0.381518	0.531613	0.456416	0.827317	0.730054	0.73486
ND1	cluster_4_1	-0.0645229	-0.413067	0.682302	0.201662	0.0735984	0.0684386
NUTF2	cluster_4_1	-0.47002	-0.401685	0.457839	0.417465	-0.0316937	-0.323294
PCDHA5	cluster_4_1	0.560024	0.215991	0.0329357	0.0835352	0.475006	0.200238
PCDHB13	cluster_4_1	0.149199	-0.127941	0.437625	0.353652	0.711509	0.621355
PLIN5	cluster_4_1	-0.0353793	-0.0818801	0.427444	0.448705	0.781942	0.718631
PNISR	cluster_4_1	-0.675032	-0.595405	0.927329	0.798032	0.744468	0.716742
PPIB	cluster_4_1	-0.526216	-0.699043	0.184743	0.0251759	0.189097	0.283193
PPM1K	cluster_4_1	0.766561	0.889314	0.431006	0.473081	0.0746615	0.327585
PSMB8	cluster_4_1	-0.141204	-0.186322	-0.259577	-0.0730206	0.388819	0.411879
PTBP1	cluster_4_1	0.0708213	-0.402491	-0.508932	-0.22053	0.766616	0.752205
RAC2	cluster_4_1	0.275243	0.348549	0.810833	0.807834	0.0945066	0.33266
RBMY1B	cluster_4_1	-0.0103501	-0.159277	-0.00683929	-0.135888	-0.964745	-0.923645
REXO1L1P	cluster_4_1	0.241189	-0.438221	0.748867	0.748842	-0.598681	0.256228
SEPT7P9	cluster_4_1	-0.124942	-0.108801	0.434899	0.399697	0.560173	0.594961
SMIM10L2A	cluster_4_1	-0.250362	-0.0436989	0.230842	0.108797	0.119859	0.0263377
SND1-IT1	cluster_4_1	-0.152138	-0.241791	0.480071	0.539302	0.855409	0.548292
SP140L	cluster_4_1	-0.549779	-0.682237	0.945529	0.872451	0.921128	0.806997
SPTLC2	cluster_4_1	-0.26312	-0.24128	0.358853	0.522527	0.727939	0.740122
STAG1	cluster_4_1	0.497927	0.449889	0.833432	0.806191	0.829355	0.78309
SUMO1P3	cluster_4_1	0.415838	0.450191	0.833283	0.856008	0.835479	0.830388
TBC1D17	cluster_4_1	-0.556578	-0.571151	0.278177	0.197959	0.494324	0.443669
TDRD1	cluster_4_1	0.413273	0.11091	0.656497	0.620403	0.893719	0.816338
TOMM20L	cluster_4_1	0.7756	0.615285	0.82485	0.696353	0.107863	-0.385877
TRA2A	cluster_4_1	-0.674554	-0.626547	0.227203	0.128934	0.781472	0.878183
TRIM38	cluster_4_1	0.667397	0.593774	0.671039	0.648354	0.641778	0.769213
TTLL4	cluster_4_1	0.720413	0.728412	0.65767	0.72604	0.955738	0.975473
UBE2G2	cluster_4_1	0.627477	0.67617	0.0373734	0.0911759	0.663244	0.713981
URM1	cluster_4_1	-0.0433815	0.267753	0.681102	0.50476	0.958292	0.899635
VBP1	cluster_4_1	0.662373	0.687733	0.865916	0.922121	0.660469	0.674292
ZNF254	cluster_4_1	-0.534861	-0.373428	0.567093	0.43745	-0.0164726	-0.0990246
ZNF418	cluster_4_1	0.43396	0.286286	0.956149	0.953593	0.84538	0.893298
ZNF429	cluster_4_1	0.1028	-0.00683104	0.799186	0.785519	0.123431	0.0540752
ZNF675	cluster_4_1	-0.528992	-0.358759	0.841368	0.631412	0.70985	0.319437
ZNF709	cluster_4_1	0.216864	0.00319229	0.94151	0.89025	0.626421	0.708753
ZNF714	cluster_4_1	0.589981	0.504491	0.924761	0.694237	0.532454	0.199471
ZNF727	cluster_4_1	0.559691	-0.2642	0.657718	0.313931	0.442678	0.210346
ZNF738	cluster_4_1	0.566708	0.488806	0.856881	0.820684	0.132245	-0.00330641
CASP8	cluster_3_3	0.678625	0.565571	0.0711932	0.640297	0.577789	0.673075
CDK2	cluster_3_3	0.964716	0.964966	0.674233	0.531702	0.396644	0.401835
DDX3X	cluster_3_3	0.785674	0.713529	0.212826	0.338337	0.762817	0.828239
LOC100131541	cluster_3_3	-0.588496	-0.740627	-0.0916606	0.26593	-0.0398713	0.76317
MFSD14B	cluster_3_3	0.786478	0.786864	0.740775	0.357817	0.928537	0.770314
MORF4L2	cluster_3_3	0.512687	0.228746	0.833601	0.883204	0.630157	0.613534
PJA2	cluster_3_3	0.847132	0.795574	0.507325	-0.0630134	0.879383	0.785881
RBM47	cluster_3_3	0.63926	0.62232	-0.0223273	0.0205832	0.705873	0.74428
THBS1	cluster_3_3	0.641403	0.529974	-0.670276	-0.57693	-0.123209	-0.0613273
TRPM7	cluster_3_3	0.696148	0.62747	0.404804	0.375332	0.689379	0.676705
ACTR1B	cluster_3_2	0.812492	0.740504	0.897717	0.817512	0.857354	0.855213
ADAMTS1	cluster_3_2	0.0551799	0.0819636	0.48645	0.210237	0.904343	0.912652
AKT1S1	cluster_3_2	0.610178	-0.347609	0.116284	-0.228772	0.890986	0.651065
ALDH1A2	cluster_3_2	0.464888	0.455027	0.930115	0.954352	0.852045	0.829363
ANKLE2	cluster_3_2	0.13478	0.139035	0.697275	0.68066	0.891444	0.894612
APH1A	cluster_3_2	-0.462048	-0.257111	-0.453712	-0.573244	0.475172	0.437293
API5	cluster_3_2	0.873091	0.812984	0.594614	0.601623	0.776926	0.795332
ARHGAP35	cluster_3_2	0.633172	0.575245	-0.520468	-0.506025	-0.127744	-0.23531
ARHGEF2	cluster_3_2	0.567206	0.729097	0.362275	0.391488	0.524943	0.412553
ARID4B	cluster_3_2	0.94726	0.937953	0.642002	0.635868	0.780638	0.799974
ARIH1	cluster_3_2	-0.197316	-0.193707	0.185761	0.286685	0.449833	0.512289
ARPC1B	cluster_3_2	0.690789	0.592469	0.966667	0.481714	0.948815	0.731172
ATG9A	cluster_3_2	0.226148	0.191287	-0.538906	-0.0506145	-0.167473	0.624918
ATP11B	cluster_3_2	0.884802	0.849266	0.774796	0.711069	0.880472	0.635048
ATP6V1B2	cluster_3_2	0.687169	0.503642	0.838625	0.754477	0.952709	0.957664
ATPAF1	cluster_3_2	-0.0753063	0.108349	0.64912	0.539869	0.376845	0.201629
AUP1	cluster_3_2	0.613931	0.609607	0.877832	0.834346	0.893429	0.853128
AURKB	cluster_3_2	0.940308	0.931961	0.465034	0.422222	0.658758	0.623777
BAG3	cluster_3_2	-0.489556	-0.342258	0.544474	0.355247	0.293024	0.0206531
BRMS1L	cluster_3_2	-0.167954	-0.203406	0.921127	0.94197	0.900805	0.935539
BTG1	cluster_3_2	0.469637	0.16279	0.732914	0.482063	0.594284	0.611753
C14orf1	cluster_3_2	-0.775446	-0.609977	0.228027	0.611858	0.375292	0.554813
C16orf87	cluster_3_2	0.165649	0.449603	0.596157	0.516865	0.378225	0.337698
C6orf223	cluster_3_2	0.69016	0.916018	-0.21681	0.0271318	0.316461	0.759239
CAPS	cluster_3_2	0.529621	0.829695	-0.0682922	-0.178156	0.852875	0.921648
CDC42BPA	cluster_3_2	0.660251	0.77107	0.87715	0.785239	0.879348	0.865719
CDIPT	cluster_3_2	0.865277	-0.289119	0.0347662	-0.0168639	0.631535	0.0492866
CDR2	cluster_3_2	0.313896	0.345132	0.76573	0.705841	0.940647	0.880276
CERK	cluster_3_2	0.237084	0.204115	0.196414	0.225207	0.653595	0.551922
CHST14	cluster_3_2	0.643135	-0.79735	0.320742	0.303037	0.874549	0.545587
CIRBP	cluster_3_2	-0.530972	-0.713906	0.935862	0.937962	0.888033	0.83852
CLDN7	cluster_3_2	0.77684	0.651869	0.519227	0.560579	0.448691	0.669791
CLUH	cluster_3_2	0.0133539	-0.171502	-0.18653	-0.101307	0.524134	0.385025
CNOT11	cluster_3_2	0.517333	0.488298	-0.710142	-0.699672	0.875191	0.929922
COMT	cluster_3_2	0.212037	0.234293	-0.412435	-0.116534	0.971143	0.80895
COPE	cluster_3_2	-0.353538	0.541671	-0.545647	-0.402193	0.83605	0.303392
COPS8	cluster_3_2	-0.276913	-0.62424	0.881264	0.672539	0.916522	0.233794
CPNE2	cluster_3_2	0.299517	0.0969439	0.613417	0.54164	0.85992	0.935
CRIP2	cluster_3_2	0.859427	0.830065	0.432365	0.174353	0.895926	0.926395
CRLF3	cluster_3_2	-0.26859	-0.192662	0.641813	-0.0190754	0.331722	-0.0153121
CROT	cluster_3_2	0.828197	0.788394	-0.161113	-0.147361	0.251532	0.205114
CXorf40B	cluster_3_2	0.258071	-0.50227	-0.796258	0.0466711	0.778195	0.678563
CYTH2	cluster_3_2	0.744023	0.744149	-0.513805	-0.474442	0.792825	0.6679
DBNDD1	cluster_3_2	0.447552	0.477264	-0.494074	0.281529	0.118795	-0.293259
DCAF8	cluster_3_2	-0.11759	0.112737	0.898557	0.912905	0.952403	0.849781
DHRS11	cluster_3_2	-0.205156	-0.122829	-0.623318	0.743409	-0.876539	0.513863
DPH6	cluster_3_2	0.0623108	-0.231982	0.655992	-0.426605	0.708843	-0.3944
DTX2	cluster_3_2	-0.0664927	-0.0701069	0.313623	0.307036	0.630785	0.635426
DVL3	cluster_3_2	0.540012	0.619117	0.207826	0.0947981	0.43938	0.333134
EFNB2	cluster_3_2	-0.12935	-0.010174	0.806423	0.879142	0.874672	0.859362
EHBP1L1	cluster_3_2	0.241942	0.0170436	-0.0168274	0.208331	0.723213	0.868776
EIF3G	cluster_3_2	0.265855	0.352952	0.270108	0.293107	0.609796	0.653177
ELOVL1	cluster_3_2	0.56136	-0.706197	0.549854	0.477047	0.757146	0.65582
EML3	cluster_3_2	0.247559	-0.0872357	0.55972	0.545577	0.694358	0.671554
EPHB2	cluster_3_2	-0.307284	-0.291469	-0.0707782	-0.220718	0.329144	0.163446
ERGIC3	cluster_3_2	0.857893	0.825756	0.916973	0.856528	0.898534	0.934958
ERLIN1	cluster_3_2	-0.0889401	-0.143198	-0.315171	-0.0202784	-0.362067	0.334333
ERLIN2	cluster_3_2	0.820781	0.687145	0.840304	0.803816	0.943159	0.974648
ETF1	cluster_3_2	0.769517	0.742978	0.8776	0.938514	0.915945	0.802651
EXTL2	cluster_3_2	0.559259	0.480804	0.818882	0.724859	0.905557	0.929686
FAM131A	cluster_3_2	-0.128514	-0.120972	0.186306	0.0119168	0.220394	-0.679018
FAM91A1	cluster_3_2	0.221402	0.0951303	-0.155569	0.138796	0.785847	0.830238
FBXO18	cluster_3_2	-0.0688212	-0.492791	0.594258	0.557163	0.881965	0.586515
FMNL2	cluster_3_2	-0.678445	-0.776014	0.698498	0.368343	0.0700113	-0.255878
G6PD	cluster_3_2	-0.479522	-0.213153	0.268764	0.291824	0.828868	0.797195
GLCE	cluster_3_2	0.592464	0.147801	0.872914	0.680155	0.834732	0.819182
GLMN	cluster_3_2	0.705544	0.619645	0.943262	0.927109	0.930162	0.914907
GLO1	cluster_3_2	0.880641	0.937906	0.344211	0.55244	0.954473	0.930105
GLUD2	cluster_3_2	0.155069	0.347438	0.46778	0.533078	0.144709	0.0349635
GNAQ	cluster_3_2	0.893793	0.804064	0.378904	0.465139	-0.666499	-0.752401
GPATCH1	cluster_3_2	0.735717	0.526114	0.695095	0.684642	0.78164	0.81459
GPR160	cluster_3_2	0.663776	-0.21787	0.0899892	-0.447933	0.513742	0.733145
HMGN4	cluster_3_2	0.329392	0.332593	0.64001	0.589472	0.847396	0.838353
HUWE1	cluster_3_2	0.473448	0.620794	0.924344	0.489367	0.864272	0.781487
IL1R1	cluster_3_2	0.663781	-0.505709	-0.757335	-0.584772	-0.448422	0.201771
INO80	cluster_3_2	0.447964	0.511359	-0.0360183	0.16791	0.916616	0.883564
INPPL1	cluster_3_2	-0.0736438	-0.193627	-0.48933	-0.588329	0.704566	0.699225
INTS5	cluster_3_2	0.0481643	0.362603	0.0496971	0.0635086	0.882852	0.861402
IPO7	cluster_3_2	0.315183	0.283971	0.914353	0.883455	0.796084	0.803307
IRAK1	cluster_3_2	0.788142	0.12738	0.795078	0.640235	0.423543	-0.0676174
ITGA3	cluster_3_2	0.200592	0.203867	0.699233	0.813404	0.921166	0.928108
JUP	cluster_3_2	0.170863	0.175065	0.161372	0.122326	0.886279	0.836385
KCTD18	cluster_3_2	0.706848	0.480323	0.770424	-0.02162	0.494102	0.464339
KCTD5	cluster_3_2	-0.18498	-0.0177822	0.158198	0.210793	0.585631	0.382676
KDM2A	cluster_3_2	0.831216	0.731158	-0.182998	-0.444884	0.781784	0.431197
KDSR	cluster_3_2	-0.0789727	-0.152631	0.643602	0.634389	-0.952934	-0.912855
KIF2A	cluster_3_2	0.856766	-0.135624	0.470722	-0.216495	0.739389	-0.208891
KIFC1	cluster_3_2	-0.247424	-0.197804	0.492397	-0.289315	0.897326	0.832902
KIFC3	cluster_3_2	0.195521	0.149857	-0.282831	-0.40561	0.551481	0.527501
KLHL22	cluster_3_2	0.434196	0.819218	0.421984	0.36562	0.796507	0.827295
KRAS	cluster_3_2	-0.308685	-0.336051	-0.229259	-0.246235	-0.563563	-0.607926
LASP1	cluster_3_2	0.610152	0.42174	0.971716	0.970982	0.963289	0.941177
LOC220729	cluster_3_2	0.571606	0.671454	-0.242081	-0.220527	0.833853	0.806129
LOC401357	cluster_3_2	-0.425039	-0.403754	0.613754	0.678947	0.573625	0.50387
LONRF1	cluster_3_2	0.662044	0.782951	0.736693	0.477477	0.745562	0.449843
LPCAT4	cluster_3_2	0.764187	0.473215	0.646226	0.871938	0.560267	0.0620872
LRRC41	cluster_3_2	-0.156856	-0.113717	0.830391	0.814809	0.69779	0.721763
LTBP3	cluster_3_2	0.251677	-0.0361672	0.601239	0.244468	0.97273	0.948039
LUZP1	cluster_3_2	0.601474	0.644783	-0.15142	-0.147045	-0.182701	-0.213425
LUZP6	cluster_3_2	0.671073	0.582712	0.83902	0.842132	0.130557	0.120972
MAD2L1	cluster_3_2	-0.729579	-0.60014	0.818017	0.523093	0.805962	0.299828
MAN1B1	cluster_3_2	0.617111	0.639043	0.633317	0.387755	0.933322	0.907893
MAP4K3	cluster_3_2	0.959956	0.944877	0.871612	0.931178	0.690842	0.654288
MAPK9	cluster_3_2	-0.41414	-0.462093	0.216433	0.191684	-0.0283895	0.015297
MAPKAPK2	cluster_3_2	0.409784	0.223944	0.153079	0.328702	0.75945	0.501635
MAT2A	cluster_3_2	0.724984	0.139447	0.074095	0.059236	0.847617	0.783408
MATR3	cluster_3_2	0.808396	0.766961	0.904912	0.894259	0.521247	0.512112
MCU	cluster_3_2	0.956636	0.921497	0.853175	0.835463	0.719346	0.800747
MED28	cluster_3_2	0.677959	0.64095	0.312212	0.222745	0.51255	0.545471
MKI67	cluster_3_2	0.391363	0.895498	-0.174149	-0.311889	0.0577174	-0.114026
MPDU1	cluster_3_2	0.169621	0.366231	0.285773	-0.0169438	-0.48336	-0.697042
MRPL38	cluster_3_2	0.168256	-0.124213	0.6365	0.303168	0.909636	0.238947
MRPS27	cluster_3_2	-0.236973	-0.362804	0.448918	0.418162	0.683386	0.64546
MSANTD2	cluster_3_2	0.381099	-0.701811	0.547721	-0.201708	0.837943	-0.365229
MSL2	cluster_3_2	-0.108932	0.829309	0.623532	0.567025	0.183293	0.471835
NADK	cluster_3_2	-0.205713	-0.236345	0.0445337	-0.165659	0.855493	0.727075
NCOA5	cluster_3_2	-0.0458782	-0.046412	-0.299966	-0.317446	-0.328052	-0.247323
NECAP1	cluster_3_2	-0.544739	-0.420455	-0.162577	-0.186981	-0.79389	-0.748598
NRBP1	cluster_3_2	0.744634	0.323655	0.331871	0.0899706	0.801298	0.263736
NT5DC2	cluster_3_2	-0.0364377	0.0594401	0.089936	0.459561	0.35858	0.101214
OBSL1	cluster_3_2	-0.133722	0.0541955	-0.793335	-0.865785	-0.863313	-0.858572
OSBPL8	cluster_3_2	-0.00671478	-0.03841	0.702268	0.620329	0.817962	0.70732
PAPOLA	cluster_3_2	0.396396	0.321103	0.875135	0.831435	0.241583	0.205521
PBXIP1	cluster_3_2	0.360737	-0.042452	0.0937354	-0.330712	0.667088	0.743569
PGPEP1	cluster_3_2	0.767278	0.925744	-0.413307	-0.453523	-0.743099	-0.911726
PHB2	cluster_3_2	0.471615	0.775625	0.983592	0.813843	0.963844	0.929155
PHF20L1	cluster_3_2	0.315948	0.252204	-0.70793	-0.651416	-0.174577	-0.174775
PIAS1	cluster_3_2	0.212324	0.306677	0.72287	0.661445	0.201324	0.0844534
PLCB3	cluster_3_2	-0.716719	-0.723567	-0.489877	-0.475169	-0.0370331	0.0499829
PNO1	cluster_3_2	0.612409	0.571602	0.632378	0.650912	0.931323	0.88525
PNRC2	cluster_3_2	0.948088	0.961473	0.761783	0.704981	0.953993	0.957841
PPFIA1	cluster_3_2	-0.75245	-0.489389	0.684375	0.776273	0.83028	0.643795
PPME1	cluster_3_2	-0.201859	-0.0729758	0.708068	0.709925	0.868277	0.880883
PPP5C	cluster_3_2	0.879298	-0.429219	-0.0617768	0.444821	0.959863	0.0687583
PRKACA	cluster_3_2	0.292374	-0.193976	-0.301396	-0.499911	0.24571	0.0314413
PRKAG1	cluster_3_2	0.678463	0.456166	0.750699	-0.388601	0.946066	0.537284
PRKRIR	cluster_3_2	0.573299	0.511432	0.399792	0.436407	0.750589	0.772909
PRMT1	cluster_3_2	-0.0769846	-0.178963	0.261399	0.875109	0.908946	0.559133
PSMG3	cluster_3_2	0.277318	0.200066	0.537665	0.656478	0.711658	0.703548
PTGES2	cluster_3_2	0.374676	0.60599	0.690598	0.730195	0.959032	0.974642
PTK2	cluster_3_2	0.637556	0.710125	0.83975	0.860281	0.860296	0.858262
PUM2	cluster_3_2	0.169933	0.201843	0.261299	-0.071091	0.357544	0.362882
R3HDM4	cluster_3_2	-0.323812	-0.74687	-0.0291582	-0.00425524	0.875052	0.871877
RAB40C	cluster_3_2	0.653326	0.724332	-0.321348	0.60408	0.915083	-0.320426
RAB4B	cluster_3_2	0.28763	0.281882	0.156645	0.173206	0.825925	0.385059
RAB5A	cluster_3_2	0.752889	0.714814	0.762003	0.833677	0.852874	0.599923
RAI14	cluster_3_2	-0.0209836	-0.0416634	0.213912	0.268821	0.529295	0.460036
RBM15B	cluster_3_2	0.8413	0.756934	0.671337	0.662851	0.473185	0.47925
RCC2	cluster_3_2	0.552428	0.57308	0.879277	0.801592	0.859729	0.743172
RCN2	cluster_3_2	0.916477	0.90944	0.620939	0.441844	0.745849	0.809655
RDX	cluster_3_2	0.711923	0.220329	0.926861	0.311054	0.818272	-0.119124
RGL2	cluster_3_2	-0.266974	-0.61158	0.328619	0.613365	0.862128	0.885672
RNASE4	cluster_3_2	0.578476	0.370872	0.502813	0.846446	0.892762	0.61341
RNF169	cluster_3_2	0.475756	0.485117	-0.514425	-0.251286	0.297462	0.150667
SDC4	cluster_3_2	-0.47271	-0.426318	0.899291	0.885107	0.935466	0.90463
SEC61A1	cluster_3_2	0.119506	0.171941	0.33772	0.604733	0.817655	0.771492
SERINC2	cluster_3_2	0.769631	0.514432	0.598341	0.619581	0.893137	0.842873
SHQ1	cluster_3_2	0.597507	0.667439	-0.652886	-0.503074	-0.765269	-0.603476
SIRT2	cluster_3_2	0.825928	0.831994	0.386366	0.158433	-0.194356	0.0918294
SLC2A10	cluster_3_2	0.351753	-0.0742164	0.20164	-0.0251608	-0.307925	-0.353805
SLC35B3	cluster_3_2	0.397017	0.497747	0.43124	-0.091742	0.20792	0.251207
SLC50A1	cluster_3_2	0.612614	0.628695	0.107449	0.53689	0.412282	0.316276
SNAPC3	cluster_3_2	0.224048	0.278709	0.372346	0.6781	0.552388	0.802482
SNORA62	cluster_3_2	0.117236	-0.194365	-0.80621	-0.796526	-0.860809	-0.890658
SNX33	cluster_3_2	-0.585933	-0.653819	-0.705077	-0.714056	0.797501	0.750156
SPIN3	cluster_3_2	0.729422	0.745594	0.415292	0.421918	0.00909848	-0.0955564
STIM2	cluster_3_2	0.802352	0.673827	0.734645	0.514065	0.635396	0.488207
STXBP2	cluster_3_2	0.143387	0.644477	0.415796	0.403501	0.690533	0.885811
SYNJ2	cluster_3_2	0.875357	0.880491	-0.611177	-0.732009	-0.978241	-0.971659
SYTL2	cluster_3_2	0.664378	0.845045	0.876356	0.82885	0.764758	0.786553
TAF15	cluster_3_2	-0.567044	-0.83494	0.127983	0.151887	0.55211	0.559207
TAX1BP3	cluster_3_2	-0.188951	0.168881	0.154195	0.364677	0.213393	0.464266
TAZ	cluster_3_2	0.596744	-0.533347	-0.0965794	0.0813246	0.914142	-0.112602
TBC1D22B	cluster_3_2	0.748484	0.694519	0.870308	0.797625	0.979673	0.884703
TECR	cluster_3_2	0.802139	0.719769	0.561653	0.598003	0.559368	0.502348
TJP2	cluster_3_2	0.788787	0.929911	0.85896	0.936924	0.925141	0.770913
TM9SF1	cluster_3_2	0.646551	0.611812	0.848445	0.743121	0.835052	0.809311
TMUB2	cluster_3_2	-0.0823628	0.337136	-0.13429	-0.182124	0.73508	0.766218
TNKS1BP1	cluster_3_2	0.825259	0.802744	0.465877	0.442755	0.603263	0.541501
TOR4A	cluster_3_2	0.675945	0.775962	0.597538	0.809548	0.829545	0.797065
TPM1	cluster_3_2	0.740082	0.34078	0.692293	0.86973	0.989082	0.971281
TRAPPC11	cluster_3_2	0.474591	0.341189	0.962054	0.957467	0.902296	0.883156
TRPC4AP	cluster_3_2	0.621707	0.531021	0.306852	0.201175	0.87802	0.925502
TTC14	cluster_3_2	-0.0122717	-0.03303	-0.277699	-0.295246	0.688517	0.681952
TUBB	cluster_3_2	-0.116391	-0.0672998	0.301269	0.24018	0.727935	0.677606
TUBG2	cluster_3_2	-0.685694	-0.4156	0.67894	0.719194	0.8446	0.854504
UAP1	cluster_3_2	0.234502	0.201294	0.361668	0.3444	0.886478	0.911088
UBE2E1	cluster_3_2	0.503949	0.20459	-0.0397215	-0.187738	0.338367	0.237793
UNC119	cluster_3_2	0.791376	-0.436247	-0.0467537	-0.829461	0.444044	0.769074
USP21	cluster_3_2	0.112915	0.0180492	0.526445	0.539849	0.370632	0.365056
UTP4	cluster_3_2	0.477292	0.468241	0.445861	0.404374	0.662547	0.645239
VDAC3	cluster_3_2	0.170835	0.146474	0.778145	0.770183	0.88156	0.854836
WBSCR16	cluster_3_2	0.525222	0.385761	0.296062	-0.132403	0.894317	0.645396
WNT7A	cluster_3_2	0.531904	0.762857	0.575292	0.441222	0.921127	0.946722
WRB	cluster_3_2	0.632545	0.537101	0.783982	0.851103	0.675272	0.690391
XPO6	cluster_3_2	0.642542	0.611925	0.778913	0.738581	0.776253	0.736929
ZMAT3	cluster_3_2	-0.0973973	-0.125988	0.0585619	0.210173	0.743364	0.752295
ZNF853	cluster_3_2	0.478354	0.514816	0.0152432	0.0615604	0.961036	0.951627
ABCA2	cluster_3_1	-0.65941	-0.650249	-0.703035	-0.696347	-0.376578	-0.350932
ABHD2	cluster_3_1	0.687695	0.504995	0.598897	0.550286	0.806109	0.829419
ABHD3	cluster_3_1	0.288486	0.0257018	0.834692	0.934993	0.814671	0.86793
ABI2	cluster_3_1	0.454388	-0.18964	0.768903	0.766024	0.867565	0.853875
ACAP2	cluster_3_1	0.785616	-0.431929	0.832614	0.509339	0.937869	0.687179
ACER3	cluster_3_1	-0.882233	-0.904401	0.348808	0.438918	-0.329844	-0.303418
ACIN1	cluster_3_1	-0.47298	-0.464394	-0.646225	-0.595862	0.53486	0.569181
ACLY	cluster_3_1	-0.609988	-0.776988	-0.63339	-0.870538	0.412326	-0.0426866
ACTBL2	cluster_3_1	0.136379	0.220011	-0.569547	0.668676	-0.140237	-0.217978
ACTN1	cluster_3_1	0.760794	-0.166629	0.372592	0.793025	0.81891	0.784995
ACTN4	cluster_3_1	0.801521	0.551071	0.784088	0.587879	0.937557	0.889474
ADSS	cluster_3_1	0.83473	0.9112	0.90527	0.91035	0.86657	0.833474
AGK	cluster_3_1	0.737563	0.619112	0.0934579	0.210189	0.647722	0.646842
AKAP10	cluster_3_1	0.716787	0.748673	0.857906	0.836359	0.713532	0.625446
ALCAM	cluster_3_1	0.898686	0.809886	0.60354	0.664063	0.626642	0.66426
ALKBH8	cluster_3_1	0.719131	0.175617	0.238773	0.0964792	0.4528	0.699895
ANKIB1	cluster_3_1	0.45474	0.223769	0.854118	0.898313	0.91695	0.825791
ANLN	cluster_3_1	0.940782	-0.586307	0.891438	-0.484093	0.979126	0.445319
ANP32D	cluster_3_1	0.304398	0.313459	-0.457153	-0.595847	0.718415	0.592554
AP1AR	cluster_3_1	0.401611	0.540174	0.754538	0.775981	0.579561	0.550673
APEH	cluster_3_1	0.62645	0.32794	0.778678	0.317678	0.760351	-0.121671
APMAP	cluster_3_1	0.765759	0.7704	0.833651	0.833328	0.936399	0.919939
APPL1	cluster_3_1	-0.517313	-0.546726	-0.455351	-0.641594	0.207781	-0.147981
ARCN1	cluster_3_1	0.435059	0.309636	0.856848	0.880989	0.875282	0.76751
ARF1	cluster_3_1	0.775602	0.551012	0.911367	0.776555	0.918876	0.908103
ARGLU1	cluster_3_1	0.458741	0.316374	-0.306808	-0.555739	0.569726	0.3911
ARHGEF1	cluster_3_1	-0.442493	-0.628179	0.366564	0.166595	-0.40217	-0.474309
ARHGEF28	cluster_3_1	0.175056	0.399566	0.547055	0.570767	0.615001	0.520882
ARSK	cluster_3_1	-0.422679	-0.0863301	0.803677	0.819603	0.710897	0.727013
ASAP1	cluster_3_1	-0.0484099	0.0683976	0.785907	0.737314	0.716287	0.641596
ATG16L1	cluster_3_1	0.377768	0.637767	-0.0440234	0.00039643	0.843572	0.890894
ATP2C1	cluster_3_1	0.761661	0.807712	0.312387	0.264102	0.860661	0.848492
ATXN7L3B	cluster_3_1	0.0745115	0.188924	0.250681	0.719024	0.943327	0.823384
AXIN1	cluster_3_1	0.803505	0.73301	0.197433	0.381863	0.861541	0.898548
B4GALT1	cluster_3_1	0.271968	0.335517	0.646431	-0.169458	0.238725	-0.279801
B4GALT5	cluster_3_1	0.293394	-0.103045	0.938777	0.499897	0.866643	-0.256932
BAP1	cluster_3_1	0.835711	0.827985	-0.0708334	-0.0551682	0.709386	0.674378
BCL2L1	cluster_3_1	0.364692	0.387128	-0.22711	-0.234308	0.356208	0.358158
BCL9	cluster_3_1	0.914681	-0.622107	0.868793	-0.240765	0.964396	-0.533919
BCL9L	cluster_3_1	0.754116	0.716772	-0.256904	-0.271034	0.121004	0.300205
BECN1	cluster_3_1	0.354697	0.00900708	0.863064	0.926035	0.692042	0.692633
BSG	cluster_3_1	0.0333238	0.161882	0.532065	0.41467	0.767298	0.907214
BTBD10	cluster_3_1	-0.575916	-0.303845	0.775336	0.36967	0.909634	0.873681
C1orf115	cluster_3_1	0.497726	0.513737	0.44749	0.377264	0.671082	0.66942
C5orf22	cluster_3_1	0.516673	0.0970943	0.78698	0.788775	0.908268	0.736062
CAB39	cluster_3_1	0.948868	-0.453154	0.852848	0.172434	0.770554	0.795397
CALU	cluster_3_1	-0.136151	0.181849	0.100929	-0.0394422	0.349322	0.219637
CAMK2N1	cluster_3_1	-0.363211	-0.339095	0.608412	0.772691	0.857186	0.859379
CANT1	cluster_3_1	0.922038	0.427876	0.766142	0.493661	0.942087	0.69318
CASC3	cluster_3_1	0.0536402	0.0222135	0.326069	0.0452181	0.794425	0.639987
CAV2	cluster_3_1	0.730445	0.7481	0.928895	0.900639	0.836064	0.842084
CCDC117	cluster_3_1	-0.872844	-0.853682	0.595551	0.623089	0.63533	0.674228
CCND1	cluster_3_1	0.16908	0.104094	0.106382	0.187361	0.515363	0.516955
CCNG1	cluster_3_1	0.758724	0.690893	0.965076	0.921789	0.661143	0.774902
CCNG2	cluster_3_1	0.0884468	-0.208292	0.637204	-0.519732	-0.495186	-0.8588
CCNK	cluster_3_1	0.864444	0.797013	0.814008	0.665412	0.891324	0.791924
CCNY	cluster_3_1	-0.11561	-0.138848	0.235627	0.233362	0.745666	0.664776
CD74	cluster_3_1	-0.833794	-0.806544	0.25076	0.182469	-0.0027367	0.0402574
CD9	cluster_3_1	-0.535155	-0.627361	0.628203	0.756212	0.622176	0.676679
CD99	cluster_3_1	-0.179934	-0.410147	0.84682	0.675077	0.962131	0.889001
CDC37	cluster_3_1	0.409566	0.285497	0.785623	0.901848	0.954661	0.173394
CDKAL1	cluster_3_1	0.487399	0.841535	0.0743292	0.185366	-0.301615	-0.0150544
CDYL	cluster_3_1	0.830847	0.775012	0.786888	0.712125	0.922216	0.895065
CEP85	cluster_3_1	0.658068	0.398549	-0.195259	-0.156184	0.737265	0.592317
CHD1	cluster_3_1	0.90494	0.766834	-0.464367	-0.29874	0.583141	0.505275
CHD4	cluster_3_1	0.459265	0.376123	0.583508	0.632992	0.881628	0.889378
CHPF2	cluster_3_1	0.253351	0.0118547	-0.564474	-0.515288	0.654518	0.392052
CLINT1	cluster_3_1	0.258275	-0.0379194	0.415859	0.583053	0.445067	0.467467
CLPTM1	cluster_3_1	-0.280892	-0.340576	-0.254477	-0.131262	0.558738	0.622015
CNTRL	cluster_3_1	-0.166907	-0.24272	-0.164499	-0.023705	-0.077329	-0.052096
COLGALT1	cluster_3_1	0.731227	0.657189	0.497469	0.421938	0.947145	0.796001
COMMD2	cluster_3_1	0.258959	0.389456	0.84737	-0.0488732	0.909988	-0.573692
COPG1	cluster_3_1	0.0868153	0.03869	-0.21253	-0.460414	0.931984	0.800097
COPS7B	cluster_3_1	-0.35861	0.0643154	0.426272	0.332132	0.96196	-0.51511
CRK	cluster_3_1	0.632465	0.680576	0.541975	0.522733	0.936793	0.931017
CTGF	cluster_3_1	0.191015	0.247177	-0.179475	0.00270504	0.115024	0.330807
CTSD	cluster_3_1	0.632732	0.271311	0.706719	0.256248	0.825517	0.783214
CXADR	cluster_3_1	0.649549	0.608094	0.596852	0.591648	0.396524	0.598627
DAPK1	cluster_3_1	0.631923	0.63638	0.22269	0.30099	0.714786	0.712356
DBF4	cluster_3_1	0.0292936	-0.678639	-0.133595	0.730479	-0.582153	0.391603
DBNL	cluster_3_1	0.572695	0.50769	-0.838725	-0.800693	-0.784273	-0.772547
DBR1	cluster_3_1	0.780193	0.78347	0.784799	0.769599	0.948613	0.886349
DCAF12	cluster_3_1	-0.109777	-0.219454	0.842863	0.920567	0.598978	0.760562
DCTD	cluster_3_1	0.782593	0.789796	0.91188	0.852579	0.918571	0.919654
DDOST	cluster_3_1	0.665486	0.813516	0.809198	0.735116	0.875404	0.715129
DDX39B	cluster_3_1	0.341999	0.436769	0.905561	0.837867	0.960053	0.502519
DEPDC1	cluster_3_1	0.267186	-0.518255	0.605941	0.537569	0.58015	0.411948
DERL1	cluster_3_1	0.44465	-0.601325	0.417863	-0.86716	0.84011	-0.500295
DHX40	cluster_3_1	-0.125038	-0.204141	0.668032	0.684775	0.504071	0.496444
DLG1	cluster_3_1	0.721954	-0.132832	-0.283012	-0.653871	0.285087	-0.191905
DNA2	cluster_3_1	0.891409	0.882362	0.235539	0.278554	0.719854	0.803647
DNAJB14	cluster_3_1	0.0323539	-0.186738	0.618543	0.576841	0.938085	0.933361
DNM2	cluster_3_1	-0.155366	-0.169517	0.5833	0.504075	0.930682	0.921707
DPY19L1P1	cluster_3_1	0.637331	0.601029	0.370503	0.299481	0.704955	0.665372
DPYSL2	cluster_3_1	0.862716	0.817051	0.679261	0.731369	0.845678	0.852019
DST	cluster_3_1	0.116854	0.342883	0.636867	0.692847	0.876194	0.947447
DUSP3	cluster_3_1	-0.269853	-0.477544	0.886259	0.61374	0.577606	0.457205
DUSP5	cluster_3_1	-0.104317	-0.149204	-0.759063	-0.783935	0.783425	0.721167
DYNC1LI2	cluster_3_1	0.258238	0.434143	0.973126	0.878577	0.890267	0.892918
ECE1	cluster_3_1	0.289385	0.723671	-0.086701	-0.13564	0.884448	0.774726
EDEM1	cluster_3_1	0.851546	0.723081	0.815647	0.925739	0.932839	0.870947
EEF2	cluster_3_1	-0.609342	-0.318346	0.73252	0.456017	0.770926	0.844074
EGLN2	cluster_3_1	0.596112	0.0137255	0.768695	0.296959	0.850973	0.799865
EHBP1	cluster_3_1	0.140088	0.154775	0.932204	0.902327	0.971474	0.968759
EI24	cluster_3_1	0.690325	-0.797688	0.956401	-0.357207	0.959575	0.852153
EIF4G1	cluster_3_1	0.643443	-0.30621	0.394036	0.702191	0.702174	-0.082041
EIF5A	cluster_3_1	0.792408	0.59277	0.770763	0.562059	0.599105	0.714155
ELAVL1	cluster_3_1	0.850966	0.863302	0.71155	0.724035	0.764694	0.726246
ENSA	cluster_3_1	0.777689	0.529276	0.3653	-0.0971771	0.286711	0.367501
EPB41L2	cluster_3_1	0.609194	0.567917	0.27052	0.848553	0.769414	0.891331
EPS8	cluster_3_1	0.969065	0.959371	0.963349	0.948296	0.873486	0.850719
ERMP1	cluster_3_1	0.696538	0.718983	0.399622	-0.00486061	0.49393	0.816721
ESRP1	cluster_3_1	0.567566	0.580076	0.577434	0.378476	0.857272	0.685952
ESYT1	cluster_3_1	0.527757	0.507577	0.605535	0.425428	0.917486	0.920604
EXD2	cluster_3_1	0.776865	0.801941	0.626666	0.284848	0.147507	0.220223
EXOC6B	cluster_3_1	0.600476	0.640656	-0.234953	-0.10412	-0.666865	-0.63982
EXOSC6	cluster_3_1	-0.0429934	-0.0490521	0.120844	0.188018	0.486264	0.482191
FADS3	cluster_3_1	0.695942	0.564204	0.367809	0.31881	0.681268	0.828394
FAM135A	cluster_3_1	0.232148	0.241996	0.822973	0.901878	0.849561	0.832047
FAM168B	cluster_3_1	0.652673	0.180528	-0.699478	-0.47877	0.934051	0.91839
FAM193B	cluster_3_1	0.159254	0.101006	0.93118	0.739671	0.928132	0.920055
FAM3C	cluster_3_1	0.232074	0.180233	0.807229	0.746542	0.935384	0.954487
FAM72A	cluster_3_1	-0.268276	-0.564806	0.586347	-0.550917	0.897298	0.491515
FAM72D	cluster_3_1	-0.367911	-0.48398	0.788928	0.47775	0.768999	0.503849
FAR1	cluster_3_1	-0.861657	-0.706708	0.737584	0.954225	0.790981	0.963623
FAT1	cluster_3_1	0.725104	0.535965	0.0413365	-0.145498	0.862208	0.844034
FAT4	cluster_3_1	-0.0266255	0.571159	0.823003	-0.508689	0.487298	-0.313061
FBXO3	cluster_3_1	0.864653	0.679527	-0.405436	0.867945	-0.00554135	0.133278
FEM1A	cluster_3_1	-0.719459	-0.774464	0.0962223	0.0992899	0.286361	0.182614
FGFR4	cluster_3_1	0.316655	0.664753	-0.0348923	-0.458957	0.941043	0.646488
FGFRL1	cluster_3_1	-0.213592	0.668291	0.824149	-0.179385	0.986943	0.221743
FIGNL1	cluster_3_1	-0.777536	-0.728453	-0.178542	0.426418	0.64496	0.747984
FOXRED1	cluster_3_1	0.95483	0.0443863	-0.17214	0.415757	0.525596	-0.397372
FRYL	cluster_3_1	0.214366	-0.194272	0.828235	0.739819	0.595435	0.788697
FUBP3	cluster_3_1	0.345032	0.391845	0.405249	0.35702	-0.176993	-0.200287
FURIN	cluster_3_1	0.705648	0.732946	0.305827	0.303423	0.779712	0.767349
FUS	cluster_3_1	-0.209229	-0.253726	0.717705	0.759224	0.84611	0.762688
FXYD5	cluster_3_1	0.155463	0.541388	0.851448	0.890737	0.777323	0.368245
GABARAP	cluster_3_1	0.125986	0.00245749	0.933206	0.920247	0.812737	0.683639
GALNT11	cluster_3_1	0.222497	0.663646	0.642213	0.464511	0.837296	0.699246
GALNT12	cluster_3_1	0.709668	0.702592	0.603955	0.598596	0.555559	0.615248
GALNT2	cluster_3_1	0.132285	0.331622	0.416409	0.466655	0.684981	0.726374
GCH1	cluster_3_1	0.527335	0.349819	0.883632	0.269406	0.937792	0.177441
GDI2	cluster_3_1	0.683016	0.754541	0.883388	0.87205	0.937934	0.845734
GEMIN5	cluster_3_1	0.537556	0.516548	0.0724329	0.0817882	0.577644	0.548039
GLE1	cluster_3_1	0.908335	0.83362	0.723342	0.582735	0.784863	0.743928
GLTP	cluster_3_1	0.364033	0.27296	0.698228	0.760405	-0.163664	-0.108248
GLUD1	cluster_3_1	0.532586	-0.868472	-0.658495	-0.00165167	-0.171209	0.479354
GMPPA	cluster_3_1	0.861392	0.150614	0.358303	0.438566	0.852699	0.389429
GNA11	cluster_3_1	-0.00659239	-0.0273982	0.586064	0.649806	0.587741	0.494674
GNB1	cluster_3_1	-0.0208333	-0.433863	0.85989	0.874126	0.915776	0.98238
GNB2	cluster_3_1	-0.236643	0.116635	0.717507	0.617405	0.580568	0.542694
GOLGA8T	cluster_3_1	-0.31569	0.0876742	0.890066	0.667166	0.959	0.859776
GOLPH3	cluster_3_1	0.88255	-0.309907	0.862862	0.382913	0.412127	0.418186
GPRC5A	cluster_3_1	-0.523889	-0.394357	0.682528	0.836282	0.892798	0.379797
GRAMD1A	cluster_3_1	0.179646	-0.0957865	-0.384924	0.0486224	0.23348	0.221401
GRINA	cluster_3_1	0.652756	0.75468	0.748612	0.72753	0.892658	0.915076
GTF3C1	cluster_3_1	0.256097	-0.0999035	-0.643104	-0.444868	0.581439	0.284042
H1FX	cluster_3_1	0.86646	0.432288	-0.6245	-0.742878	0.573763	0.39442
HIBADH	cluster_3_1	0.48612	-0.270354	0.519523	0.0673233	0.715356	0.487936
HIST1H4L	cluster_3_1	-0.482533	-0.840823	-0.0528829	-0.191316	-0.123441	0.305468
HMCES	cluster_3_1	-0.0594862	-0.0763551	0.0440335	-0.112608	0.451196	0.334097
HPCAL1	cluster_3_1	0.111921	0.548428	0.809891	-0.120672	0.931067	0.812765
IDH3A	cluster_3_1	0.495915	0.489809	0.106408	0.450633	0.478753	0.751712
IGF2R	cluster_3_1	0.887473	0.641785	0.845276	0.664175	0.917527	0.942685
IGFBP3	cluster_3_1	-0.670376	-0.719178	0.207194	0.274076	0.790964	0.737103
IGFBP4	cluster_3_1	0.621288	0.0106188	0.34245	0.510691	0.92185	0.916122
IST1	cluster_3_1	0.713915	0.652956	0.810545	0.640749	0.915784	0.870149
KAT6B	cluster_3_1	-0.578383	-0.686928	-0.454867	-0.26819	-0.566561	-0.416731
KCTD14	cluster_3_1	0.339702	0.0788004	0.19699	0.565941	0.875115	0.709195
KDELR1	cluster_3_1	0.756693	0.481511	0.828955	0.730018	0.732212	0.763017
KDM1B	cluster_3_1	-0.175561	-0.106111	0.438817	0.526143	0.56471	0.598547
KDM2B	cluster_3_1	0.533403	0.570654	0.427158	0.352069	0.249694	0.219094
KIAA0319L	cluster_3_1	0.620303	0.840494	0.505426	0.294663	0.859227	0.896478
KIAA0930	cluster_3_1	0.451666	0.297647	0.825102	0.176649	0.880193	0.551324
KLHDC3	cluster_3_1	0.835126	0.41049	0.428837	0.615442	0.766826	0.816798
KXD1	cluster_3_1	0.317758	0.446506	0.329497	0.0833661	0.887288	0.904826
L1CAM	cluster_3_1	-0.25102	-0.488643	-0.259476	-0.123376	-0.599855	-0.151238
LBH	cluster_3_1	-0.510435	-0.393326	0.0541378	0.0585679	0.0567802	-0.23088
LGMN	cluster_3_1	-0.772216	-0.2105	0.210882	0.8755	0.851013	0.609242
LMAN2	cluster_3_1	0.230365	-0.0973278	-0.325031	-0.490359	0.480897	0.335461
LOC100133050	cluster_3_1	-0.607496	-0.469139	0.660507	0.795627	0.803891	0.883265
LOC100190986	cluster_3_1	-0.546729	-0.303498	0.0265604	0.24432	0.427311	0.242491
LOC148709	cluster_3_1	-0.176775	-0.495571	0.674856	0.499702	0.866592	0.678915
LOC441455	cluster_3_1	0.509449	0.455775	0.910312	-0.473404	-0.0158735	-0.498845
LRCH1	cluster_3_1	0.788292	0.702658	0.280011	0.301318	-0.182485	-0.2601
LRP10	cluster_3_1	0.168747	0.072289	-0.369366	-0.169352	0.844892	0.860839
LRP11	cluster_3_1	0.126159	0.33694	-0.033561	-0.267132	0.76921	0.668987
LRP12	cluster_3_1	0.0562694	0.059234	0.590231	0.578011	0.983071	0.981622
LRRC58	cluster_3_1	0.196668	0.696386	0.778591	0.0334467	0.864559	-0.422427
LSM4	cluster_3_1	0.343012	0.177974	-0.12935	0.0341631	0.960464	0.975177
LTN1	cluster_3_1	0.184717	0.325891	0.767519	0.780084	0.925445	0.91311
LY6E	cluster_3_1	-0.356608	-0.793148	0.18157	0.364503	0.532683	0.75378
M6PR	cluster_3_1	0.588044	-0.0850178	0.93833	0.6115	0.897672	0.366305
MAGED2	cluster_3_1	0.230844	0.823723	0.914627	0.90351	0.928056	0.891719
MAN2C1	cluster_3_1	0.800172	0.758559	0.476051	0.424767	0.94132	0.93935
MANSC1	cluster_3_1	0.67433	0.626534	0.00759825	0.0494246	0.905777	0.908027
MARCH7	cluster_3_1	0.865727	0.100993	0.847953	0.564695	-0.125396	-0.0848705
MATN3	cluster_3_1	0.0693207	0.380326	0.79098	0.602087	0.685953	0.617178
MED23	cluster_3_1	0.724926	0.701006	0.0684465	0.198955	0.127329	0.506239
METTL14	cluster_3_1	0.795065	0.848744	0.676847	0.69425	0.486687	0.502291
MFHAS1	cluster_3_1	0.921786	0.949635	0.380303	0.802484	0.848995	0.150156
MFSD9	cluster_3_1	-0.362474	-0.353703	-0.241418	-0.506794	0.474107	0.635461
MICALL1	cluster_3_1	0.750781	0.758021	-0.441553	-0.506022	0.785949	0.771494
MIF4GD	cluster_3_1	0.366025	0.867544	0.916714	0.879216	0.926374	0.866216
MINK1	cluster_3_1	0.0750402	0.190926	0.482288	0.0751114	0.773569	-0.109928
MINPP1	cluster_3_1	0.68776	0.481634	0.955618	0.98182	0.923778	0.905092
MKRN7P	cluster_3_1	0.897119	0.899078	0.586769	0.581792	0.144127	0.109159
MOV10	cluster_3_1	0.289701	-0.464104	0.452286	0.37414	0.895988	0.8875
MRPS18A	cluster_3_1	0.106441	0.0778018	-0.130203	-0.112201	0.851868	0.847076
MSMO1	cluster_3_1	0.675815	0.427335	0.730523	0.667398	0.468919	0.390763
MTM1	cluster_3_1	0.894917	0.89465	0.915081	0.966017	0.769734	0.837424
MTPN	cluster_3_1	0.539942	-0.189338	0.517546	0.200983	0.894364	0.502261
MYL9	cluster_3_1	0.361171	0.2458	0.89156	0.783872	0.913104	0.754725
NAA40	cluster_3_1	0.183481	0.177263	-0.556215	-0.684221	0.353866	-0.607363
NAF1	cluster_3_1	0.74984	0.681493	-0.0060077	0.275473	0.759923	0.61369
NBN	cluster_3_1	0.424414	0.392342	0.334358	-0.0586813	0.930454	0.912387
NBPF10	cluster_3_1	0.0772085	-0.195899	0.716605	0.208105	0.0972388	0.0277903
NEDD9	cluster_3_1	0.620729	0.661073	-0.130841	-0.136792	0.462278	0.427539
NEK1	cluster_3_1	0.936814	0.912275	0.945867	0.930822	0.765349	0.810207
NEK2	cluster_3_1	-0.126324	0.314212	0.7645	0.68715	0.750895	0.915569
NEK7	cluster_3_1	0.685962	0.758027	-0.372692	-0.486424	0.038179	-0.191397
NFATC2IP	cluster_3_1	0.782056	0.849414	0.858273	0.879449	0.798654	0.488842
NFKBIZ	cluster_3_1	0.599924	0.600768	0.500747	0.455789	0.84709	0.84128
NMD3	cluster_3_1	0.314612	0.779793	0.671461	0.818666	-0.0244266	0.154259
NMUR2	cluster_3_1	0.212211	0.438475	0.474878	0.430296	0.380407	0.000228723
NPEPPS	cluster_3_1	0.860591	0.685793	0.788648	0.720907	0.8605	0.886721
NPTN	cluster_3_1	0.725058	-0.327385	0.921276	0.376932	0.868383	0.753887
NRBF2	cluster_3_1	0.527167	0.178122	0.292611	0.706485	0.111916	-0.0532864
NSMCE3	cluster_3_1	0.442426	0.537089	0.597671	0.556286	0.666818	0.671957
NUCB1	cluster_3_1	0.0191078	-0.411966	-0.174516	-0.135909	0.654372	0.694284
NUDT15	cluster_3_1	0.748257	0.81661	0.481117	0.592829	0.836121	0.839151
NUDT19	cluster_3_1	-0.237994	-0.327188	0.337096	0.347846	0.0852984	0.168494
NUMA1	cluster_3_1	0.728678	0.248442	-0.127762	-0.284236	0.806258	0.0763137
NUP210	cluster_3_1	0.936771	0.916413	0.339975	0.380036	0.858213	0.818627
OPN3	cluster_3_1	0.0445929	-0.235745	0.157404	0.204741	-0.47644	-0.448512
PACSIN2	cluster_3_1	0.75956	-0.0281736	-0.172845	0.11832	0.146062	0.295924
PDIA6	cluster_3_1	0.207336	0.311514	-0.059261	-0.116114	0.932421	0.935351
PEA15	cluster_3_1	0.0912231	0.264311	0.327626	0.473117	0.801036	0.21184
PEF1	cluster_3_1	0.462712	0.701093	0.256188	-0.0221197	0.966472	0.885411
PFKL	cluster_3_1	0.813442	0.809203	0.538864	0.548341	0.263258	0.185867
PFN2	cluster_3_1	0.644871	0.489369	0.504073	-0.619902	0.909396	-0.795078
PGRMC2	cluster_3_1	-0.191709	-0.334998	0.77916	0.808271	0.923505	0.938488
PIGY	cluster_3_1	0.845629	0.507175	0.911606	0.858617	0.964511	0.927427
PIK3AP1	cluster_3_1	-0.680384	-0.722608	0.420781	0.417513	0.394468	0.427168
PIK3CB	cluster_3_1	0.921106	0.787914	0.910453	0.851909	0.900482	0.904492
PIK3R1	cluster_3_1	0.851302	0.514075	0.908859	0.745399	0.547572	0.362758
PITHD1	cluster_3_1	-0.148644	0.292269	0.838519	0.683433	0.895465	0.855321
PKN1	cluster_3_1	0.433351	0.0557637	0.249778	-0.166979	0.738821	0.407726
PKN2	cluster_3_1	0.571311	0.530215	0.700426	0.692699	0.674656	0.744143
POFUT2	cluster_3_1	0.184388	0.0459706	-0.00997651	-0.152728	0.938974	0.940247
POLD2	cluster_3_1	0.893859	0.880191	0.661879	0.604447	0.911514	0.911873
POT1	cluster_3_1	0.821385	0.479644	0.810759	0.503276	0.564042	-0.693211
PPM1A	cluster_3_1	-0.087924	-0.353491	-0.0282314	0.0792734	0.430247	0.693953
PPM1H	cluster_3_1	0.679453	0.409323	0.854466	0.874334	0.845479	0.883671
PPP1R11	cluster_3_1	-0.29858	-0.287191	0.0664573	0.202128	-0.317911	-0.489627
PPP4C	cluster_3_1	0.70056	0.647336	0.372158	0.137988	0.799267	0.802567
PRCC	cluster_3_1	0.279963	0.209717	0.832152	0.495117	0.718632	0.609891
PRDX3	cluster_3_1	0.672776	-0.662088	-0.0753382	-0.292264	0.926084	0.905247
PRKCSH	cluster_3_1	0.920282	0.537321	0.622159	0.604419	0.836167	0.889599
PROSC	cluster_3_1	0.76297	0.74704	0.96259	0.949872	0.555858	0.491182
PRPF4	cluster_3_1	0.830199	0.910029	0.519936	0.539453	-0.2372	-0.352538
PRR16	cluster_3_1	-0.811341	-0.719015	0.258471	0.224886	0.599612	0.523205
PSAP	cluster_3_1	0.3697	0.391087	0.548793	0.480145	0.891748	0.815729
PSENEN	cluster_3_1	-0.749935	-0.689675	0.684959	0.691808	0.762895	0.759659
PSMA3-AS1	cluster_3_1	0.200342	-0.606689	0.766859	0.450943	0.891119	-0.127667
PSMD3	cluster_3_1	0.512055	0.413541	0.611231	0.756154	0.968522	0.975835
PTGES3	cluster_3_1	0.748358	0.712325	0.77373	0.448404	0.929801	-0.236424
PTK7	cluster_3_1	-0.355823	0.631231	0.14242	0.0656666	0.770646	0.474424
PTP4A2	cluster_3_1	0.489314	-0.208623	0.432125	0.349373	0.881553	0.773822
PTPN9	cluster_3_1	0.820411	0.894057	0.813769	0.769928	0.916183	0.660974
PXDC1	cluster_3_1	0.0852778	0.105494	0.572367	0.551484	0.849506	0.850418
RAB29	cluster_3_1	0.476167	0.466791	0.66634	0.694193	0.669546	0.598098
RAB5B	cluster_3_1	0.709412	0.500864	0.841433	0.721062	0.873584	0.891647
RANBP6	cluster_3_1	0.823848	0.630891	0.762597	0.775026	0.731811	0.66627
RAP1BP1	cluster_3_1	-0.00138241	-0.0710863	0.745427	0.331582	0.792715	0.111076
RAP1GAP2	cluster_3_1	0.377724	0.389762	0.642718	0.008653	0.1939	0.33899
RAP2A	cluster_3_1	0.538274	0.697827	0.860353	0.873706	0.692167	0.674515
RARRES1	cluster_3_1	0.713825	-0.481809	0.414942	-0.330732	0.925707	-0.898281
RASA1	cluster_3_1	0.278866	0.106857	0.632995	0.873742	0.508237	0.616489
RBM3	cluster_3_1	-0.22316	-0.413852	0.971913	0.934041	0.7868	0.611376
RDH13	cluster_3_1	-0.318086	-0.329803	0.415587	0.433228	0.541731	0.614344
RFC3	cluster_3_1	-0.755872	0.130974	0.416776	0.490057	-0.599708	-0.531099
RFWD3	cluster_3_1	-0.0579892	-0.16441	0.495595	0.163087	0.0122528	-0.111452
RHOC	cluster_3_1	0.444058	0.474541	0.888074	0.913701	0.956061	0.946214
RIC8A	cluster_3_1	0.419363	0.60655	0.781114	0.695387	0.915313	0.909861
RNF20	cluster_3_1	0.558689	0.734924	0.946564	0.821205	0.879954	0.869339
RNF40	cluster_3_1	0.701985	0.6803	-0.0367885	-0.0196537	0.842797	0.783298
RNF8	cluster_3_1	0.554323	0.559452	0.0349553	-0.284877	0.417321	0.105431
RPL7L1	cluster_3_1	-0.0713464	-0.00374268	0.855562	0.652793	0.664982	0.678972
RPN1	cluster_3_1	0.655526	0.730039	0.635338	0.0816954	0.565605	0.43915
RRM2	cluster_3_1	0.787788	-0.568944	0.80794	0.141977	0.509109	0.760975
RYBP	cluster_3_1	0.751289	0.737278	0.62706	0.542296	0.919816	0.924589
SAMD1	cluster_3_1	0.2829	0.112595	0.842032	0.8257	0.964127	0.958735
SCOC	cluster_3_1	0.814516	0.813669	0.153116	0.193352	0.848879	0.846188
SDF4	cluster_3_1	0.515032	0.439745	0.127846	0.126526	0.607822	0.600695
SEC16A	cluster_3_1	0.905573	0.931569	0.934258	0.894371	0.80259	0.82099
SEC24D	cluster_3_1	0.576393	0.605102	0.905851	0.960305	0.953295	0.960212
SECISBP2L	cluster_3_1	0.519497	-0.0818453	-0.0391283	0.0790164	0.0792354	-0.00958592
SELT	cluster_3_1	-0.73221	-0.419033	-0.598849	-0.412445	-0.855168	-0.681561
SEMA4B	cluster_3_1	0.088222	0.386487	-0.32158	-0.43557	0.44606	0.39902
SEPT6	cluster_3_1	0.370875	0.374102	0.581891	0.37991	0.897651	0.758766
SEPT7	cluster_3_1	0.799532	0.681398	0.946553	0.0657014	0.820374	0.509581
SERPINE2	cluster_3_1	-0.511845	-0.378655	0.638697	0.490191	0.913003	0.849484
SF3B4	cluster_3_1	0.412334	0.521376	0.844862	0.848422	0.807466	0.838586
SGPP1	cluster_3_1	-0.566103	-0.48053	0.651196	0.666587	0.557344	0.792766
SH3BP4	cluster_3_1	0.83918	0.84323	-0.728202	-0.765672	-0.780451	-0.782954
SH3GLB2	cluster_3_1	-0.145131	-0.213015	0.487136	0.4913	0.826399	0.807068
SHKBP1	cluster_3_1	0.638883	0.111822	0.311263	-0.570086	0.968353	0.633232
SHOC2	cluster_3_1	0.705093	0.411655	0.884988	0.194271	0.774295	0.217844
SIAH1	cluster_3_1	0.878363	-0.634721	0.179721	-0.54056	0.767424	0.143251
SIRT7	cluster_3_1	0.55936	0.567244	0.792378	0.781799	0.979042	0.976499
SLC15A4	cluster_3_1	0.652006	0.0440726	0.602898	0.502057	0.574429	0.357018
SLC1A5	cluster_3_1	0.873605	0.810406	0.441175	0.29254	0.859939	0.823587
SLC25A17	cluster_3_1	0.765028	0.00280889	0.203081	0.268618	0.363531	0.267904
SLC30A7	cluster_3_1	-0.0592275	-0.860085	0.732267	-0.17362	0.917546	0.853218
SLC35A5	cluster_3_1	0.641536	0.379341	0.885462	0.851506	0.706371	0.698332
SLC35G1	cluster_3_1	-0.0410124	-0.0857677	0.84117	0.760536	0.75299	0.795959
SLC39A1	cluster_3_1	0.260262	0.870214	0.656071	0.293865	0.849903	0.925587
SLC39A6	cluster_3_1	-0.111093	-0.191902	0.923681	0.904744	0.80399	0.77988
SLC39A7	cluster_3_1	-0.486093	-0.211943	0.625732	0.56783	0.821553	0.634778
SLC3A2	cluster_3_1	0.243196	-0.224122	0.835763	0.803949	0.956347	0.957451
SLC44A4	cluster_3_1	0.566758	0.610641	0.847844	0.830569	0.846638	0.77968
SLC4A2	cluster_3_1	0.843914	0.838083	0.154158	0.184061	0.821403	0.81484
SLC7A5	cluster_3_1	0.856879	0.894417	0.649945	0.565076	0.720346	0.711134
SMARCD2	cluster_3_1	0.876932	0.923558	0.264577	-0.0686154	0.734023	0.614925
SMS	cluster_3_1	0.805732	0.817893	0.32962	0.398113	0.887896	0.883515
SNRNP48	cluster_3_1	0.62103	-0.196786	0.451177	-0.297768	-0.220637	0.00419841
SNRNP70	cluster_3_1	0.446455	0.531793	0.463423	0.527102	0.764971	0.712356
SNRPB	cluster_3_1	-0.541115	-0.765732	0.421949	0.559061	0.780695	0.661129
SOCS3	cluster_3_1	0.788465	-0.227913	0.0810677	0.232634	0.865757	0.203645
SPAG1	cluster_3_1	0.573732	0.647641	0.463075	0.589143	0.725644	0.767914
SPATS2	cluster_3_1	0.709566	0.561277	0.78644	-0.498718	-0.602563	0.562983
SRP68	cluster_3_1	0.706233	0.586486	0.870411	-0.145857	0.91182	0.283939
SS18	cluster_3_1	-0.206775	-0.204162	0.899501	0.546312	0.923248	0.635512
SSR2	cluster_3_1	0.536808	0.587896	0.711945	0.809706	0.369409	0.453553
ST14	cluster_3_1	-0.0556367	0.190868	0.698318	0.307598	0.889591	0.91017
ST3GAL1	cluster_3_1	-0.0410804	-0.0940925	0.343055	0.463713	0.934924	0.989095
STK38	cluster_3_1	0.847923	0.815683	0.874739	0.843271	0.671757	0.787602
STOML2	cluster_3_1	0.667139	0.677054	0.711605	0.093094	0.745013	0.580336
TBC1D4	cluster_3_1	0.69167	0.410403	0.84999	0.819439	0.920858	0.924716
TBL1XR1	cluster_3_1	0.730221	0.88428	0.816554	0.682117	0.804491	0.16021
TES	cluster_3_1	-0.794305	-0.806811	0.7991	0.67465	0.81098	0.744664
THOC1	cluster_3_1	-0.0143804	-0.056627	0.124538	0.176881	-0.118076	-0.07027
THOC6	cluster_3_1	0.892959	0.933378	-0.249133	0.632904	0.911556	0.842583
TIMM44	cluster_3_1	0.691173	0.477041	-0.154909	0.178413	0.961221	0.97281
TINAGL1	cluster_3_1	0.653499	-0.485385	0.439383	0.582865	0.507908	0.305288
TM2D3	cluster_3_1	0.824926	-0.175625	0.842718	0.658795	0.869528	0.97671
TMCO3	cluster_3_1	0.365421	0.554577	0.207098	0.0500828	-0.0140821	-0.0168558
TMED9	cluster_3_1	0.077177	-0.393068	0.571686	0.871439	0.845819	0.948685
TMEM165	cluster_3_1	0.901446	0.679503	0.854371	0.867596	0.368565	0.426052
TMEM2	cluster_3_1	0.938043	0.229185	-0.62523	-0.515592	-0.0929766	0.560105
TMEM231	cluster_3_1	0.106176	-0.0357273	-0.261694	-0.373021	-0.0498368	-0.294697
TMEM47	cluster_3_1	-0.257837	0.908797	0.899966	0.392694	0.915101	0.551883
TMEM56	cluster_3_1	0.734034	0.17667	0.0211207	-0.328525	0.870065	0.782965
TMTC2	cluster_3_1	-0.58105	-0.273284	0.277054	0.207695	-0.0584445	-0.111627
TNFRSF12A	cluster_3_1	0.894446	0.894087	0.0742141	0.196238	0.634942	0.806815
TNKS2	cluster_3_1	0.631294	-0.511052	0.246763	0.0108717	-0.128873	-0.221831
TNPO3	cluster_3_1	0.45405	0.423836	0.716933	0.601147	0.400688	0.735667
TOB1	cluster_3_1	0.169907	0.141643	0.489116	0.627652	0.17134	0.0271318
TOP1P2	cluster_3_1	0.892816	0.921338	0.877675	0.882795	0.433141	0.410156
TOP2A	cluster_3_1	0.564841	0.668282	0.940824	0.91775	0.861627	0.85992
TPBG	cluster_3_1	0.316688	0.396464	0.47508	0.461656	0.875709	0.688087
TRABD	cluster_3_1	0.713875	0.57605	-0.343567	-0.349028	0.795606	0.688293
TRIM2	cluster_3_1	0.242138	0.0431684	0.478164	0.648885	0.619575	0.88427
TRIP10	cluster_3_1	0.567567	-0.121872	-0.429983	0.419106	0.678605	0.555914
TRNP1	cluster_3_1	0.348104	0.291097	0.350523	0.276722	0.546833	0.525398
TSPAN13	cluster_3_1	0.113798	-0.320129	0.872754	0.847553	0.812809	0.353179
TTC31	cluster_3_1	-0.368159	0.00580789	0.1005	-0.229836	-0.284834	-0.40715
TTC4	cluster_3_1	0.835788	0.236368	0.559679	0.550803	0.911891	0.956809
TTYH3	cluster_3_1	0.848091	0.756024	-0.298804	-0.346949	0.165894	0.076987
TYW1B	cluster_3_1	0.24719	-0.733783	0.0528598	-0.027577	0.45018	0.394378
UBE2D1	cluster_3_1	0.348789	0.345481	0.36323	0.671586	0.892759	0.91347
UBE2E3	cluster_3_1	-0.0598753	0.414235	0.842607	0.901326	0.853278	0.873452
UBXN4	cluster_3_1	0.778866	0.925029	0.925073	0.800439	0.947952	0.858995
UGCG	cluster_3_1	-0.116647	0.185581	-0.344893	-0.481485	-0.43031	-0.365471
UGT1A8	cluster_3_1	-0.578803	-0.209991	0.86903	0.849967	0.655252	0.0265669
UHRF2	cluster_3_1	0.571856	0.441284	-0.108093	0.0273974	-0.388707	-0.519715
USP43	cluster_3_1	0.757941	0.55477	0.0232654	0.634135	0.398453	0.67249
USP44	cluster_3_1	0.492672	0.356145	0.789365	0.834459	0.390404	0.459896
USP6	cluster_3_1	0.546708	0.582463	0.910053	0.543662	0.478663	0.156411
USP8	cluster_3_1	0.0846619	-0.37105	0.578488	0.422237	0.67864	0.64466
UTP20	cluster_3_1	0.225167	0.0761687	-0.579787	-0.584175	0.121985	0.0690519
UXS1	cluster_3_1	0.0434924	-0.0480937	0.829704	0.695825	0.826688	0.828299
VEPH1	cluster_3_1	0.144673	0.600176	0.616116	0.431332	0.100975	0.295508
VPRBP	cluster_3_1	-0.274574	0.687512	0.404604	0.608227	0.545858	0.396864
WDFY1	cluster_3_1	-0.207269	-0.382753	0.921573	0.849999	0.959908	0.95431
WDR1	cluster_3_1	-0.460971	-0.484864	0.47461	0.483373	-0.0104687	0.0400457
WDR20	cluster_3_1	0.559542	0.176242	-0.312123	-0.365102	-0.30977	-0.256724
WDR82	cluster_3_1	0.815041	0.848088	0.573853	0.229037	0.78644	0.593625
XPO1	cluster_3_1	0.81688	0.811057	0.8847	0.911656	-0.0171261	-0.0159353
XPOT	cluster_3_1	0.223034	0.169519	0.896539	0.885461	0.592069	0.615302
XRN2	cluster_3_1	0.882131	0.767139	0.677814	0.574676	0.412124	0.349105
YARS	cluster_3_1	0.397695	0.472126	0.300858	0.180773	0.648657	0.652161
ZBTB6	cluster_3_1	0.800542	-0.185945	0.189155	-0.566128	0.738651	0.392476
ZC3H13	cluster_3_1	0.387614	0.70437	0.964203	0.941565	0.964425	0.957257
ZDHHC18	cluster_3_1	0.276161	0.110885	0.417482	-0.211639	0.80856	0.330413
ZDHHC7	cluster_3_1	0.866558	0.920604	0.84128	0.744876	0.830707	0.732352
ZFP91	cluster_3_1	-0.0529403	-0.137143	0.961957	0.709639	0.961204	0.969632
ZNF451	cluster_3_1	-0.132426	-0.0541935	0.426313	0.568212	0.647346	0.683201
ZNF468	cluster_3_1	0.658764	0.582013	0.955892	0.656935	0.863262	0.63328
ZNF644	cluster_3_1	0.551494	0.501303	0.619695	0.591478	-0.0545015	-0.0477459
ZNF800	cluster_3_1	-0.125703	-0.459819	0.696548	0.707143	0.444078	0.427543
MDN1	cluster_3_1	0.568354	0.600822	0.525322	0.478351	0.322039	0.302006
AHCY	cluster_2_2	0.828677	0.649624	0.612204	0.00927447	0.86872	0.0391583
AKAP2	cluster_2_2	0.583363	0.338573	0.874093	0.831937	0.841785	0.800698
ALKBH5	cluster_2_2	-0.0942873	-0.0382604	0.450674	0.462544	-0.544376	-0.460553
AP2A1	cluster_2_2	0.0701491	0.702594	-0.516595	-0.268235	0.785424	0.843672
AP2B1	cluster_2_2	0.665728	0.661528	0.865242	0.778675	0.880991	0.874467
ARID1A	cluster_2_2	0.458253	0.458756	0.800339	0.70798	0.594564	0.740991
CAPN1	cluster_2_2	0.77062	0.74841	0.72109	0.756706	0.959248	0.945845
CAPZA2	cluster_2_2	-0.589612	-0.456497	0.483745	0.355129	0.072901	-0.0600647
CCDC47	cluster_2_2	-0.0779052	-0.120617	0.897378	0.828548	0.918504	0.893309
CNN2	cluster_2_2	0.923013	0.930502	0.52804	0.562832	0.878063	0.87138
CSK	cluster_2_2	0.221001	0.0725686	0.0396255	0.159573	0.815471	0.833908
CYP24A1	cluster_2_2	0.461369	0.428041	0.439235	0.491823	0.308882	0.351478
DDX42	cluster_2_2	-0.641058	-0.910214	0.543728	-0.0140692	0.917806	0.0741432
DSG2	cluster_2_2	0.528382	0.577395	-0.154843	-0.0293114	0.772825	0.78285
ENC1	cluster_2_2	-0.137351	0.861689	0.539246	0.154642	0.847377	0.555604
GNPDA1	cluster_2_2	0.412432	0.386558	0.58209	0.683505	0.858116	0.112561
HMGA1P8	cluster_2_2	-0.503982	-0.140721	0.0636316	0.617436	0.693766	0.399905
HSP90AB2P	cluster_2_2	-0.0793908	0.0620816	0.838421	0.906977	0.973398	0.96984
ITGB6	cluster_2_2	0.016667	-0.102363	0.245302	0.230096	0.59805	0.5714
LOC401585	cluster_2_2	-0.257248	-0.462916	0.355155	0.564888	0.448203	0.0351139
LOC645752	cluster_2_2	0.651743	0.770913	0.496944	0.803379	0.314893	0.491802
LSM12	cluster_2_2	0.650886	0.85906	-0.21817	0.489028	0.703261	0.642307
MARCKSL1	cluster_2_2	0.267348	0.00609145	0.293937	-0.0533838	0.794345	0.243052
MAT2B	cluster_2_2	0.289772	0.513044	0.826519	0.792578	0.884533	0.870899
MLF2	cluster_2_2	-0.120786	-0.353719	0.626779	0.69103	0.943291	0.920596
MTMR12	cluster_2_2	-0.48017	0.274189	-0.212504	-0.103473	-0.187991	0.0500055
NUP160	cluster_2_2	0.789592	-0.0286849	0.884592	0.0432279	0.818582	0.105006
POLE	cluster_2_2	0.704148	-0.458888	-0.081191	-0.0124001	-0.730698	-0.357154
POTEKP	cluster_2_2	-0.127576	-0.0713875	0.768649	0.795606	0.901029	0.789265
PPP1CA	cluster_2_2	0.633317	0.398591	0.924023	0.798373	0.924469	0.906651
PRKDC	cluster_2_2	-0.561159	-0.619565	0.179431	0.266442	0.141738	0.190081
PRMT3	cluster_2_2	0.871597	-0.239944	-0.190638	0.0158409	0.573797	0.567611
PROM1	cluster_2_2	0.856272	0.905364	0.785809	0.762886	0.845905	0.816511
PRUNE	cluster_2_2	0.818433	0.849863	0.614858	0.563293	0.70456	0.56785
RBM25	cluster_2_2	0.836867	0.838321	0.312237	0.232615	0.541803	0.580777
SDCBPP2	cluster_2_2	-0.693399	-0.66242	0.214746	0.257618	0.434825	0.375554
SLC39A10	cluster_2_2	0.38918	0.0448	0.937577	0.916662	0.920997	0.893553
SLC6A6	cluster_2_2	0.868819	0.83475	0.8907	0.843122	-0.29285	-0.358648
SLC7A6	cluster_2_2	0.592577	0.432709	0.326308	0.344097	0.639233	0.624421
SMARCA2	cluster_2_2	0.768625	0.906337	0.953512	0.89066	0.717545	0.785528
SPRED2	cluster_2_2	0.248715	0.0573557	0.669121	0.487359	0.731661	0.563565
STIP1	cluster_2_2	0.403422	-0.431924	0.535023	0.420994	0.895893	0.770151
TAGLN2	cluster_2_2	0.869713	0.905342	0.96621	0.96644	0.730466	0.675867
TOMM40	cluster_2_2	-0.33287	-0.453986	0.120473	-0.281015	0.307735	0.29999
TOMM70A	cluster_2_2	0.79683	0.761985	0.964646	0.951622	0.969315	0.877368
TVP23C	cluster_2_2	0.664377	0.795584	0.920665	0.474195	0.938968	0.877495
UBQLN4	cluster_2_2	0.566668	0.497864	0.479046	0.346502	0.894891	0.895941
USP5	cluster_2_2	0.865029	0.702293	0.418131	0.54892	0.762703	0.64203
YWHAEP1	cluster_2_2	-0.478082	-0.262989	0.916944	0.938809	0.64636	0.665626
ACBD3	cluster_2_1	0.338154	-0.058712	0.825817	0.786209	0.688245	0.54889
APAF1	cluster_2_1	0.451513	0.204061	-0.346794	-0.283166	0.118504	0.130335
CAP1	cluster_2_1	0.409327	0.423121	0.360305	0.377519	0.636403	0.659666
CDC14B	cluster_2_1	0.751411	-0.0746602	0.746197	-0.078988	0.506505	0.531426
CFL1	cluster_2_1	0.261481	0.777005	0.808613	0.544751	0.817134	0.755997
CSNK1A1	cluster_2_1	0.680018	0.661769	0.827101	0.810308	0.798208	0.830304
CTSC	cluster_2_1	0.590018	0.246768	-0.66557	-0.671449	-0.78645	-0.823295
EPHA2	cluster_2_1	-0.276339	-0.220847	0.724074	0.775044	0.779529	0.440828
EXOC5	cluster_2_1	0.738329	0.871394	0.689806	0.634141	0.415425	0.526466
GLUL	cluster_2_1	0.893758	0.760284	0.674489	0.510954	0.887559	0.853795
GLYR1	cluster_2_1	0.700844	-0.25349	-0.104091	-0.285231	0.710348	-0.168661
NBPF14	cluster_2_1	0.503386	0.496533	0.206974	0.343182	0.20659	0.361666
POTEE	cluster_2_1	0.694622	0.417567	0.875073	0.672325	0.966473	0.938575
POTEM	cluster_2_1	0.588783	0.076035	0.938508	0.658653	0.939029	0.822817
PPP2R1A	cluster_2_1	-0.449978	-0.521862	0.0854532	0.11973	0.728394	0.760035
PPTC7	cluster_2_1	0.515926	0.0824932	0.663378	0.855218	0.798581	0.672666
PRRC2A	cluster_2_1	0.737909	0.321386	0.448478	0.420553	0.749936	0.83616
RNPS1	cluster_2_1	0.940642	0.757052	0.887912	0.737827	0.948021	0.938836
RPL36A-HNRNPH2	cluster_2_1	0.659126	0.8833	0.0337197	0.0463844	0.595943	0.518308
TMPO	cluster_2_1	0.872524	-0.173289	0.902717	0.481087	0.864218	0.887032
TOP1	cluster_2_1	0.788882	0.688189	0.765499	0.655008	0.911437	0.792587
YWHAE	cluster_2_1	0.131441	0.32184	0.885453	0.925018	-0.0409897	-0.0323182
ARL6IP1	cluster_1_1	0.64463	0.468942	0.579765	0.460721	0.867441	0.813805
CD46	cluster_1_1	0.791677	0.769402	0.84615	0.863818	0.690081	0.770003
GSPT1	cluster_1_1	0.100326	0.152973	0.877402	0.734224	0.769818	0.787918
HSP90AA2P	cluster_1_1	0.564878	0.675394	0.602546	0.628406	0.867986	0.86103
ITGB1	cluster_1_1	-0.376775	0.39675	0.651952	0.663972	0.452674	0.375068
POTEF	cluster_1_1	-0.00219099	0.0377475	0.841777	0.338955	0.876624	0.678226
TXNRD1	cluster_1_1	0.836954	0.685831	0.255613	0.356678	0.710645	0.703427
